# Supplementary material for: Generation of (amino)(boryloxy)carbenes from carbamoylboranes and their coupling reaction with aldehydes
Source: Royal Society of Chemistry journal article supplement (doi:10.1039/d1cc06377d), 2022-01-01

## **Table of Contents**

**1. General \_\_\_S2**

**2. Preparation of carbamoylboranes \_\_\_S2**

**3. Coupling reaction between carbamoylboranes and aldehydes \_\_\_S7**

**4. DFT study \_\_\_S13**

**5. References \_\_\_S23**

**6. NMR spectra \_\_\_S24**

## 1. General

All operations were performed under nitrogen atmosphere unless otherwise noted.  $^1\text{H}$  and  $^{13}\text{C}$ -NMR spectra were recorded on a Varian 400 MHz (400 MHz for  $^1\text{H}$  and 100 MHz for  $^{13}\text{C}$ ) or a Bruker AVANCE III HD (400 MHz for  $^1\text{H}$  and 100 MHz for  $^{13}\text{C}$ ) using  $\text{CHCl}_3$  ( $^1\text{H}$ ,  $\delta = 7.26$  ppm) and  $\text{CDCl}_3$  ( $^{13}\text{C}$ ,  $\delta = 77.0$  ppm) as an internal standard.  $^{11}\text{B}$ -NMR spectra were recorded on a Varian 400 MHz or a Bruker AVANCE III HD (128 MHz for  $^{11}\text{B}$ ) using  $\text{BF}_3 \cdot \text{OEt}_2$  as an external standard ( $\delta = 0$  ppm).  $^{19}\text{F}$ -NMR spectra were recorded on a Bruker AVANCE III HD (377 MHz for  $^{19}\text{F}$ ) using hexafluorobenzene as an external standard ( $\delta = -164.9$  ppm). IR spectra were recorded on an FT/IR-4200 (JASCO Co., Ltd.) spectrometer. Flash column chromatography was conducted on silica gel 60N (Kanto Chemical Co., Inc.) and preparative thin-layer chromatography (PTLC) was carried out on silica gel (Wako gel B-5F). A GPC system (LC-9130NEXT) was used for further purification. High-resolution mass analyses were performed on a Bruker micrOTOF-15focus or a JEOL JMS-GCMATEII. Dehydrated solvents were purchased from Kanto Chemical Co., Inc., and stored over molecular sieves.

## 2. Preparation of carbamoylboranes

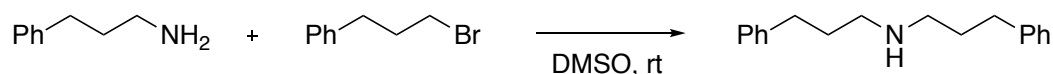

*N,N*-Bis(3-phenylpropyl)amine was prepared according to the literature.<sup>1</sup>

A DMSO (300 mL) solution of 3-phenylpropylamine (5.69 mL, 40.0 mmol) and 3-phenylpropylbromide (3.02 mL, 20.0 mmol) was stirred for 5 days. After the solution was diluted with AcOEt (500 mL), the mixture was washed with 5%  $\text{Na}_2\text{CO}_3$  aqueous solution three times and dried over  $\text{Na}_2\text{SO}_4$ . Volatile materials were removed under reduced pressure and the residue was purified by silica gel chromatography (hexane : ethyl acetate :  $\text{NEt}_3 = 75 : 20 : 5$  to  $55 : 40 : 5$ ) to give *N,N*-bis(3-phenylpropyl)amine (3.69 g, 14.6 mmol) in 73% yield. Spectral data of the product were consistent with those of the literature.<sup>1</sup>

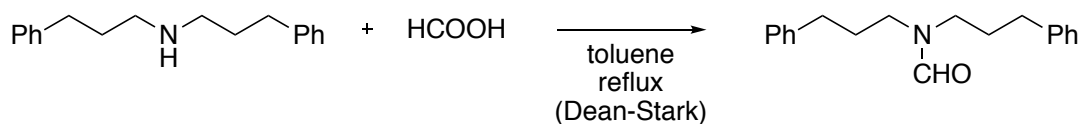

To remove water from a reaction mixture, a Dean-Stark apparatus was attached to a reaction flask. In the flask, toluene (15 mL), *N, N*-bis(3-phenylpropyl)amine (1.27 g, 5.01 mmol), and formic acid (0.57 mL, 15 mmol) were mixed, and the reaction mixture was refluxed for 7 hours. Volatile materials were removed under reduced pressure and the residue was purified by silica gel chromatography (hexane : ethyl acetate = 70 : 30 to 50 : 50) to give *N, N*-bis(3-phenylpropyl)formamide (1.32 g, 4.70 mmol) in 94% yield.

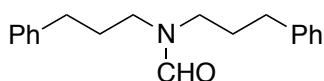

### *N, N*-Bis(3-phenylpropyl)formamide

IR (neat): 3026, 2936, 2861, 1669, 1454, 1428, 1164, 749, 700  $\text{cm}^{-1}$ ;  $^1\text{H}$  NMR ( $\text{CDCl}_3$ ) (400 MHz):  $\delta$  = 1.80-1.91 (4H, m), 2.56-2.65 (4H, m), 3.21 (2H, t,  $J$  = 7.0 Hz), 3.36 (2H, t,  $J$  = 7.6 Hz), 7.12-7.33 (10H, m), 8.02 (1H, s);  $^{13}\text{C}$  NMR ( $\text{CDCl}_3$ ) (100 MHz):  $\delta$  = 28.9, 29.9, 32.5, 33.2, 41.9, 46.8, 126.0, 126.2, 128.3, 128.4, 128.6, 140.5, 141.3, 162.9 (one carbon missing); HRMS (ESI):  $(\text{M}+\text{H})^+$ , found 282.1858.  $\text{C}_{19}\text{H}_{24}\text{NO}^+$  requires 282.1852;

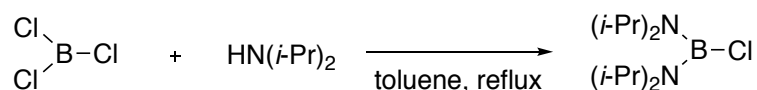

Chlorobis(diisopropylamino)borane was prepared according to the literature.<sup>2</sup>

To a toluene (42.5 mL) solution of diisopropylamine (26.8 mL, 191 mmol) was added a 1.0 M heptane solution of  $\text{BCl}_3$  (42.5 mL, 42.5 mmol) slowly at room temperature. The reaction mixture was warmed to 40 °C. Then the mixture was refluxed for 5 hours. In a glove box, the resultant salt was filtered off. Hexane was used as an eluent. After the removal of solvents, chlorobis(diisopropylamino)borane was distilled under reduced pressure (8.36 g, 33.9 mmol, 80% yield). Spectral data of the product were consistent with those of the literature.<sup>2</sup>

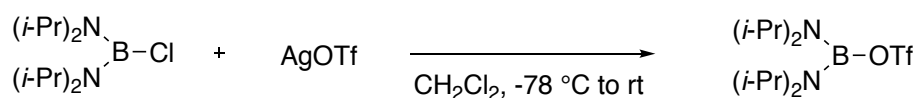

A mixture of silver triflate (4.97 g, 19.3 mmol) and CH<sub>2</sub>Cl<sub>2</sub> (160 mL) was cooled to -78 °C. To the mixture was added a CH<sub>2</sub>Cl<sub>2</sub> solution (40 mL) of chlorobis(diisopropylamino)borane (4.77 g, 19.3 mmol) slowly at that temperature. After completion of dropping, the reaction mixture was warmed to room temperature slowly and stirred at the temperature for 1 hour. In a glove box, the resultant silver chloride was filtered off through short pad of Celite<sup>®</sup>. Solvent was removed under reduced pressure to give bis(diisopropylamino)boryl trifluoromethanesulfonate (6.72 g, 18.7 mmol) as a brown solid in 97% yield.

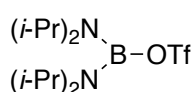

### Bis(diisopropylamino)boryl trifluoromethanesulfonate

<sup>1</sup>H NMR (CDCl<sub>3</sub>) (400 MHz): δ = 1.17 (24H, d, *J* = 6.8 Hz), 3.47 (4H, sept, *J* = 6.8 Hz); <sup>11</sup>B NMR (CDCl<sub>3</sub>) (128 MHz): δ = 25.0 (singlet);

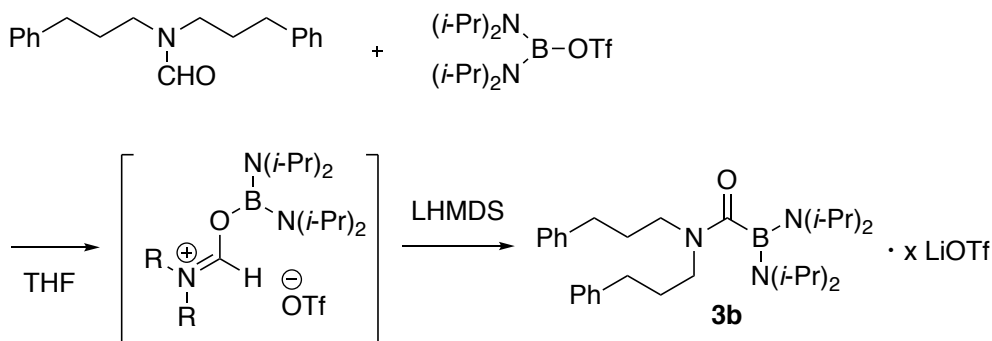

Carbamoylboranes were prepared by modified procedure.<sup>3</sup>

In a two-necked flask, bis(diisopropylamino)boryl trifluoromethanesulfonate (2.88 g, 8.00 mmol) was cooled to -78 °C. To this was added a THF (15 mL) solution of *N,N*-bis(3-phenylpropyl)formamide (2.25 g, 8.00 mmol) slowly at that temperature. The reaction mixture was warmed to room temperature and stirred for 5 minutes. The reaction mixture was cooled to -78 °C, then a THF solution of lithium hexamethyldisilazide (*ca.* 1.3M, 6.2 mL, 8.0 mmol) was added slowly. The mixture was warmed to room temperature slowly and stirred for 30 minutes. After solvents were removed under reduced pressure, the residue was transferred into a glove box. The product was extracted with hexane-toluene (3 : 1) and the solution was filtered several times. Solvents were removed under reduced pressure. The resultant solid residue was washed with hexane-toluene (95 : 5). The solid was collected and dried under vacuum to give **3b** •

0.85LiOTf (3.05 g, 4.89 mmol) in 61% yield. **3b** • 0.9LiOTf and **3b** • 1.04LiOTf were also obtained by similar processes. LiOTf was identified by <sup>19</sup>F NMR. (carbamoylborane-LiOTf complex:<sup>19</sup>F NMR (CD<sub>3</sub>CN) (377 MHz): δ = -79.7; LiOTf :<sup>19</sup>F NMR (CD<sub>3</sub>CN) (377 MHz): δ = -79.8)

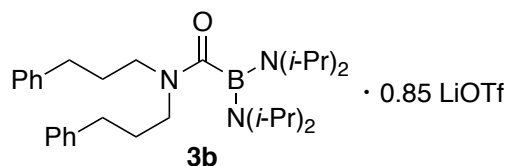

### Bis(diisopropylamino)(*N,N*-bis(3-phenylpropyl)carbamoyl)borane • 0.85 LiOTf

#### (**3b** • 0.85 LiOTf)

<sup>1</sup>H NMR (CD<sub>3</sub>CN) (400 MHz): δ = 1.09 (12H, d, *J* = 6.8 Hz), 1.15 (12H, d, *J* = 6.8 Hz), 1.72-1.93 (4H, m), 2.55-2.64 (4H, m), 3.21-3.32 (4H, m), 3.43 (4H, sept, *J* = 6.8 Hz), 7.14-7.32 (10H, m) (CHD<sub>2</sub>CN (<sup>1</sup>H, δ = 1.94) was used as an internal standard.); <sup>13</sup>C NMR (CD<sub>3</sub>CN) (100 MHz): δ = 24.4, 24.6, 29.4, 30.3, 34.0, 34.2, 42.6, 48.4, 50.5, 126.8, 127.0, 129.2, 129.30, 129.33, 129.4, 142.3, 143.0, 189.9 (CD<sub>3</sub>CN (<sup>13</sup>C, δ = 118.26) was used as an internal standard.); <sup>11</sup>B NMR (CD<sub>3</sub>CN) (128 MHz): δ = 30.8; HRMS (ESI): (M+Na)<sup>+</sup>, found 514.3962. C<sub>31</sub>H<sub>50</sub>BN<sub>3</sub>NaO<sup>+</sup> requires 514.3945; *Anal.* Calcd for C<sub>31.85</sub>F<sub>2.55</sub>H<sub>50</sub>BN<sub>3</sub>O<sub>3.55</sub>Li<sub>0.85</sub>S<sub>0.85</sub>: C, 61.28; H, 8.07; N, 6.73; S, 4.37%. Found: C, 61.60; H, 8.34; N, 6.33; S, 4.37%.

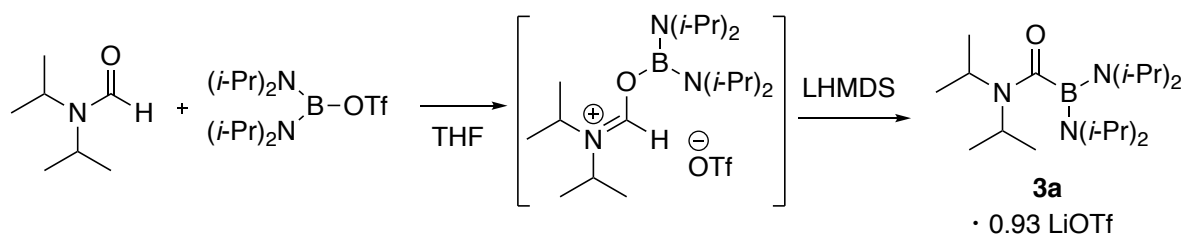

In a two-necked flask, bis(diisopropylamino)boryl trifluoromethanesulfonate (487 mg, 1.35 mmol) was cooled to -78 °C. To this was added a THF (3 mL) solution of *N,N*-diisopropylformamide (0.20 mL, 1.35 mmol) slowly at that temperature. The reaction mixture was warmed to room temperature and stirred for 5 minutes. The reaction mixture was cooled to -78 °C, then a THF solution of lithium hexamethyldisilazide (*ca.* 1.3M, 1.04 mL, 1.35 mmol) was added slowly. The mixture was warmed to room temperature slowly and stirred for 30 minutes. After solvents were removed under reduced pressure, the residue was transferred into a glove box. The product was extracted with hexane-toluene (1 : 1). Then, the extract was filtered and evaporated under vacuum. Recrystallization from ether afforded **3a** • 0.93LiOTf (107 mg, 0.221 mmol) in 16% yield.

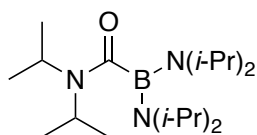

**3a**

• 0.93 LiOTf

**Bis(diisopropylamino)(*N,N*-diisopropylcarbamoyl)borane • 0.93 LiOTf (3a • 0.93 LiOTf)**

<sup>1</sup>H NMR (CDCl<sub>3</sub>) (400 MHz): δ = 1.17-1.21 (18H, m), 1.22 (12H, d, *J* = 6.8 Hz), 1.44 (6H, d, *J* = 6.8 Hz), 3.27 (1H, sept, *J* = 6.8 Hz), 3.51 (4H, sept, *J* = 7.0 Hz), 3.84 (1H, sept, *J* = 6.6 Hz); <sup>13</sup>C NMR (CDCl<sub>3</sub>) (100 MHz): δ = 20.0, 20.9, 24.4, 24.8, 44.7, 48.0, 49.4, 189.8; <sup>11</sup>B NMR (CD<sub>3</sub>Cl<sub>3</sub>) (128 MHz): δ = 29.1; HRMS (ESI): (M+Na)<sup>+</sup>, found 362.3308. C<sub>19</sub>H<sub>42</sub>BN<sub>3</sub>NaO<sup>+</sup> requires 362.3317; *Anal.* Calcd for C<sub>19.93</sub>F<sub>2.79</sub>H<sub>42</sub>BN<sub>3</sub>O<sub>3.79</sub>Li<sub>0.93</sub>S<sub>0.93</sub>: C, 49.41; H, 8.74; N, 8.68; S, 6.15%. Found: C, 49.34; H, 8.66; N, 8.38; S, 5.87%. Spectral data were consistent with those of the literature.<sup>3</sup>

**Preparation of LiOTf-free carbamoylborane 3b**

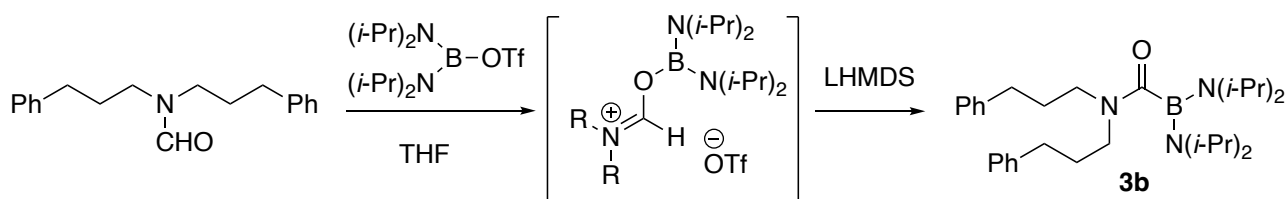

In a two-necked flask, bis(diisopropylamino)boryl trifluoromethanesulfonate (363 mg, 1.01 mmol) was cooled to -78 °C. To this was added a THF (2 mL) solution of *N,N*-bis(3-phenylpropyl)formamide (281 mg, 1.00 mmol) slowly at that temperature. The reaction mixture was warmed to room temperature and stirred for 5 minutes. The reaction mixture was cooled to -78 °C, then a THF solution of lithium hexamethyldisilazide (*ca.* 1.3M, 0.77 mL, 1.0 mmol) was added slowly. The mixture was warmed to room temperature slowly and stirred overnight. After solvents were removed under reduced pressure, the flask was transferred into a glove box. The product was extracted with hexane-toluene (3:1, 10 mL), and the extract was filtered. To the solution was added pre-dried MS4A (2 g) and the mixture was stirred at room temperature for 2 hours. After the mixture was filtered, solvents were removed under reduced pressure. The residue was dissolved in hexane-toluene (3:1, 10 mL). To the solution was added pre-dried MS4A (2 g) and the mixture was stirred at room temperature for 2 hours. After the mixture was filtered, solvents were removed under reduced pressure. The underlined process was repeated four times. LiOTf-free carbamoylborane **3b** (106 mg, 0.216 mmol) containing small amount of the formamide was obtained in 22% yield. LiOTf was not detected by <sup>19</sup>F NMR.

### 3. Coupling reaction between carbamoylboranes and aldehydes

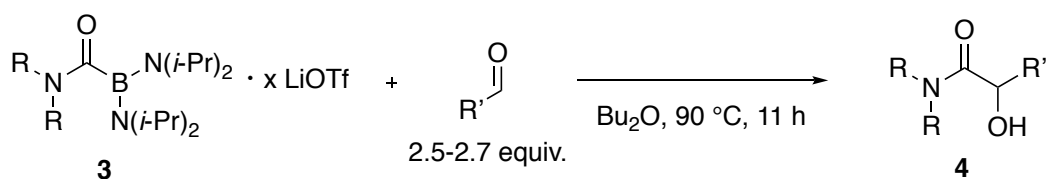

General procedure of the coupling reaction between carbamoylboranes and aldehydes: In a test tube, MS4A (0.20 g) was heated with a heat-gun under reduced pressure just before use. After nitrogen was charged, the test tube was transferred into a glove box. In the glove box, dibutyl ether (2 mL) was stirred with the pre-dried MS4A overnight. In a vial, a carbamoylborane-LiOTf complex (0.0782 mmol), an aldehyde (0.21 mmol), and supernatant dibutyl ether (0.2 mL) were mixed, and the vial was capped. After the mixture was heated at 90 °C for 11 hours, the reaction was quenched with pH = 7 phosphate buffer, and organic compounds were extracted with ethyl acetate three times. Combined organic layer was washed with brine and dried over MgSO<sub>4</sub>. Volatile materials were removed under reduced pressure, and the residue was purified by silica gel chromatography (hexane : ethyl acetate = 7 : 3) to give an  $\alpha$ -hydroxyamide.

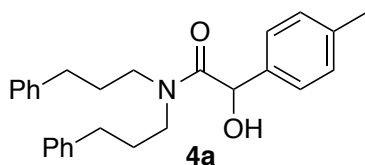

#### *N,N*-Bis(3-phenylpropyl)-2-hydroxy-2-(4-methylphenyl)acetamide

IR (KBr): 3343, 3026, 2930, 2865, 1620, 1402, 1363, 1053, 749, 699 cm<sup>-1</sup>; <sup>1</sup>H NMR (CDCl<sub>3</sub>) (400 MHz):  $\delta$  = 1.30-1.44 (1H, m), 1.56-1.73 (1H, m), 1.74-1.93 (2H, m), 2.25-2.38 (1H, m), 2.32 (3H, s), 2.40-2.52 (1H, m), 2.57 (2H, t,  $J$  = 7.8 Hz), 2.82-2.94 (1H, m), 3.01-3.13 (1H, m), 3.17-3.27 (1H, m), 3.52-3.63 (1H, m), 4.74 (1H, d,  $J$  = 6.4 Hz), 4.92 (1H, d,  $J$  = 6.4 Hz), 6.93-7.33 (14H, m); <sup>13</sup>C NMR (CDCl<sub>3</sub>) (100 MHz):  $\delta$  = 21.1, 28.9, 29.5, 32.8, 33.1, 46.06, 46.13, 71.4, 126.0, 126.2, 127.3, 128.2, 128.4, 128.6, 129.6, 136.7, 138.2, 140.5, 141.3, 172.1 (one carbon missing); HRMS (ESI): (M+Na)<sup>+</sup>, found 424.2262. C<sub>27</sub>H<sub>31</sub>NNaO<sub>2</sub><sup>+</sup> requires 424.2247;

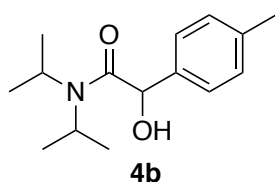

### ***N,N*-Diisopropyl-2-hydroxy-2-(4-methylphenyl)acetamide**

IR (KBr): 3356, 3000, 2976, 2939, 1631, 1372, 1334, 1062, 1041, 890, 523  $\text{cm}^{-1}$ ;  $^1\text{H}$  NMR ( $\text{CDCl}_3$ ) (400 MHz):  $\delta$  = 0.97 (3H, d,  $J$  = 6.8 Hz), 1.14 (3H, d,  $J$  = 6.8 Hz), 1.40 (3H, d,  $J$  = 6.8 Hz), 1.47 (3H, d,  $J$  = 6.8 Hz), 2.33 (3H, s), 3.35 (1H, sep,  $J$  = 6.8 Hz), 3.80 (1H, sep,  $J$  = 6.8 Hz), 5.04-5.10 (2H, m), 7.12-7.19 (4H, m);  $^{13}\text{C}$  NMR ( $\text{CDCl}_3$ ) (100 MHz):  $\delta$  = 18.7, 19.6, 20.5, 21.2, 46.3, 47.9, 71.6, 127.3, 129.6, 137.2, 138.0, 170.8 (one carbon missing); HRMS (ESI): ( $\text{M}+\text{Na}$ ) $^+$ , found 272.1625.  $\text{C}_{15}\text{H}_{23}\text{NNaO}_2^+$  requires 272.1621;

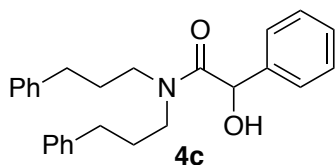

### ***N,N*-Bis(3-phenylpropyl)-2-hydroxy-2-phenylacetamide**

IR (KBr): 3343, 3033, 2931, 2864, 1625, 1405, 1363, 1052, 749, 699  $\text{cm}^{-1}$ ;  $^1\text{H}$  NMR ( $\text{CDCl}_3$ ) (400 MHz):  $\delta$  = 1.36-1.50 (1H, m), 1.60-1.74 (1H, m), 1.75-1.92 (2H, m), 2.26-2.37 (1H, m), 2.45-2.55 (1H, m), 2.57 (2H, t,  $J$  = 7.8 Hz), 2.82-2.92 (1H, m), 3.03-3.13 (1H, m), 3.16-3.26 (1H, m), 3.55-3.64 (1H, m), 4.79 (1H, d,  $J$  = 6.6 Hz), 4.93 (1H, d,  $J$  = 6.6 Hz), 7.00-7.35 (15H, m);  $^{13}\text{C}$  NMR ( $\text{CDCl}_3$ ) (100 MHz):  $\delta$  = 28.9, 29.4, 32.7, 33.1, 46.03, 46.04, 71.6, 126.0, 126.3, 127.4, 128.2, 128.3, 128.39, 128.41, 128.6, 129.0, 139.5, 140.4, 141.2, 171.9; HRMS (ESI): ( $\text{M}+\text{Na}$ ) $^+$ , found 410.2108.  $\text{C}_{26}\text{H}_{29}\text{NNaO}_2^+$  requires 410.2091;

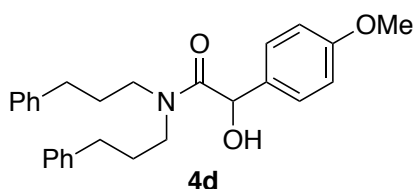

### ***N,N*-Bis(3-phenylpropyl)-2-hydroxy-2-(4-methoxyphenyl)acetamide**

IR (KBr): 3339, 2932, 1623, 1513, 1253, 1035, 752, 701  $\text{cm}^{-1}$ ;  $^1\text{H}$  NMR ( $\text{CDCl}_3$ ) (400 MHz):  $\delta$  = 1.37-1.50 (1H, m), 1.60-1.74 (1H, m), 1.74-1.92 (2H, m), 2.27-2.38 (1H, m), 2.45-2.55 (1H, m), 2.57 (2H, t,  $J$  = 7.8 Hz), 2.81-2.92 (1H, m), 3.02-3.13 (1H, m), 3.15-3.26 (1H, m), 3.54-3.65 (1H, m), 3.78 (3H, s), 4.72 (1H, d,  $J$  = 6.4 Hz), 4.89 (1H, d,  $J$  = 6.4 Hz), 6.81 (2H, d,  $J$  = 8.6 Hz), 6.97 (2H, d,  $J$  = 8.6 Hz), 7.00-7.34 (10H, m);  $^{13}\text{C}$  NMR ( $\text{CDCl}_3$ ) (100 MHz):  $\delta$  = 28.9, 29.4, 32.8, 33.1, 46.0, 46.1, 55.2, 71.0, 114.3, 126.0, 126.3, 128.2, 128.3, 128.4, 128.6, 128.7, 131.9, 140.4, 141.3, 159.5, 172.2; HRMS (ESI): ( $\text{M}+\text{Na}$ ) $^+$ , found 440.2212.  $\text{C}_{27}\text{H}_{31}\text{NNaO}_3^+$  requires 440.2196;



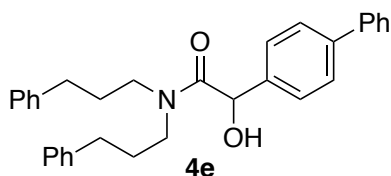

***N,N*-Bis(3-phenylpropyl)-2-hydroxy-2-(4-phenylphenyl)acetamide**

IR (KBr): 3341, 3028, 2931, 2865, 1626, 1403, 1363, 1054, 751, 699  $\text{cm}^{-1}$ ;  $^1\text{H}$  NMR ( $\text{CDCl}_3$ ) (400 MHz):  $\delta$  = 1.35-1.50 (1H, m), 1.59-1.75 (1H, m), 1.76-1.95 (2H, m), 2.27-2.38 (1H, m), 2.44-2.55 (1H, m), 2.58 (2H, t,  $J$  = 7.8 Hz), 2.87-2.98 (1H, m), 3.05-3.16 (1H, m), 3.18-3.30 (1H, m), 3.54-3.65 (1H, m), 4.81 (1H, d,  $J$  = 6.4 Hz), 4.98 (1H, d,  $J$  = 6.4 Hz), 6.98-7.58 (19H, m);  $^{13}\text{C}$  NMR ( $\text{CDCl}_3$ ) (100 MHz):  $\delta$  = 28.9, 29.5, 32.8, 33.1, 46.1, 46.2, 71.3, 126.0, 126.3, 127.1, 127.5, 127.7, 127.8, 128.23, 128.24, 128.4, 128.6, 128.8, 138.5, 140.4, 141.2, 141.3, 171.9 (one carbon missing); HRMS (ESI):  $(\text{M}+\text{Na})^+$ , found 486.2385.  $\text{C}_{32}\text{H}_{33}\text{NNaO}_2^+$  requires 486.2404;

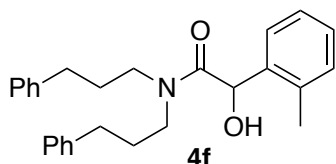

***N,N*-Bis(3-phenylpropyl)-2-hydroxy-2-(2-methylphenyl)acetamide**

IR (neat): 3389, 3026, 2936, 1644, 1455, 1395, 1051, 751, 700  $\text{cm}^{-1}$ ;  $^1\text{H}$  NMR ( $\text{CDCl}_3$ ) (400 MHz):  $\delta$  = 1.20-1.34 (1H, m), 1.58-1.71 (1H, m), 1.80-2.00 (2H, m), 2.26-2.32 (2H, m), 2.32 (3H, s), 2.62 (2H, t,  $J$  = 7.8 Hz), 2.79-2.97 (2H, m), 3.24-3.33 (1H, m), 3.52-3.62 (1H, m), 4.64 (1H, d,  $J$  = 6.0 Hz), 5.22 (1H, d,  $J$  = 6.0 Hz), 6.92-7.32 (14H, m);  $^{13}\text{C}$  NMR ( $\text{CDCl}_3$ ) (100 MHz):  $\delta$  = 18.9, 28.8, 29.2, 32.8, 33.3, 46.0, 46.3, 68.9, 126.0, 126.2, 126.7, 127.2, 128.1, 128.3, 128.4, 128.5, 128.6, 131.1, 136.4, 137.5, 140.4, 141.2, 172.5; HRMS (ESI):  $(\text{M}+\text{Na})^+$ , found 424.2261.  $\text{C}_{27}\text{H}_{31}\text{NNaO}_2^+$  requires 424.2247;

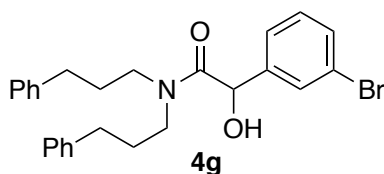

***N,N*-Bis(3-phenylpropyl)-2-(3-bromophenyl)-2-hydroxyacetamide**

IR (neat): 3390, 3026, 2937, 2861, 1736, 1644, 1454, 1188, 1073, 749, 698  $\text{cm}^{-1}$ ;  $^1\text{H}$  NMR ( $\text{CDCl}_3$ ) (400 MHz):  $\delta$  = 1.47-1.60 (1H, m), 1.61-1.76 (1H, m), 1.84 (2H, quint,  $J$  = 7.6 Hz), 2.29-2.40 (1H, m), 2.51-2.62 (3H, m), 2.80-2.90 (1H, m), 2.98-3.10 (1H, m), 3.17-3.27 (1H, m), 3.55-3.66 (1H, m), 4.58-4.90 (1H, broad), 4.82 (1H, s), 6.90-7.46 (14H, m);  $^{13}\text{C}$  NMR ( $\text{CDCl}_3$ ) (100 MHz):  $\delta$  = 28.8, 29.4, 32.6, 33.1, 45.9, 46.1, 70.8, 122.9, 125.9, 126.0, 126.5, 128.21, 128.22, 128.4, 128.7, 130.4,

130.5, 131.6, 140.2, 141.1, 141.7, 171.3; HRMS (ESI): (M+Na)<sup>+</sup>, found 488.1212. C<sub>26</sub>H<sub>28</sub><sup>79</sup>BrNNaO<sub>2</sub><sup>+</sup> requires 488.1196;

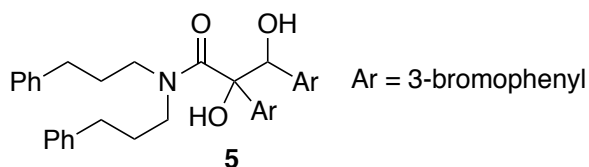

***N,N*-Bis(3-phenylpropyl)-2,3-bis(3-bromophenyl)-2,3-dihydroxypropanamide**

IR (KBr): 3368, 3025, 2928, 1613, 1454, 1182, 1073, 748, 699 cm<sup>-1</sup>; <sup>1</sup>H NMR (CDCl<sub>3</sub>) (400 MHz): δ = 1.00-2.00 (4H, m), 2.10-2.23 (2H, m), 2.49-2.66 (2H, m), 2.90-3.45 (4H, m), 3.69 (0.31H, s (OH)), 4.30 (0.31H, broad (OH)), 4.78 (0.69H, broad (OH)), 5.17 (0.69H, s), 5.40 (0.31H, s), 6.56 (0.31H, d, *J* = 7.2 Hz), 6.89-7.51 (17.69H, m); <sup>13</sup>C NMR (CDCl<sub>3</sub>) (100 MHz): δ = 28.1, 28.4, 29.4, 29.6, 32.9, 33.0, 33.2, 33.3, 46.3, 46.4, 47.5, 78.4, 79.8, 82.0, 121.5, 121.8, 122.2, 122.6, 123.4, 125.2, 125.96, 126.02, 126.1, 126.4, 126.6, 127.9, 128.1, 128.2, 128.27, 128.34, 128.40, 128.45, 128.5, 129.2, 129.5, 129.8, 130.6, 130.7, 131.1, 131.17, 131.21, 131.4, 138.6, 139.8, 140.3, 140.65, 140.71, 140.9, 141.21, 141.25, 171.8, 172.7(6 carbons missing); (NMR spectra were measured with a fraction of 31:69 diastereomixture.); HRMS (ESI): (M+Na)<sup>+</sup>, found 672.0743. C<sub>33</sub>H<sub>33</sub><sup>79</sup>Br<sub>2</sub>NNaO<sub>3</sub><sup>+</sup> requires 672.0719;

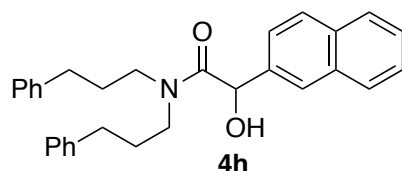

***N,N*-Bis(3-phenylpropyl)-2-hydroxy-2-(2-naphthyl)acetamide**

IR (KBr): 3349, 3059, 3023, 2928, 2863, 1624, 1363, 1054, 747, 700 cm<sup>-1</sup>; <sup>1</sup>H NMR (CDCl<sub>3</sub>) (400 MHz): δ = 1.24-1.40 (1H, m), 1.58-1.73 (1H, m), 1.75-1.93 (2H, m), 2.20-2.31 (1H, m), 2.37-2.48 (1H, m), 2.57 (2H, t, *J* = 7.8 Hz), 2.84-2.94 (1H, m), 3.08-3.29 (2H, m), 3.56-3.66 (1H, m), 4.88 (1H, d, *J* = 6.4 Hz), 5.10 (1H, d, *J* = 6.4 Hz), 6.80-6.88 (2H, m), 7.09-7.33 (9H, m), 7.46-7.53 (3H, m), 7.76-7.85 (3H, m); <sup>13</sup>C NMR (CDCl<sub>3</sub>) (100 MHz): δ = 28.9, 29.6, 32.7, 33.1, 46.1, 46.2, 71.7, 124.5, 126.0, 126.3, 126.4, 126.9, 127.7, 128.0, 128.16, 128.22, 128.4, 128.6, 129.1, 133.18, 133.25, 136.9, 140.3, 141.2, 171.9 (one carbon missing); HRMS (ESI): (M+Na)<sup>+</sup>, found 460.2251. C<sub>30</sub>H<sub>31</sub>NNaO<sub>2</sub><sup>+</sup> requires 460.2247;

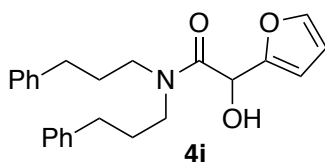

***N,N*-Bis(3-phenylpropyl)-2-(2-furyl)-2-hydroxyacetamide**

IR (KBr): 3333, 3030, 2932, 2867, 1635, 1404, 1052, 1037, 749, 697  $\text{cm}^{-1}$ ;  $^1\text{H}$  NMR ( $\text{CDCl}_3$ ) (400 MHz):  $\delta$  = 1.40-1.55 (1H, m), 1.65-1.79 (1H, m), 1.80-1.94 (2H, m), 2.36-2.58 (2H, m), 2.59 (2H, t,  $J$  = 7.6 Hz), 2.96-3.07 (1H, m), 3.08-3.20 (1H, m), 3.23-3.34 (1H, m), 3.52-3.63 (1H, m), 4.63 (1H, d,  $J$  = 6.8 Hz), 5.11 (1H, d,  $J$  = 6.8 Hz), 6.10 (1H, d,  $J$  = 2.8 Hz), 6.30-6.34 (1H, m), 7.05-7.37 (11H, m);  $^{13}\text{C}$  NMR ( $\text{CDCl}_3$ ) (100 MHz):  $\delta$  = 28.8, 29.5, 32.7, 33.1, 46.1(2C), 64.5, 108.2, 110.6, 126.0, 126.3, 128.19, 128.24, 128.4, 128.6, 140.4, 141.2, 142.6, 152.2, 169.7; HRMS (ESI): ( $\text{M}+\text{Na}$ ) $^+$ , found 400.1884.  $\text{C}_{24}\text{H}_{27}\text{NNaO}_3^+$  requires 400.1883;

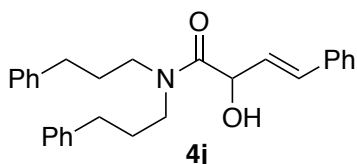

**(3*E*)-*N,N*-Bis(3-phenylpropyl)-2-hydroxy-4-phenyl-3-butenamide**

IR (KBr): 3373, 3026, 2931, 2862, 1621, 1364, 1033, 749, 700  $\text{cm}^{-1}$ ;  $^1\text{H}$  NMR ( $\text{CDCl}_3$ ) (400 MHz):  $\delta$  = 1.78-1.94 (4H, m), 2.43-2.67 (4H, m), 3.03-3.15 (1H, m), 3.22-3.37 (2H, m), 3.52-3.62 (1H, m), 4.29 (1H, d,  $J$  = 7.2 Hz), 4.62 (1H, t,  $J$  = 7.4 Hz), 5.97 (1H, dd,  $J$  = 15.8, 8.0 Hz), 6.35 (1H, d,  $J$  = 15.8 Hz), 7.01-7.33 (15H, m);  $^{13}\text{C}$  NMR ( $\text{CDCl}_3$ ) (100 MHz):  $\delta$  = 29.0, 30.1, 32.8, 33.2, 46.1, 46.2, 69.8, 126.0, 126.38, 126.42, 126.7, 128.2, 128.3, 128.4, 128.6, 128.7, 133.9, 135.9, 140.4, 141.2, 171.9 (one carbon missing); HRMS (ESI): ( $\text{M}+\text{Na}$ ) $^+$ , found 436.2239.  $\text{C}_{28}\text{H}_{31}\text{NNaO}_2^+$  requires 436.2247;

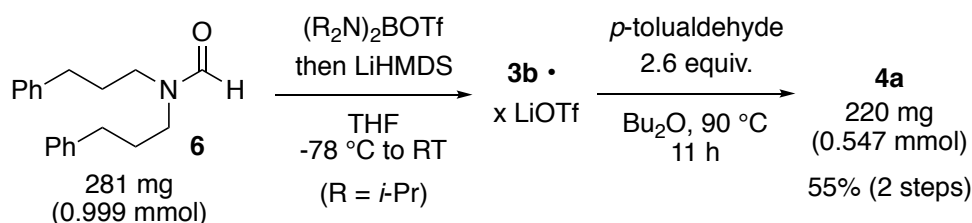

Procedure for semi large scale synthesis from formamide **6**:

(Step 1) In a two-necked flask, bis(diisopropylamino)boryl trifluoromethanesulfonate (360 mg, 1.00 mmol) was cooled to  $-78$   $^{\circ}\text{C}$ . To this was added a THF (2 mL) solution of *N,N*-bis(3-phenylpropyl)formamide (281 mg, 0.999 mmol) slowly at that temperature. The reaction mixture was warmed to room temperature and stirred for 5 minutes. The reaction mixture was

cooled to  $-78\text{ }^{\circ}\text{C}$ , then a THF solution of lithium hexamethyldisilazide (*ca.* 1.3M, 0.77 mL, 1.0 mmol) was added slowly. The mixture was warmed to room temperature slowly and stirred overnight. After solvents were removed under reduced pressure, the residue was transferred into a glove box. The product was extracted with hexane-toluene (3 : 1). After filtration, solvents were removed under reduced pressure to give a crude material (603 mg) which was used for next step.

(Step 2) In a test tube, MS4A (0.60 g) was heated with a heat-gun under reduced pressure just before use. After nitrogen was charged, the test tube was transferred into a glove box. In the glove box, dibutyl ether (6 mL) was stirred with the pre-dried MS4A overnight. To the crude material (603 mg) obtained as above was added dried dibutyl ether (2 mL, supernatant) and *p*-tolualdehyde (0.31 mL, 2.6 mmol). After the mixture was heated at  $90\text{ }^{\circ}\text{C}$  for 11 hours, the reaction was quenched with pH = 7 phosphate buffer, and organic compounds were extracted with ethyl acetate three times. Combined organic layer was washed with brine and dried over  $\text{MgSO}_4$ . Volatile materials were removed under reduced pressure, and the residue was purified by silica gel chromatography (hexane : ethyl acetate = 8 : 2) and recrystallization (hexane-ethyl acetate) to give **4a** (220 mg, 0.547 mmol) in 55% yield (2 steps).

## 4. DFT study

### 4.1 General

Calculations were performed with the Gaussian 09 (G09RevD.01) program.<sup>4</sup> Geometry optimizations and frequency calculations for all reported structures were performed using B3LYP density functional with the 6-31G(d) basis set. Each reported minimum has zero imaginary frequency and each transition state (TS) structure has only one imaginary frequency. From TSs, reaction paths were traced by the intrinsic reaction coordinate (IRC) method to obtain the energy minimum geometries. Energy changes were shown by the use of Gibbs free energies ( $T = 298.15$  K and  $P = 1$  atm).

### 4.2 Cartesian coordinates of the optimized geometries

#### PhCHO

|   |             |             |             |
|---|-------------|-------------|-------------|
| C | 1.73595853  | 1.06057288  | -0.00000202 |
| C | 0.36111895  | 1.29212797  | -0.00000060 |
| C | -0.53395208 | 0.21450824  | 0.00000222  |
| C | -0.04523859 | -1.10109692 | 0.00000313  |
| C | 1.32623032  | -1.33125049 | 0.00000069  |
| C | 2.21681882  | -0.25080975 | -0.00000146 |
| H | 2.43030489  | 1.89611137  | -0.00000357 |
| H | -0.02496654 | 2.30955847  | -0.00000075 |
| H | -0.75908815 | -1.91924389 | 0.00000562  |
| H | 1.70780067  | -2.34857909 | 0.00000101  |
| H | 3.28820061  | -0.43340758 | -0.00000328 |
| C | -1.99221856 | 0.46875433  | 0.00000536  |
| H | -2.27407085 | 1.54572777  | 0.00001379  |
| O | -2.84756061 | -0.39587557 | -0.00000710 |

#### CB

|   |             |             |             |
|---|-------------|-------------|-------------|
| C | 0.98782336  | 0.00865251  | -0.60888116 |
| O | 1.24862995  | -0.03743881 | -1.81839669 |
| N | 1.99603042  | 0.03690603  | 0.33495765  |
| B | -0.56638813 | 0.00625168  | -0.16320641 |
| N | -1.23423415 | 1.26147865  | -0.04908088 |

|   |             |             |             |
|---|-------------|-------------|-------------|
| N | -1.19325387 | -1.26653390 | 0.01584000  |
| C | 3.38682697  | -0.00079695 | -0.08430930 |
| H | 3.88122921  | -0.91265281 | 0.27916135  |
| H | 3.40659908  | 0.01380077  | -1.17446252 |
| H | 3.93524595  | 0.86585837  | 0.30854836  |
| C | 1.74546799  | 0.02193496  | 1.76183411  |
| H | 0.67032095  | 0.04626313  | 1.95411546  |
| H | 2.15832736  | -0.88491375 | 2.22736421  |
| H | 2.20527095  | 0.89113271  | 2.25304308  |
| C | -0.51839247 | 2.52441319  | 0.06223383  |
| H | 0.55542609  | 2.35526409  | 0.15619002  |
| H | -0.68941571 | 3.15857132  | -0.82091847 |
| H | -0.85241708 | 3.09157179  | 0.94490121  |
| C | -2.66520507 | 1.46459798  | -0.22464353 |
| H | -3.14884254 | 0.55118591  | -0.57109764 |
| H | -3.16216491 | 1.79839741  | 0.70027994  |
| H | -2.83903350 | 2.24036281  | -0.98504473 |
| C | -2.41643099 | -1.50482188 | 0.76479842  |
| H | -2.70061770 | -0.62218121 | 1.33992507  |
| H | -3.26324064 | -1.79114501 | 0.12002542  |
| H | -2.26134053 | -2.32963750 | 1.47694340  |
| C | -0.62039070 | -2.50075729 | -0.50531532 |
| H | 0.25821370  | -2.29012267 | -1.11536175 |
| H | -0.34005659 | -3.19121394 | 0.30629978  |
| H | -1.34859426 | -3.02457993 | -1.14302629 |

**TS1**

|   |             |             |             |
|---|-------------|-------------|-------------|
| C | -1.06157364 | -0.06276476 | 0.10405212  |
| O | -0.50410026 | 0.07110347  | -1.08398218 |
| N | -2.38930007 | -0.02690913 | 0.17163850  |
| B | 0.70474535  | 0.00070757  | -0.17048536 |
| N | 1.41139015  | -1.25609793 | 0.01635500  |
| N | 1.40080011  | 1.25368950  | 0.02495807  |
| C | -3.05042904 | -0.17251155 | 1.45988719  |
| H | -3.70823529 | -1.05103650 | 1.45974860  |

|   |             |             |             |
|---|-------------|-------------|-------------|
| H | -2.28516806 | -0.29106889 | 2.22809137  |
| H | -3.65808471 | 0.71361240  | 1.68327183  |
| C | -3.24684413 | 0.15258134  | -1.00162028 |
| H | -2.61531758 | 0.26450504  | -1.88272748 |
| H | -3.90258024 | -0.71686548 | -1.12908221 |
| H | -3.87074377 | 1.04602192  | -0.88049044 |
| C | 0.94779145  | 2.50036667  | -0.55738217 |
| H | 0.28692099  | 2.30770160  | -1.40455191 |
| H | 0.40133489  | 3.12908352  | 0.17020227  |
| H | 1.80061905  | 3.09517069  | -0.91930207 |
| C | 2.29135014  | 1.44992819  | 1.15302361  |
| H | 2.52928148  | 0.49039226  | 1.61618500  |
| H | 3.23334718  | 1.93456345  | 0.84979424  |
| H | 1.83048173  | 2.09362546  | 1.92370402  |
| C | 2.78966445  | -1.40942776 | -0.41582931 |
| H | 3.24192288  | -0.43125451 | -0.58920086 |
| H | 3.39258342  | -1.94484277 | 0.33565941  |
| H | 2.86337044  | -1.98459899 | -1.35639023 |
| C | 0.72721153  | -2.52450667 | 0.14846021  |
| H | 1.30002296  | -3.20591761 | 0.79661892  |
| H | -0.25526697 | -2.37601885 | 0.60581632  |
| H | 0.58133107  | -3.04220813 | -0.81727176 |

## INT1

|   |             |             |             |
|---|-------------|-------------|-------------|
| C | 1.43454215  | 0.34490506  | -0.46306739 |
| O | 0.50475434  | -0.33015268 | 0.26597331  |
| N | 2.66030783  | -0.06440661 | -0.10256308 |
| B | -0.87046141 | -0.03106590 | 0.08454583  |
| N | -1.33068006 | 1.31786605  | 0.12624546  |
| N | -1.72782320 | -1.16444964 | -0.05579908 |
| C | 2.99787021  | -1.06082382 | 0.91944481  |
| H | 3.64901743  | -0.61395941 | 1.68106395  |
| H | 2.08120794  | -1.41693316 | 1.38587931  |
| H | 3.53183292  | -1.90530326 | 0.46571263  |
| C | 3.79458464  | 0.52766746  | -0.79509233 |

|   |             |             |             |
|---|-------------|-------------|-------------|
| H | 4.45881684  | 1.04050059  | -0.08637804 |
| H | 4.37948761  | -0.24335506 | -1.31456791 |
| H | 3.40771672  | 1.24456403  | -1.52019101 |
| C | -1.23620953 | -2.46428826 | -0.48043737 |
| H | -0.17243196 | -2.40742663 | -0.71273889 |
| H | -1.37932311 | -3.22374539 | 0.30492381  |
| H | -1.77027716 | -2.81650619 | -1.37703718 |
| C | -3.13563140 | -1.17819701 | 0.29637141  |
| H | -3.41575592 | -0.24872866 | 0.79490657  |
| H | -3.79029071 | -1.31715949 | -0.57949943 |
| H | -3.34442691 | -2.00756161 | 0.99008082  |
| C | -2.48950536 | 1.79941130  | -0.60497062 |
| H | -2.94927925 | 0.99298879  | -1.17850184 |
| H | -3.25310384 | 2.23571495  | 0.05930241  |
| H | -2.19038999 | 2.58492354  | -1.31663626 |
| C | -0.55015501 | 2.39881295  | 0.70692708  |
| H | 0.25589234  | 2.00178920  | 1.32523011  |
| H | -0.09928345 | 3.03929927  | -0.06514378 |
| H | -1.19074340 | 3.02945476  | 1.34284232  |

## TS2

|   |             |             |             |
|---|-------------|-------------|-------------|
| C | 0.06318088  | 1.37635995  | 0.07258527  |
| O | 1.31141192  | 1.07037080  | 0.32751862  |
| N | -0.29193989 | 2.57710529  | 0.52879568  |
| B | 1.99593811  | -0.20113458 | 0.15937482  |
| N | 1.80230709  | -1.17811322 | 1.18579295  |
| N | 3.08398065  | -0.18678829 | -0.75913527 |
| C | -0.67110086 | -0.08056592 | -1.34178190 |
| O | 0.30692409  | -0.85363447 | -1.38715795 |
| C | -1.64826256 | 3.06144474  | 0.30467295  |
| H | -2.11332519 | 3.32931759  | 1.26125860  |
| H | -1.63674594 | 3.95361931  | -0.33446316 |
| H | -2.23724794 | 2.27714040  | -0.16725149 |
| C | 0.58981136  | 3.49759997  | 1.25831930  |
| H | 0.62411669  | 4.46302782  | 0.74010916  |



|   |             |             |             |
|---|-------------|-------------|-------------|
| H | 0.20548433  | 3.66136381  | 2.27211229  |
| H | 1.59072695  | 3.07415961  | 1.30893366  |
| C | 1.16774775  | -0.88758260 | 2.45766421  |
| H | 1.12009369  | 0.19021414  | 2.62589640  |
| H | 0.14246931  | -1.28942429 | 2.51588949  |
| H | 1.73972260  | -1.33331623 | 3.28653683  |
| C | 1.95606126  | -2.60063881 | 0.93921657  |
| H | 2.27083204  | -2.77962106 | -0.08907455 |
| H | 2.68606681  | -3.06399766 | 1.62264132  |
| H | 0.99691232  | -3.12365300 | 1.08107431  |
| C | 4.22740187  | -1.07288360 | -0.67188573 |
| H | 4.31998335  | -1.47387330 | 0.33952341  |
| H | 4.17252100  | -1.91806464 | -1.37878951 |
| H | 5.15053346  | -0.51942645 | -0.90171883 |
| C | 3.01519535  | 0.54525271  | -2.01114044 |
| H | 2.80049267  | -0.12027782 | -2.86063961 |
| H | 2.22420365  | 1.29555696  | -1.96984225 |
| H | 3.96812159  | 1.05871630  | -2.20954768 |
| H | -0.79219956 | 0.71712712  | -2.10610443 |
| C | -1.99229977 | -0.51794256 | -0.76047979 |
| C | -3.18791555 | 0.07297043  | -1.18414566 |
| C | -2.04497597 | -1.58347019 | 0.14596043  |
| C | -4.41631995 | -0.36590135 | -0.68496500 |
| H | -3.15608882 | 0.87036195  | -1.92575130 |
| C | -3.26770528 | -2.02073577 | 0.65029882  |
| H | -1.11359800 | -2.06254621 | 0.43054340  |
| C | -4.45773385 | -1.41007399 | 0.24028762  |
| H | -5.33856917 | 0.09823586  | -1.02575092 |
| H | -3.29832632 | -2.84544779 | 1.35831582  |
| H | -5.41150112 | -1.75583472 | 0.63052606  |

**Pro**

|   |             |            |             |
|---|-------------|------------|-------------|
| C | 0.19504161  | 1.11876980 | -0.72292081 |
| O | -0.51621562 | 0.77476654 | -1.66378081 |
| N | 0.78522135  | 2.35450157 | -0.66838715 |

|   |             |             |             |
|---|-------------|-------------|-------------|
| B | -1.86374263 | -0.69445740 | 0.32080889  |
| N | -2.60432156 | -1.60348802 | -0.48601910 |
| N | -2.48788902 | 0.35487735  | 1.09117383  |
| C | 0.46109475  | 0.12656700  | 0.44397257  |
| O | -0.48079956 | -0.92229349 | 0.40760173  |
| C | 1.60638202  | 2.85053754  | 0.42555273  |
| H | 2.42424212  | 3.45169594  | 0.01187211  |
| H | 1.02952369  | 3.48881198  | 1.11094313  |
| H | 2.05643260  | 2.03443047  | 0.98811486  |
| C | 0.49234790  | 3.31932961  | -1.72048734 |
| H | -0.01302867 | 4.20125731  | -1.30405579 |
| H | 1.42025622  | 3.64936516  | -2.20478645 |
| H | -0.15512003 | 2.84324065  | -2.45499746 |
| C | -1.98770098 | -2.36901272 | -1.55583965 |
| H | -0.94744048 | -2.06882813 | -1.67001804 |
| H | -2.02627016 | -3.45053639 | -1.34950992 |
| H | -2.50808836 | -2.19500769 | -2.51051021 |
| C | -4.01016242 | -1.90364906 | -0.30106740 |
| H | -4.38971425 | -1.42039767 | 0.60105428  |
| H | -4.62443767 | -1.57780359 | -1.15669042 |
| H | -4.16075784 | -2.98915935 | -0.19066098 |
| C | -3.62535146 | 1.12349862  | 0.62452846  |
| H | -3.85912830 | 0.85950763  | -0.40861884 |
| H | -4.52743833 | 0.96492217  | 1.23981717  |
| H | -3.40244088 | 2.20280131  | 0.65165078  |
| C | -2.03604916 | 0.73401639  | 2.41450241  |
| H | -2.85995319 | 0.67735061  | 3.14475172  |
| H | -1.25016178 | 0.05561551  | 2.75638875  |
| H | -1.64825471 | 1.76765766  | 2.45137182  |
| H | 0.39106607  | 0.67104388  | 1.39417778  |
| C | 1.85011993  | -0.49182849 | 0.33948371  |
| C | 2.66133714  | -0.61381250 | 1.47256572  |
| C | 2.31407830  | -0.99011087 | -0.88517680 |
| C | 3.91897365  | -1.21539204 | 1.38725901  |
| H | 2.30225772  | -0.24497789 | 2.43143830  |
| C | 3.56815526  | -1.59251686 | -0.97222068 |

|   |            |             |             |
|---|------------|-------------|-------------|
| H | 1.68489724 | -0.90344970 | -1.76655955 |
| C | 4.37500583 | -1.70511543 | 0.16328120  |
| H | 4.53749935 | -1.30464737 | 2.27650570  |
| H | 3.91731590 | -1.97507532 | -1.92776545 |
| H | 5.35286881 | -2.17423676 | 0.09350299  |

### TS3

|   |             |             |             |
|---|-------------|-------------|-------------|
| C | 0.66178194  | 0.20705668  | -0.98056111 |
| C | -0.53088939 | -0.72476710 | 0.81991498  |
| H | 0.31083090  | -0.62816098 | -1.58851461 |
| O | -0.10049578 | 1.26014738  | -0.88424178 |
| B | -1.36112947 | 0.64253488  | -0.26936301 |
| C | -1.04138968 | 2.65264549  | 1.29013606  |
| H | -0.40160606 | 3.08358689  | 0.51940054  |
| H | -1.67612173 | 3.45311459  | 1.69695248  |
| H | -0.40969657 | 2.26969376  | 2.10738535  |
| C | -2.83014054 | 1.14179306  | 1.73252921  |
| H | -2.31072271 | 0.69385971  | 2.59651448  |
| H | -3.43221954 | 1.98530497  | 2.09817896  |
| H | -3.51261359 | 0.39746776  | 1.32115825  |
| C | -2.45677158 | 0.94630453  | -2.48539532 |
| H | -1.52821267 | 1.44193689  | -2.77941967 |
| H | -2.82607669 | 0.36816974  | -3.34470620 |
| H | -3.20175451 | 1.73337535  | -2.26709162 |
| C | -3.44611222 | -0.64765578 | -1.00218433 |
| H | -4.28528521 | 0.02934247  | -0.75865738 |
| H | -3.77620069 | -1.27265795 | -1.84607134 |
| H | -3.28171536 | -1.30498010 | -0.14349055 |
| N | -1.88767625 | 1.60948311  | 0.72754470  |
| N | -2.22417613 | 0.06191752  | -1.34627895 |
| O | -0.07508117 | -0.28907136 | 1.88029613  |
| C | -0.96459793 | -2.74193864 | -0.60321707 |
| H | -1.26635002 | -2.00529512 | -1.34817124 |
| H | -0.05657259 | -3.26639325 | -0.94437418 |
| H | -1.76009192 | -3.49292043 | -0.50974655 |

|   |             |             |             |
|---|-------------|-------------|-------------|
| C | -0.40713433 | -2.97766944 | 1.77813895  |
| H | -0.31262804 | -2.38266771 | 2.68561491  |
| H | -1.19553997 | -3.73068832 | 1.90076958  |
| H | 0.54270728  | -3.50284197 | 1.59588793  |
| N | -0.73652082 | -2.08611279 | 0.67160096  |
| C | 2.05921026  | 0.24834440  | -0.62461779 |
| C | 2.90223777  | -0.81072459 | -1.01784352 |
| C | 2.59100373  | 1.32312502  | 0.11546886  |
| C | 4.25244819  | -0.78917730 | -0.69007961 |
| H | 2.48829148  | -1.64053226 | -1.58564272 |
| C | 3.94191704  | 1.33808881  | 0.43960005  |
| H | 1.92954249  | 2.12176514  | 0.43026189  |
| C | 4.77324226  | 0.28593886  | 0.03837726  |
| H | 4.90108824  | -1.60395817 | -0.99849665 |
| H | 4.35250767  | 2.16511735  | 1.01167542  |
| H | 5.82848215  | 0.30188018  | 0.29729638  |

**CS**

|    |             |             |             |
|----|-------------|-------------|-------------|
| C  | 0.64003656  | -0.55197680 | 0.00001340  |
| Si | -1.20421341 | 0.06583766  | -0.00007046 |
| O  | 0.66414966  | -1.79078054 | 0.00017918  |
| N  | 1.80306220  | 0.17751534  | -0.00005953 |
| C  | -1.94338380 | -0.70338401 | -1.55914892 |
| H  | -1.69386381 | -1.76778222 | -1.60554512 |
| H  | -3.03547151 | -0.60208626 | -1.56815200 |
| H  | -1.55845501 | -0.22606043 | -2.46835381 |
| C  | -1.94329965 | -0.70225754 | 1.55962014  |
| H  | -1.55789962 | -0.22458371 | 2.46844138  |
| H  | -3.03533339 | -0.60033797 | 1.56882616  |
| H  | -1.69437720 | -1.76676782 | 1.60662974  |
| C  | -1.59435738 | 1.92735410  | -0.00045118 |
| H  | -1.21416433 | 2.44579191  | -0.88849958 |
| H  | -2.68566849 | 2.05069661  | -0.00070317 |
| H  | -1.21459099 | 2.44580019  | 0.88778430  |
| C  | 1.87364682  | 1.62442860  | -0.00016110 |

|   |            |             |             |
|---|------------|-------------|-------------|
| H | 0.87436113 | 2.05493866  | -0.00002723 |
| H | 2.40972410 | 1.98860500  | 0.88762485  |
| H | 2.40945527 | 1.98851920  | -0.88814952 |
| C | 3.08349294 | -0.51753883 | 0.00008431  |
| H | 3.66727753 | -0.24781079 | 0.89028733  |
| H | 2.88883778 | -1.58952670 | -0.00028055 |
| H | 3.66771077 | -0.24723897 | -0.88965296 |

#### TS4

|    |             |             |             |
|----|-------------|-------------|-------------|
| C  | 0.70572001  | -0.07665911 | 0.03305276  |
| Si | -1.26132322 | 0.05015415  | 0.01220721  |
| O  | 0.14806534  | -1.25606677 | -0.01777378 |
| N  | 2.03374289  | 0.03301922  | -0.01754918 |
| C  | 2.90685483  | -1.13559363 | -0.11640590 |
| H  | 3.50404903  | -1.08752921 | -1.03484599 |
| H  | 3.58723893  | -1.17471566 | 0.74251510  |
| H  | 2.28374766  | -2.03027097 | -0.13183579 |
| C  | 2.66405388  | 1.34228692  | 0.02909126  |
| H  | 3.25835776  | 1.51765276  | -0.87673889 |
| H  | 1.88562459  | 2.10354192  | 0.10130552  |
| H  | 3.32905459  | 1.42084859  | 0.89864681  |
| C  | -2.55212520 | -1.20548837 | -0.61611220 |
| H  | -2.56837664 | -2.10924109 | 0.00405845  |
| H  | -3.55939555 | -0.76849737 | -0.61334264 |
| H  | -2.33443973 | -1.52114474 | -1.64439894 |
| C  | -1.67227354 | 0.44859102  | 1.81443410  |
| H  | -1.10783702 | 1.31037434  | 2.18733103  |
| H  | -2.74176682 | 0.67125170  | 1.91820050  |
| H  | -1.45036568 | -0.40658099 | 2.46390637  |
| C  | -1.55305637 | 1.55808793  | -1.11744694 |
| H  | -1.19142310 | 1.36215798  | -2.13565892 |
| H  | -2.62292087 | 1.79258716  | -1.19635025 |
| H  | -1.02878665 | 2.44745847  | -0.74833736 |

**INT2**

|    |             |             |             |
|----|-------------|-------------|-------------|
| C  | 1.02066971  | -0.50877582 | -0.00017218 |
| Si | -1.51324664 | -0.03063430 | -0.00001801 |
| O  | 0.11496238  | 0.50564718  | -0.00000849 |
| N  | 2.26600174  | -0.02167393 | -0.00012282 |
| C  | -2.50187560 | 1.57283513  | 0.00282911  |
| H  | -3.57975016 | 1.36867125  | 0.00313937  |
| H  | -2.27834975 | 2.17882336  | 0.88864532  |
| H  | -2.27934922 | 2.18150616  | -0.88139895 |
| C  | -1.85778772 | -1.02677220 | 1.55766272  |
| H  | -2.90312062 | -1.35870914 | 1.59109242  |
| H  | -1.21466890 | -1.91143247 | 1.60060087  |
| H  | -1.66863299 | -0.42881334 | 2.45711055  |
| C  | -1.85891840 | -1.02206029 | -1.56042996 |
| H  | -2.90422279 | -1.35408065 | -1.59396013 |
| H  | -1.67064705 | -0.42134538 | -2.45822001 |
| H  | -1.21576419 | -1.90654726 | -1.60664180 |
| C  | 2.65265596  | 1.39275272  | 0.00004610  |
| H  | 3.25401436  | 1.61966991  | -0.88886968 |
| H  | 1.75433705  | 2.00748685  | -0.00007055 |
| H  | 3.25369071  | 1.61958267  | 0.88920697  |
| C  | 3.36590983  | -0.97463198 | 0.00008403  |
| H  | 3.99621100  | -0.83983471 | -0.88897390 |
| H  | 3.99516129  | -0.84071423 | 0.89002938  |
| H  | 2.94091031  | -1.97892804 | -0.00062900 |

## 5. References

[1] C. Zha, G. B. Brown, W. J. Brouillette, *Bioorg. Med. Chem.* **2014**, *22*, 95-104.

[2] G. Wang, L. Liu, H. Wang, Y.-S. Ding, J. Zhou, S. Mao, P. Li, *J. Am. Chem. Soc.* **2017**, *139*, 91-94.

[3] Originally, an aldiminium salt was synthesized by the reaction of a formamide with a chloroborane and AgOTf. (Y. Canac, G. E. Aniol, S. Conejero, B. Donnadiou, G. Bertrand, *Eur. J. Inorg. Chem.* **2006**, 5076-5080.) In this modified procedure, aldiminium salts were generated *in-situ* by the reaction of formamides with bis(diisopropylamino)boryl trifluoromethanesulfonate.

[4] Frisch, M. J.; Trucks, G. W.; Schlegel, H. B.; Scuseria, G. E.; Robb, M. A.; Cheeseman, J. R.; Scalmani, G.; Barone, V.; Mennucci, B.; Petersson, G. A.; Nakatsuji, H.; Caricato, M.; Li, X.; Hratchian, H. P.; Izmaylov, A. F.; Bloino, J.; Zheng, G.; Sonnenberg, J. L.; Hada, M.; Ehara, M.; Toyota, K.; Fukuda, R.; Hasegawa, J.; Ishida, M.; Nakajima, T.; Honda, Y.; Kitao, O.; Nakai, H.; Vreven, T.; Montgomery, J. A., Jr.; Peralta, J. E.; Ogliaro, F.; Bearpark, M.; Heyd, J. J.; Brothers, E.; Kudin, K. N.; Staroverov, V. N.; Keith, T.; Kobayashi, R.; Normand, J.; Raghavachari, K.; Rendell, A.; Burant, J. C.; Iyengar, S. S.; Tomasi, J.; Cossi, M.; Rega, N.; Millam, N. J.; Klene, M.; Knox, J. E.; Cross, J. B.; Bakken, V.; Adamo, C.; Jaramillo, J.; Gomperts, R.; Stratmann, R. E.; Yazyev, O.; Austin, A. J.; Cammi, R.; Pomelli, C.; Ochterski, J. W.; Martin, R. L.; Morokuma, K.; Zakrzewski, V. G.; Voth, G. A.; Salvador, P.; Dannenberg, J. J.; Dapprich, S.; Daniels, A. D.; Farkas, Ö.; Foresman, J. B.; Ortiz, J. V.; Cioslowski, J.; Fox, D. J. Gaussian 09, Revision D.01; Gaussian, Inc.: Wallingford, CT, 2013.

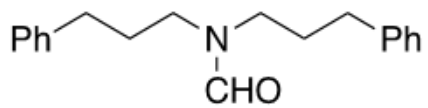

8.032  
8.024  
7.314  
7.296  
7.280  
7.277  
7.260  
7.229  
7.210  
7.205  
7.190  
7.182  
7.178  
7.161  
7.154  
7.150  
7.133

3.374  
3.355  
3.336  
3.226  
3.208  
3.190  
2.639  
2.620  
2.614  
2.599  
2.594  
2.576  
1.896  
1.890  
1.881  
1.876  
1.871  
1.864  
1.856  
1.851  
1.835  
1.817  
1.577

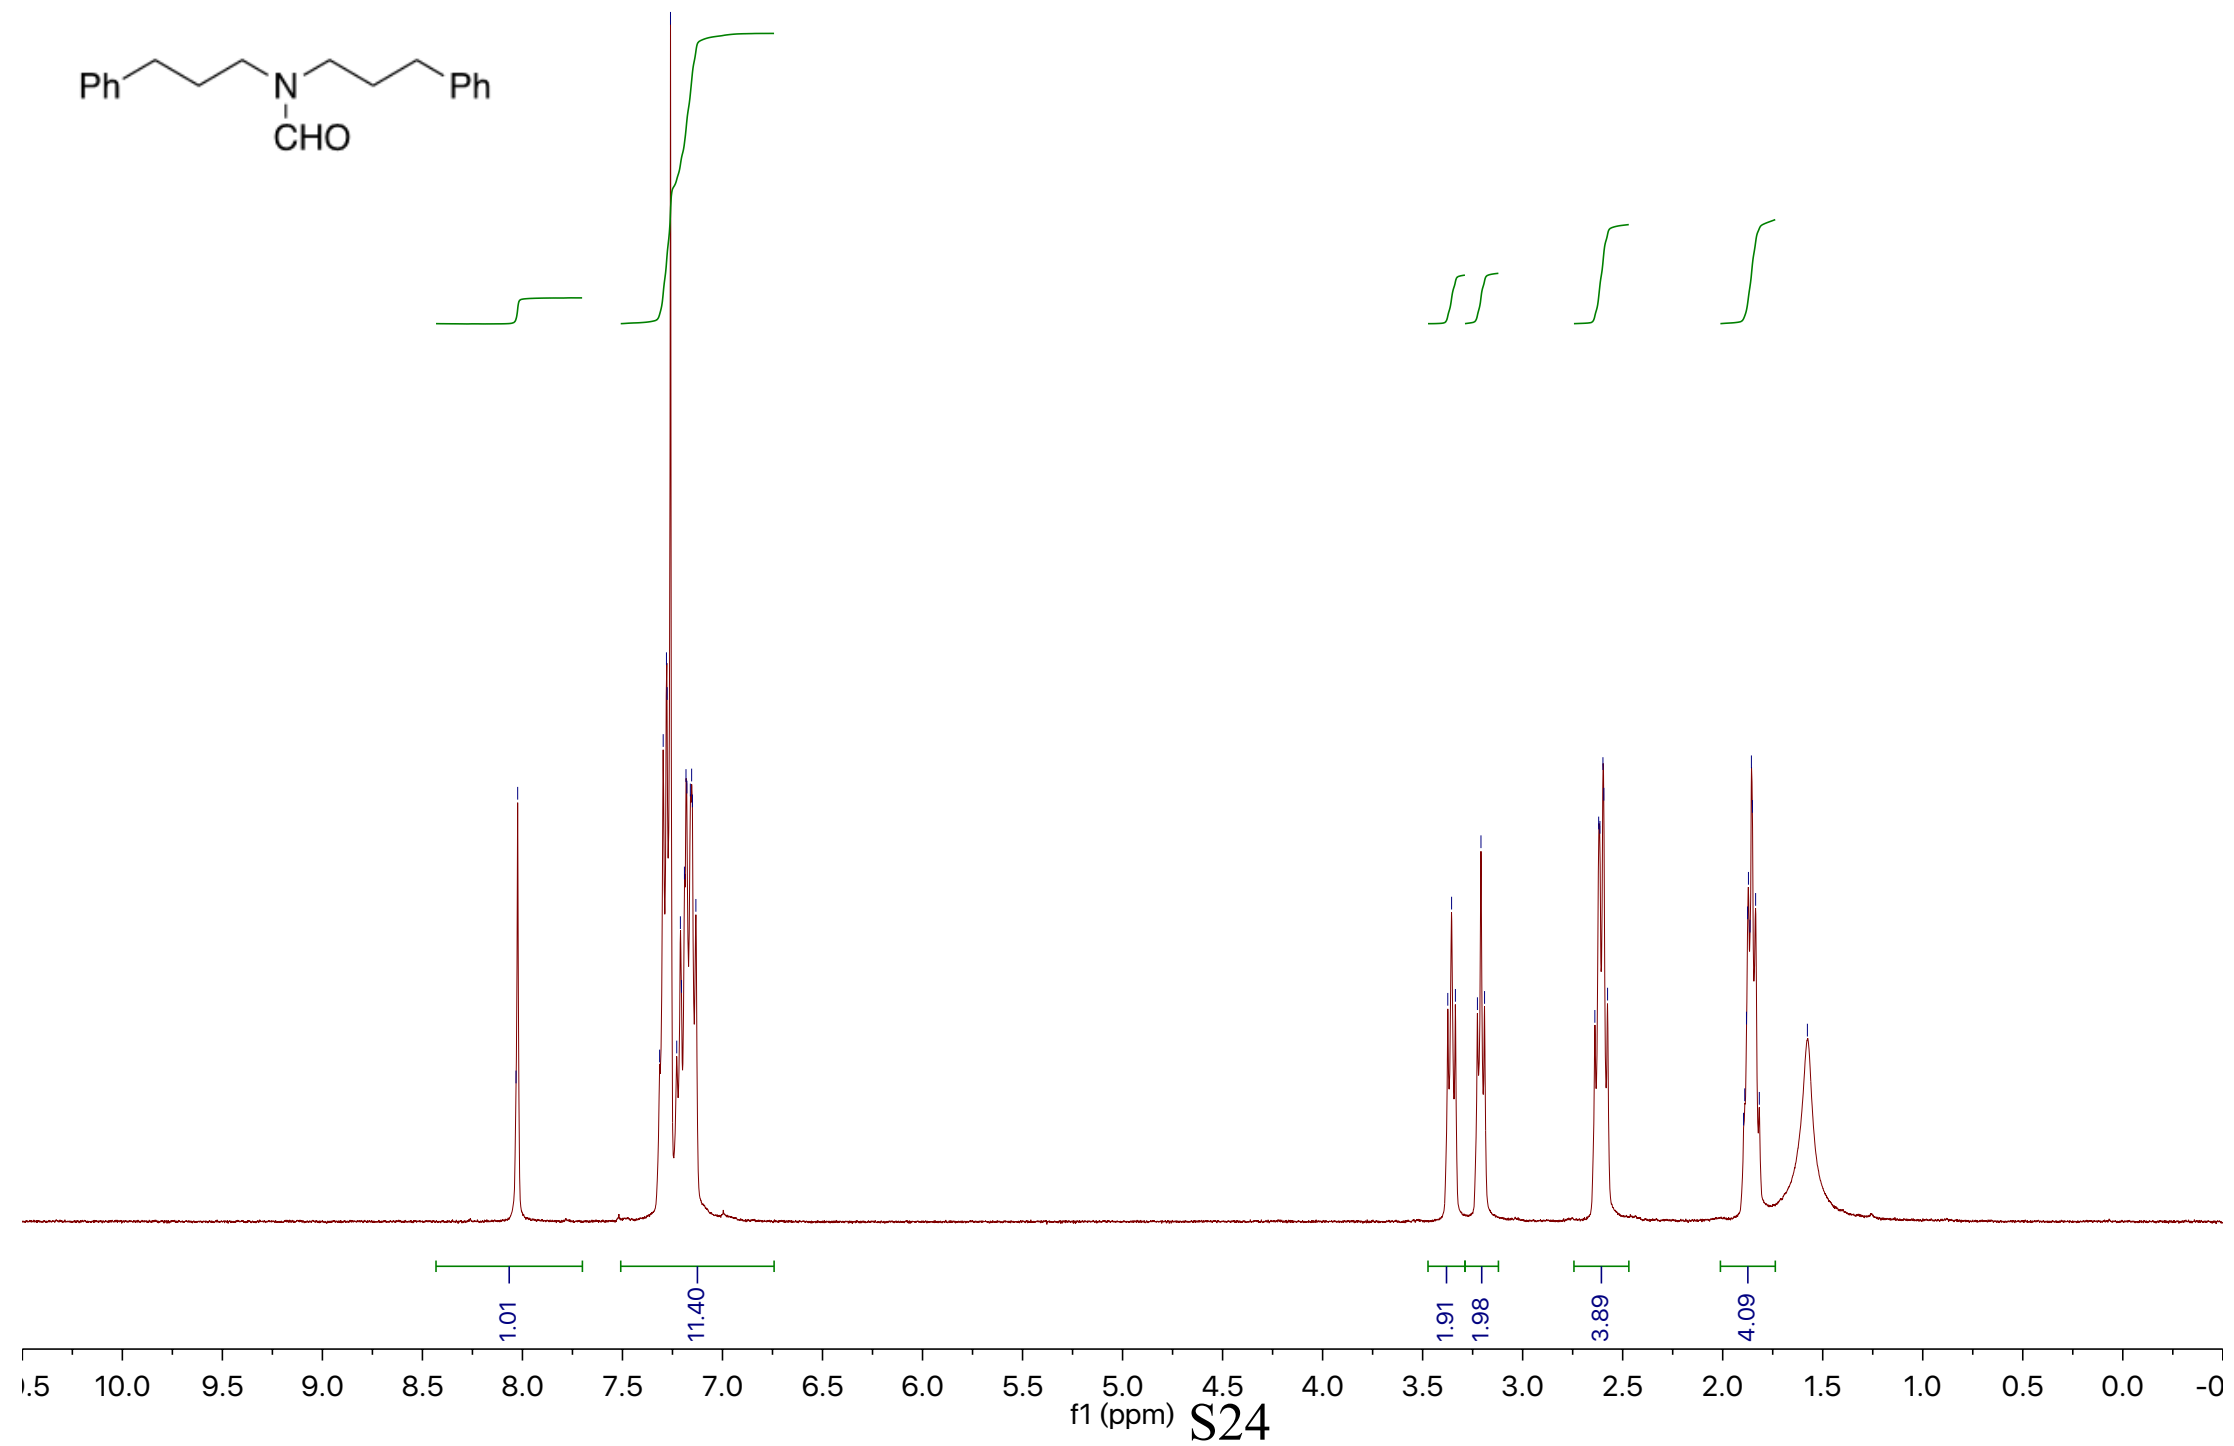



K\_ishidakento-1606-1.30.fid  
KI\_1606-1

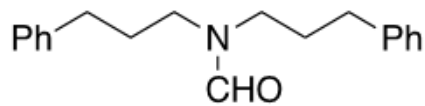

162.938

141.264

140.489

128.570

128.406

128.314

128.255

126.231

125.978

77.318

77.194

77.001

76.937

76.683

46.764

41.857

33.206

32.460

29.873

28.875

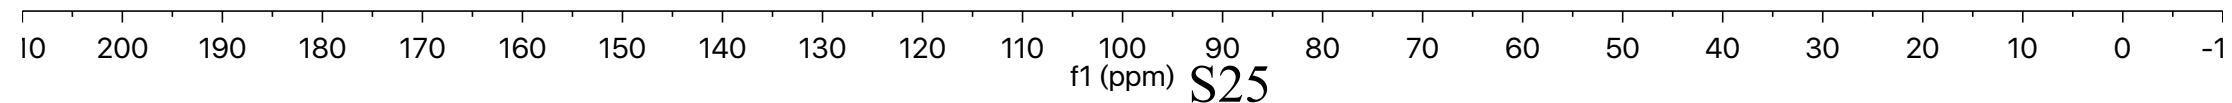

KI\_BOTf  
KI\_BOTf

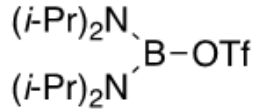

3.507  
3.491  
3.474  
3.457  
3.440  
1.376  
1.359  
1.206  
1.191  
1.189  
1.180  
1.174  
1.164  
1.152  
1.145  
1.134  
1.132  
1.128  
1.117  
1.114  
1.099  
1.082

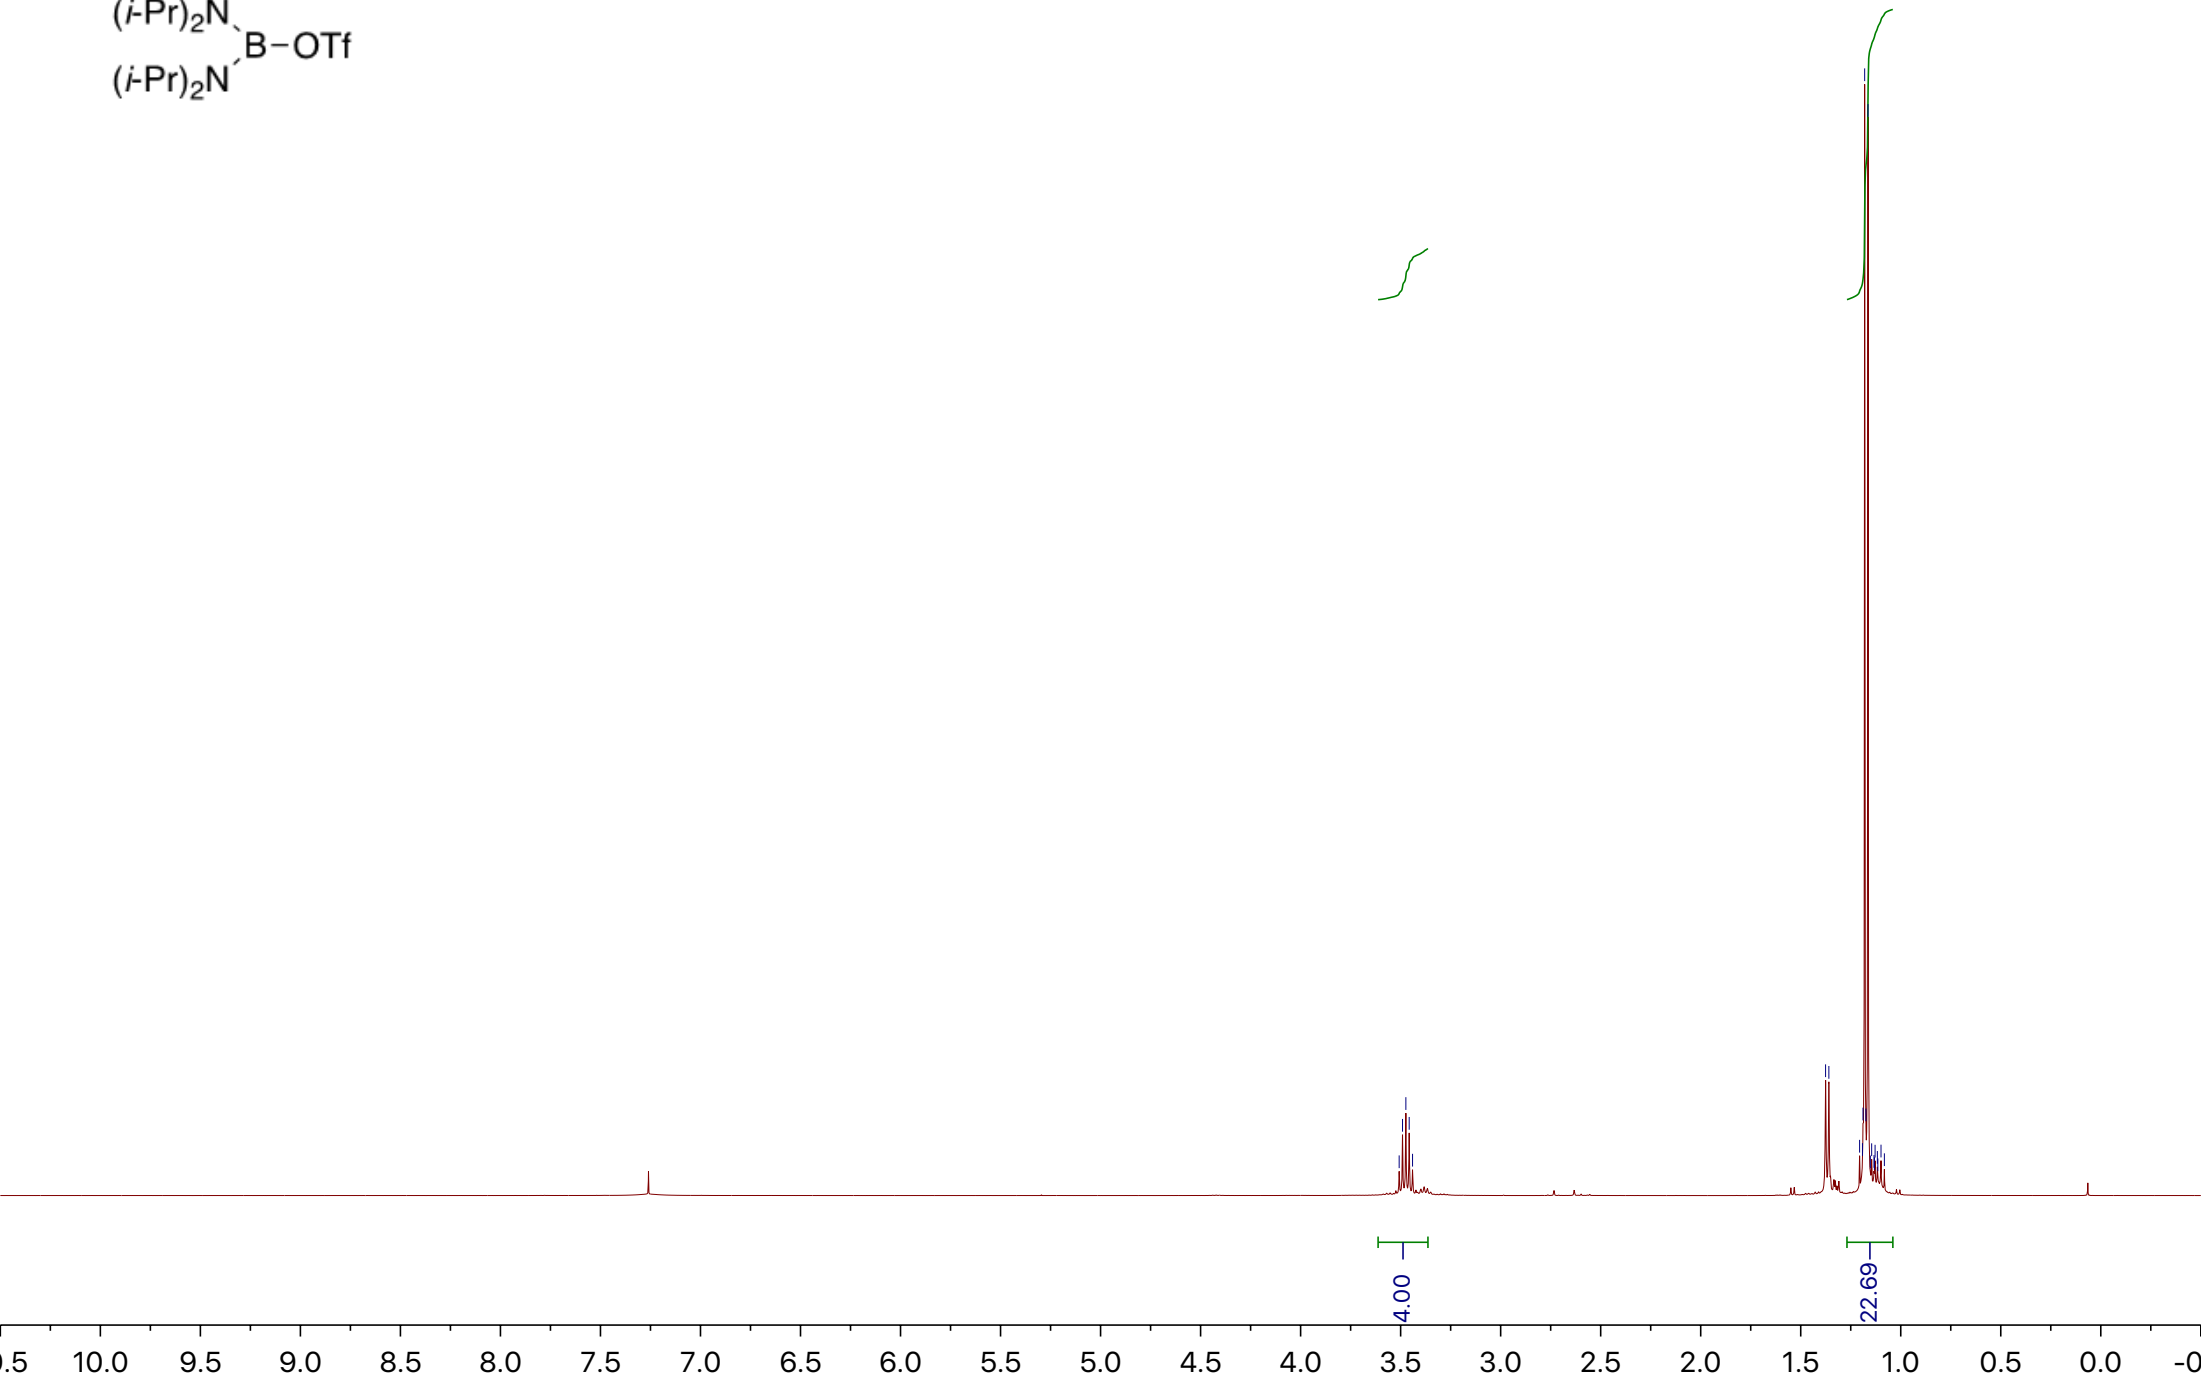

S26

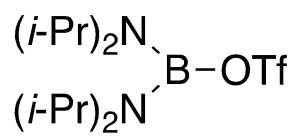

KI\_BOTf-B

Sample Name KI\_BOTf-B  
Date collected 2019-07-19

Pulse sequence s2pul  
Solvent cdcl3

Temperature 160  
Spectrometer Varian400-vnmrs400

Study owner vnmr1  
Operator vnmr1

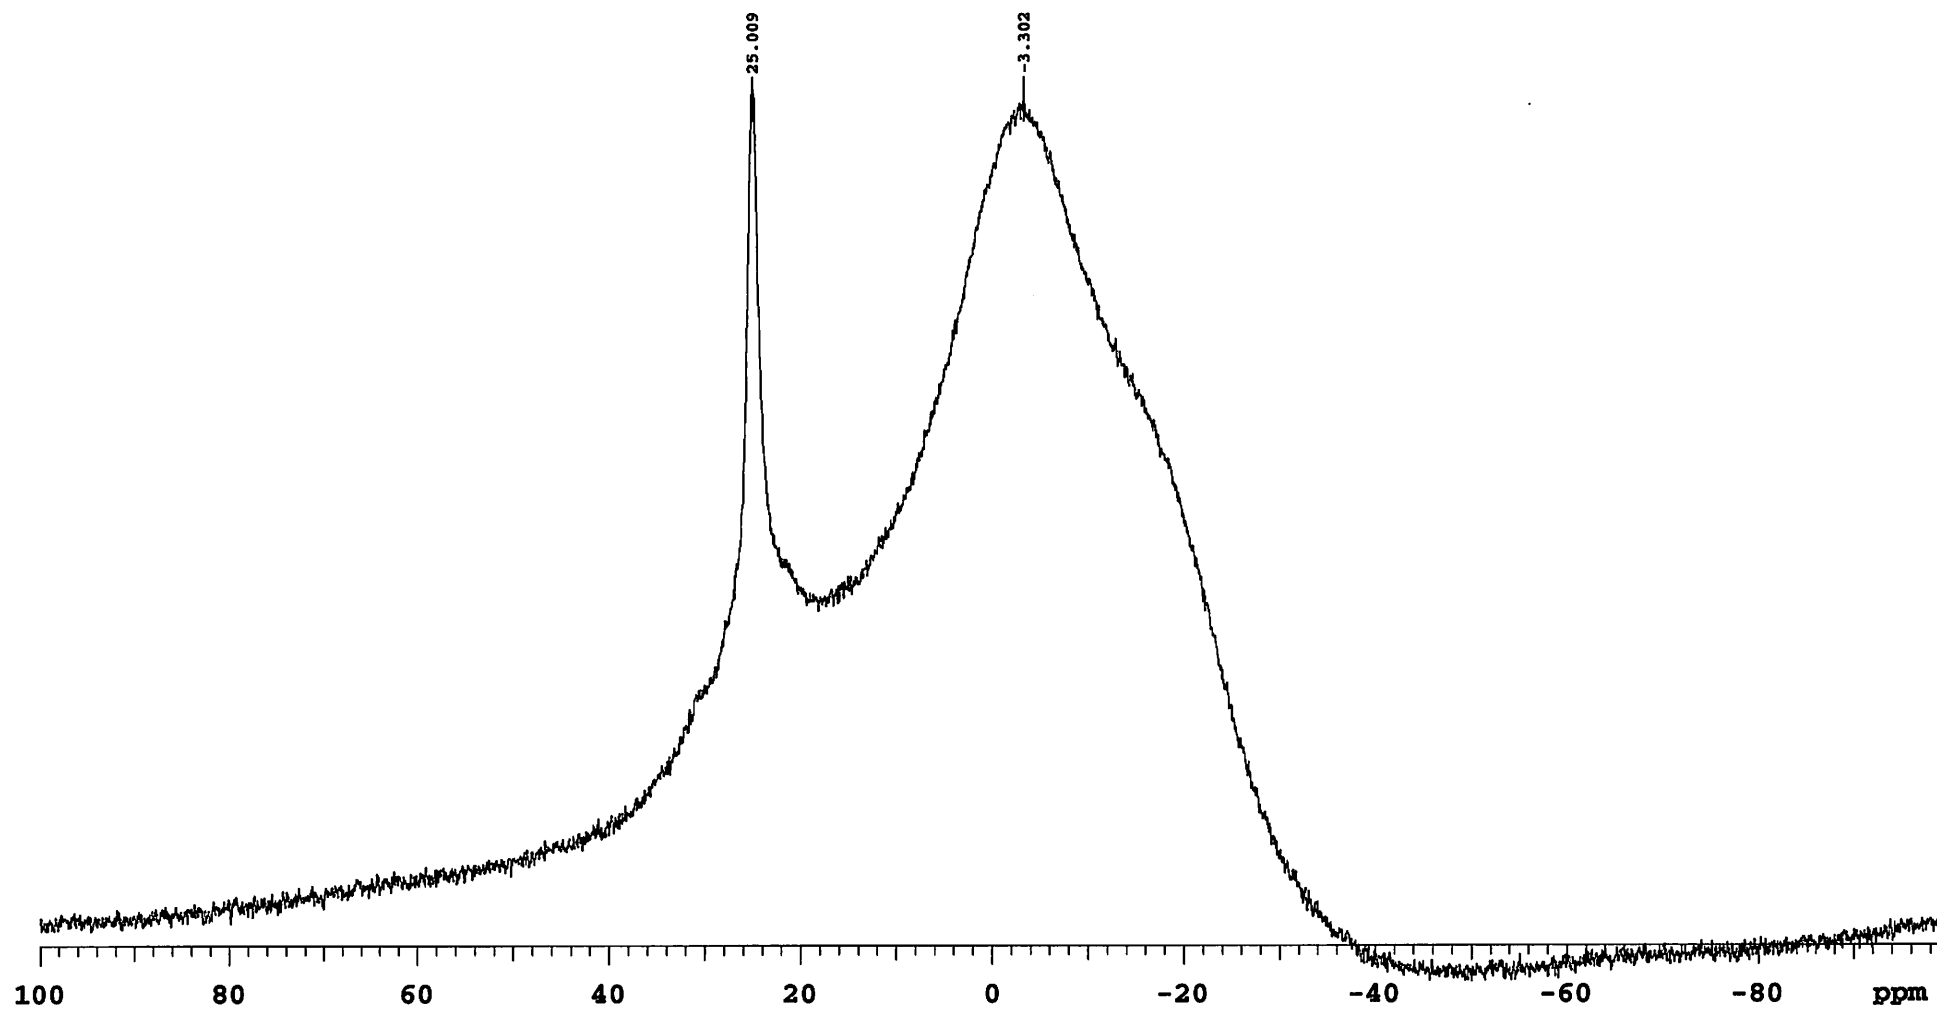

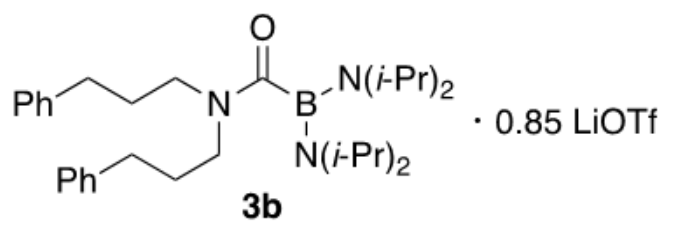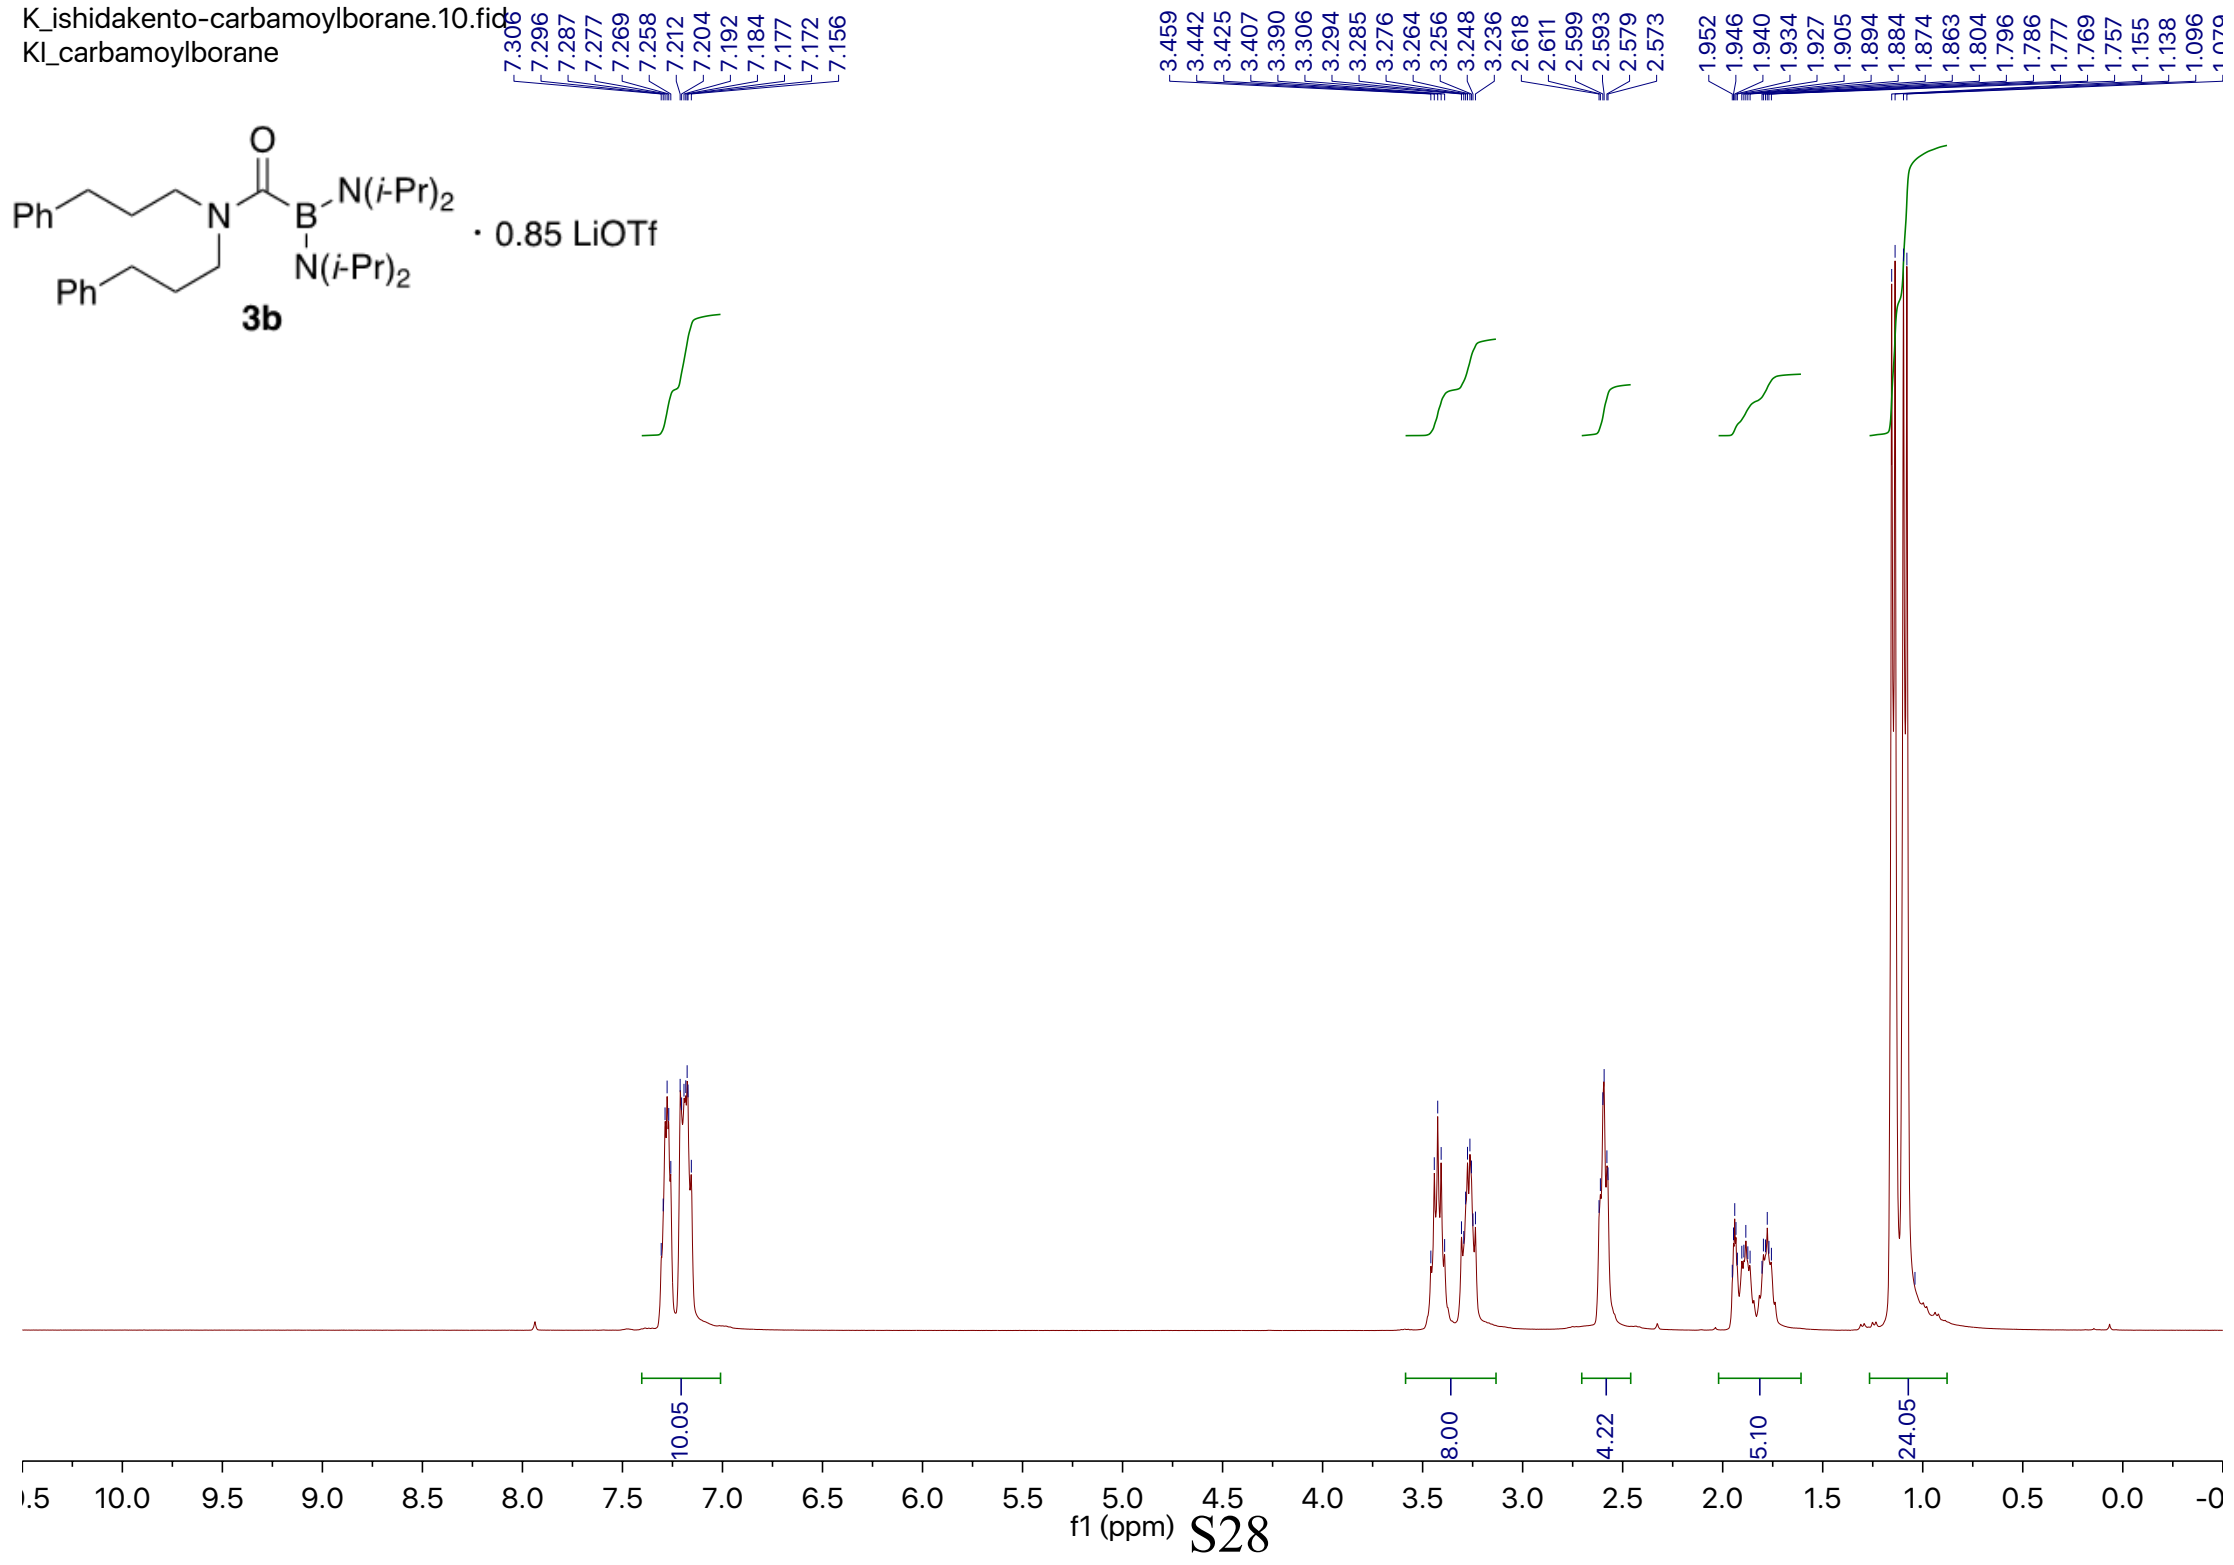

K\_ishidakento-carbamoylborane2.20.fid  
KI\_carbamoylborane

142.994  
142.330  
129.376  
129.325  
129.292  
129.215  
126.939  
126.758  
118.260

50.477  
48.422  
42.559  
34.171  
34.009  
30.327  
29.390  
24.606  
24.340  
1.900  
1.693  
1.637  
1.487  
1.428  
1.280  
1.222  
1.073  
1.003  
0.868  
0.661

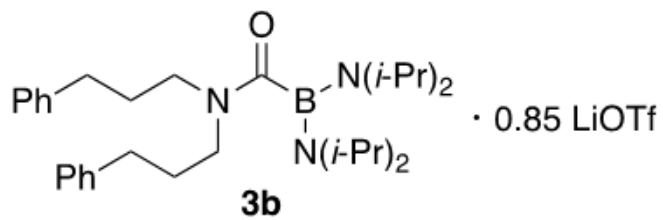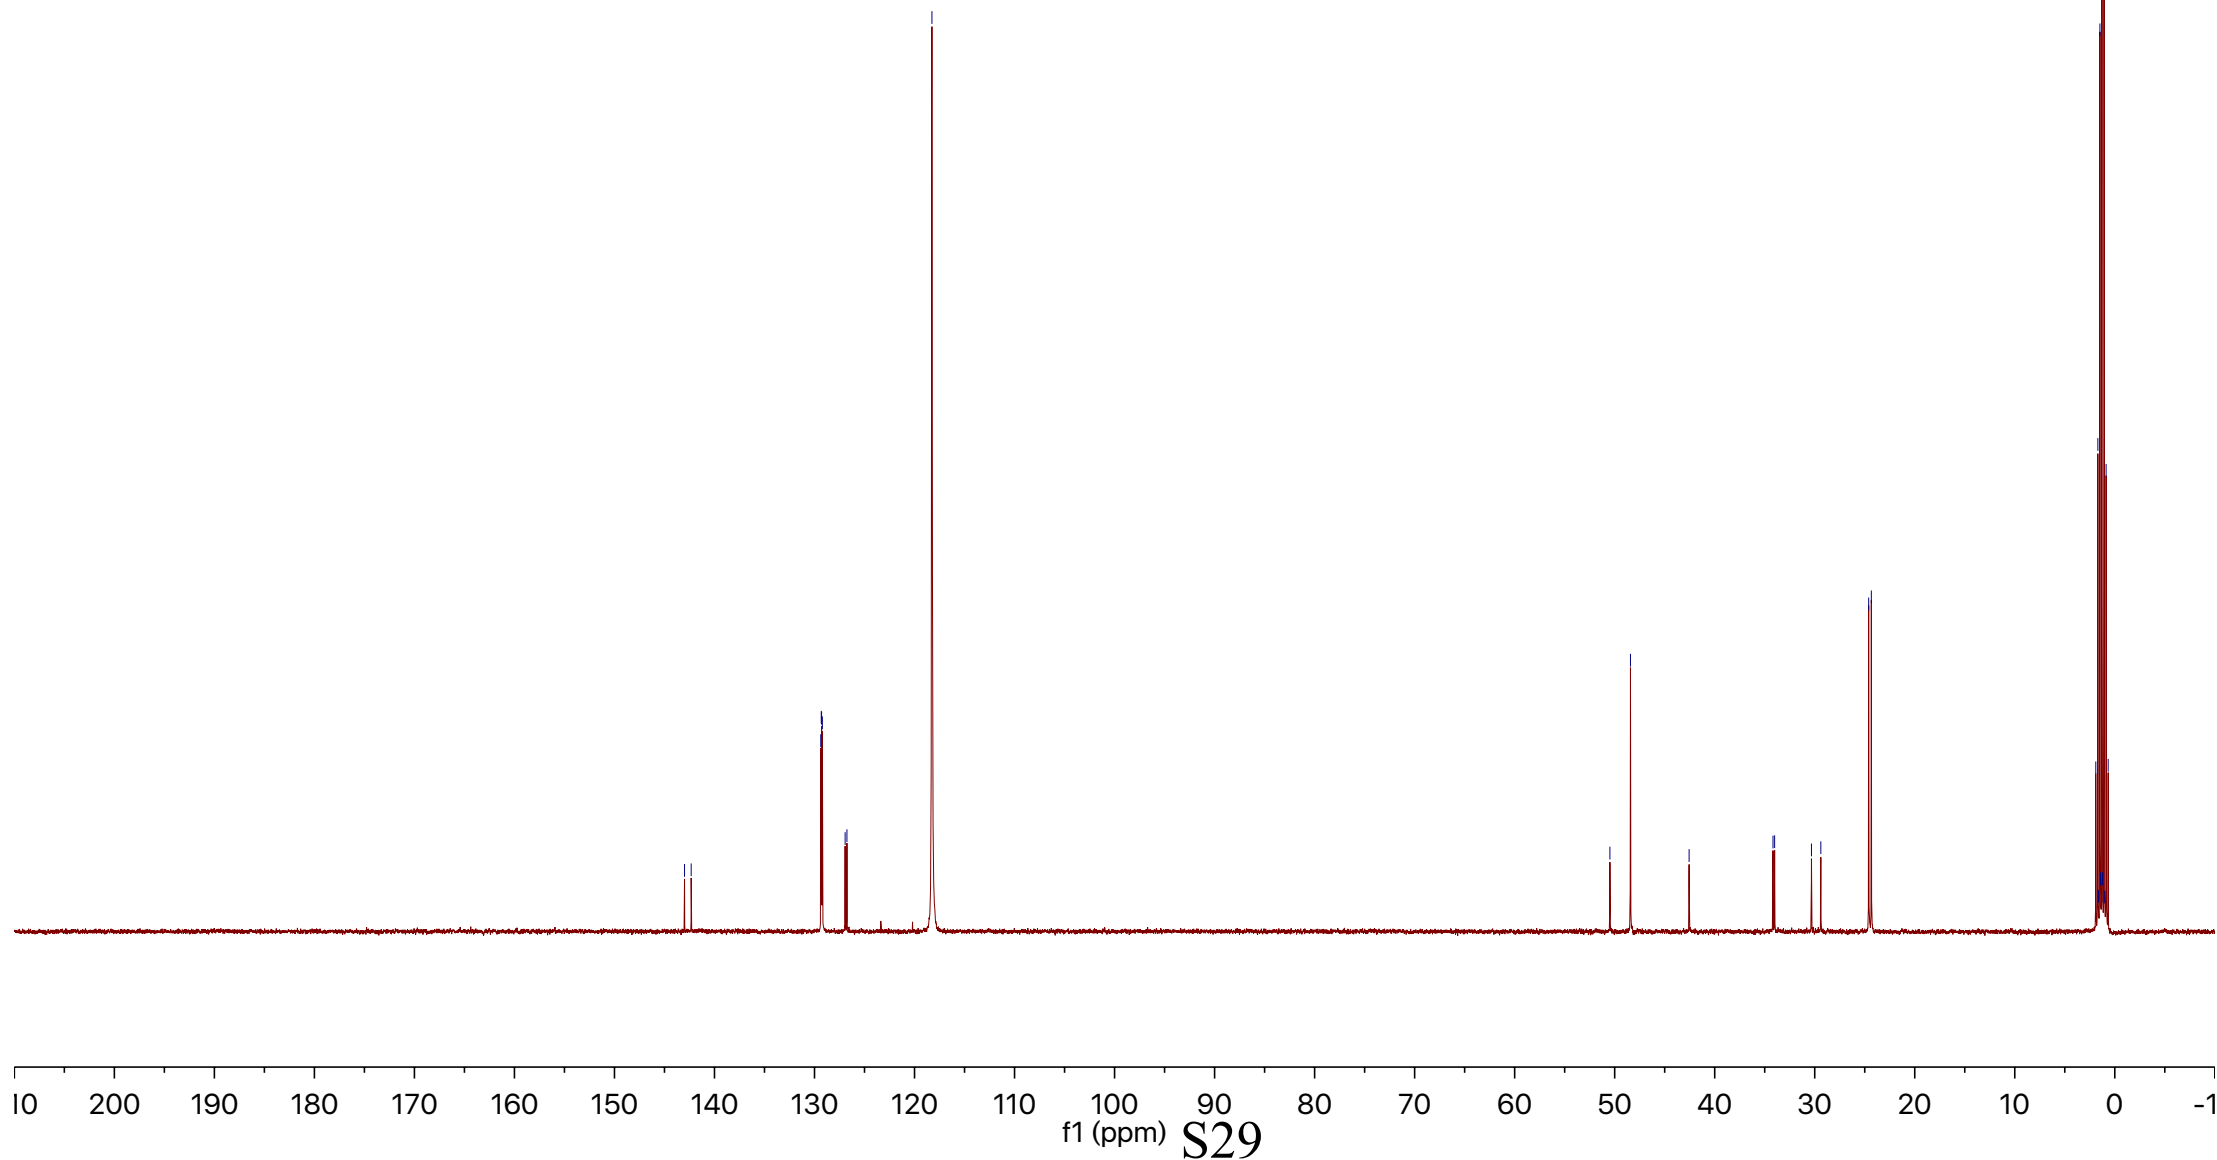

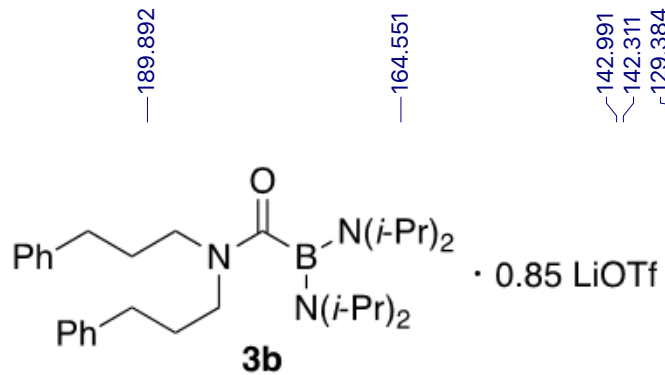

(high concentration sample, overnight run)

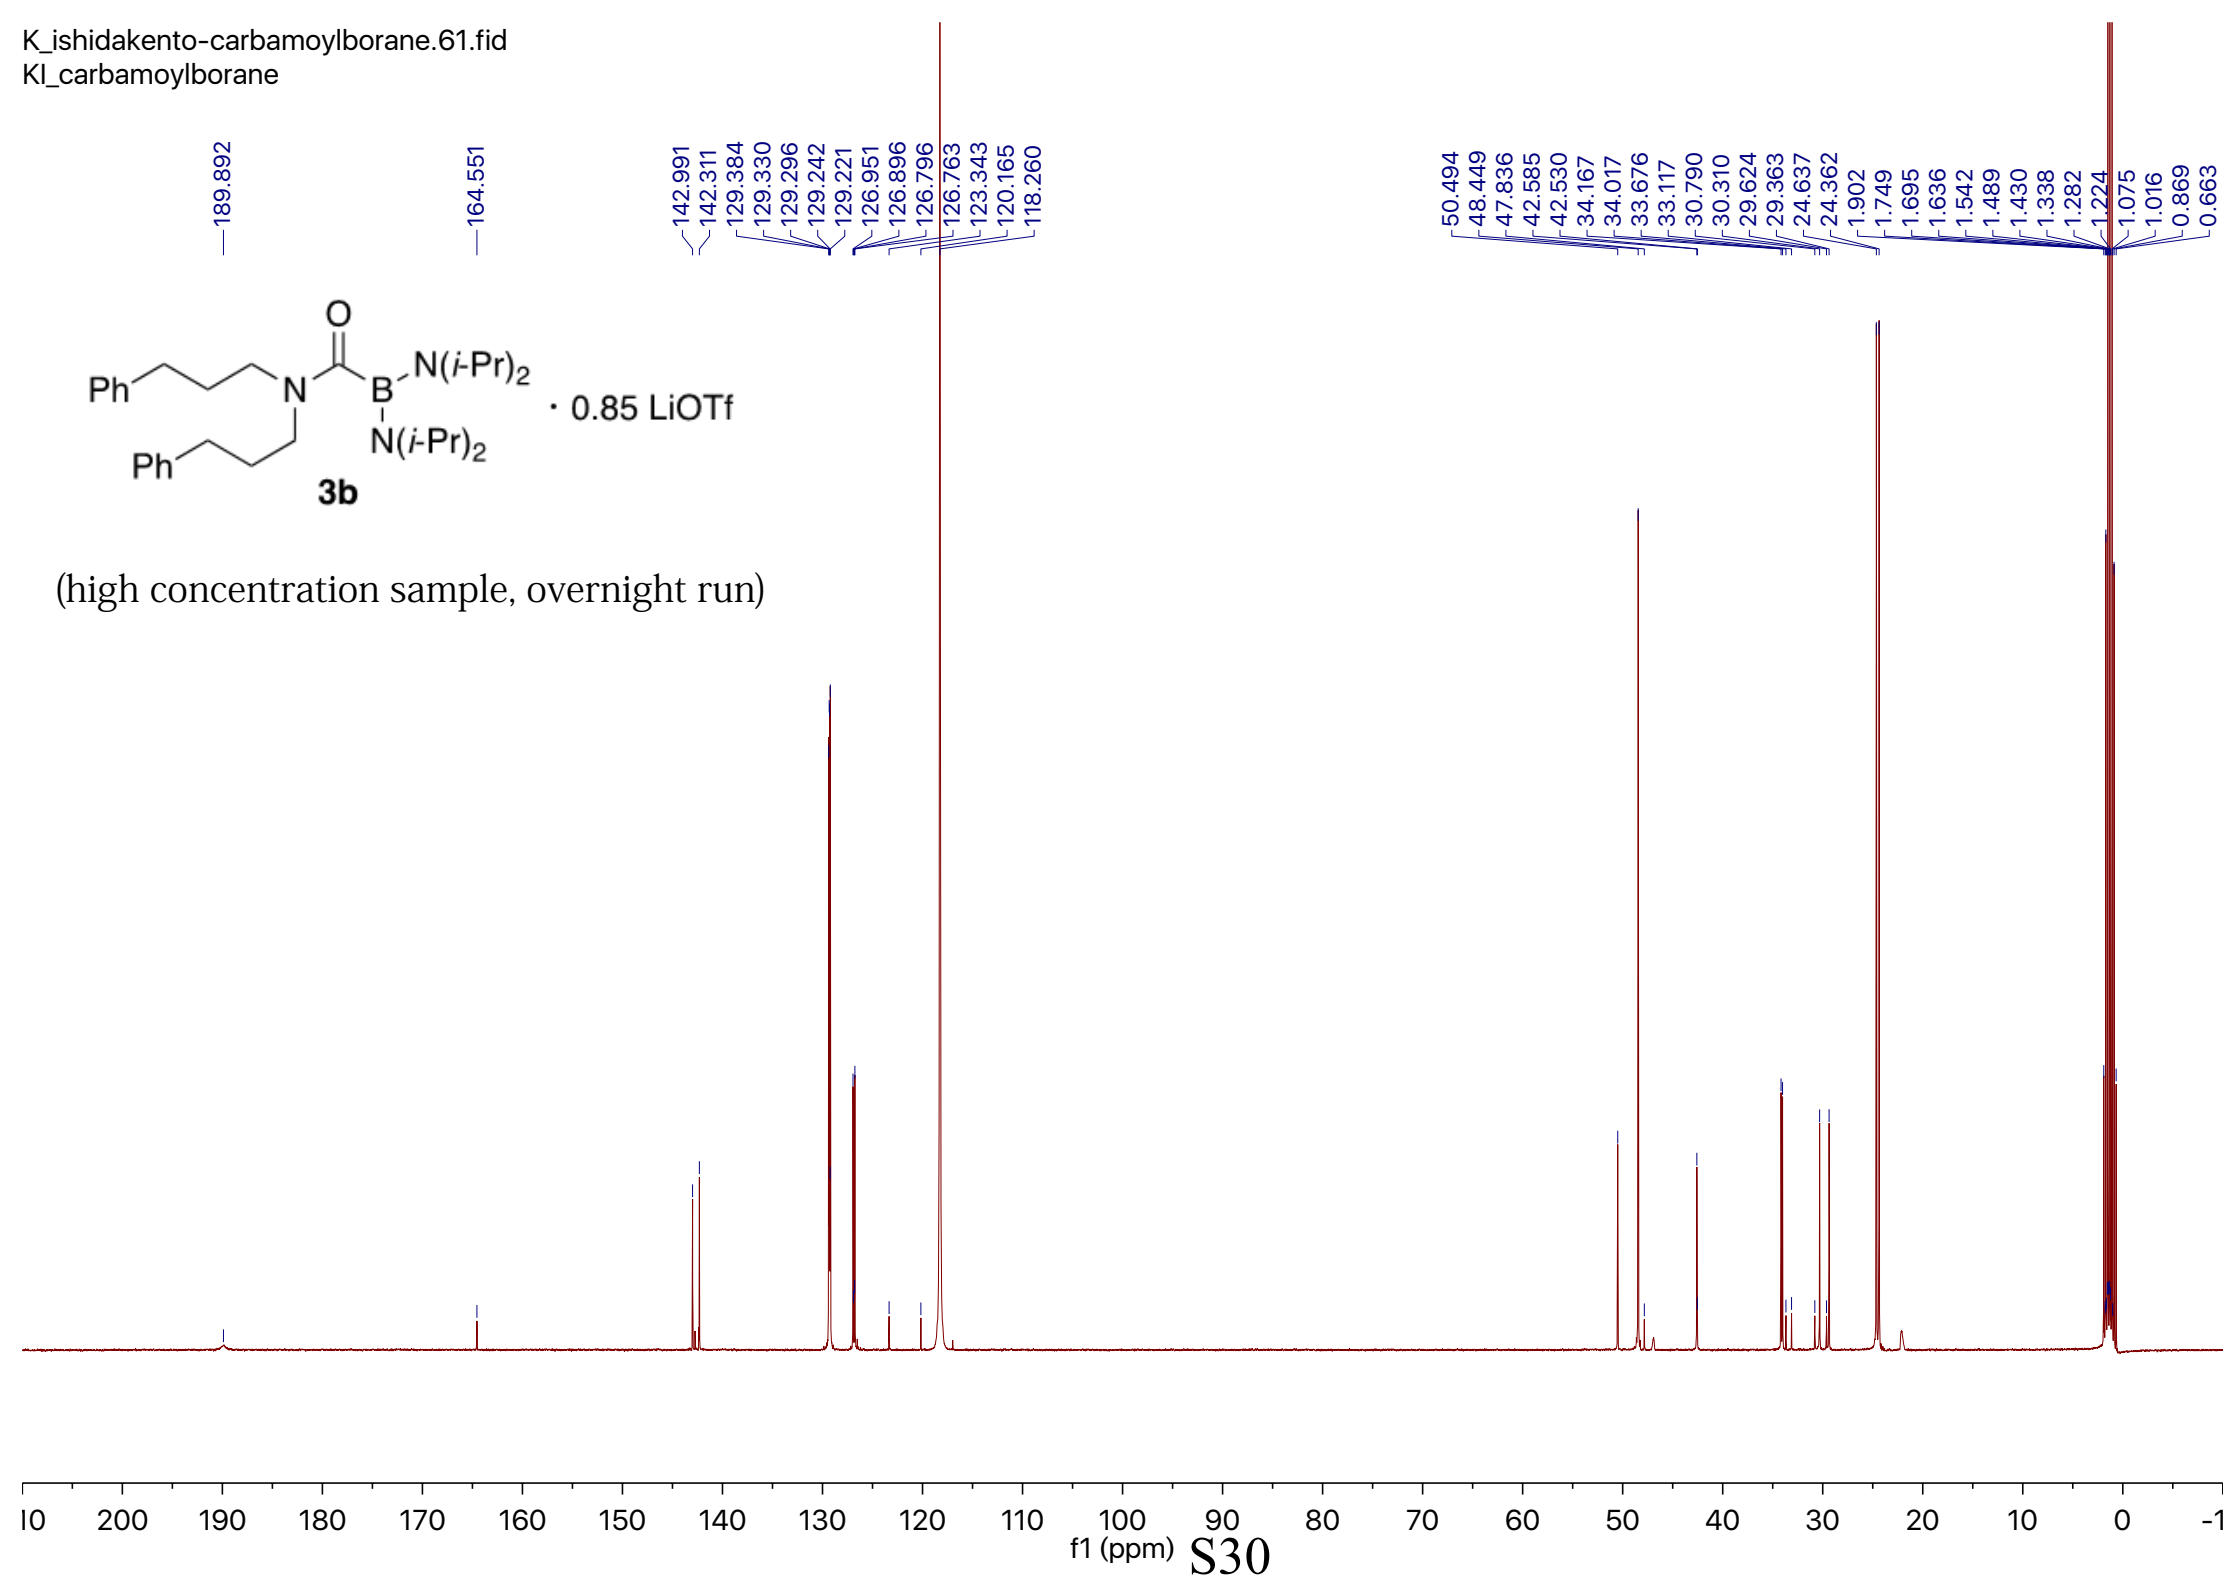

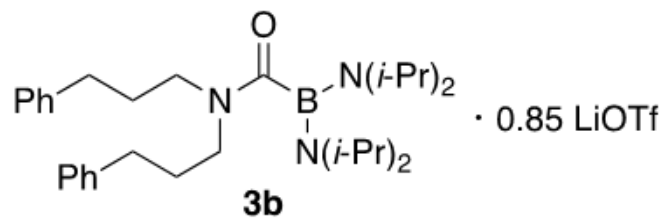

—30.71

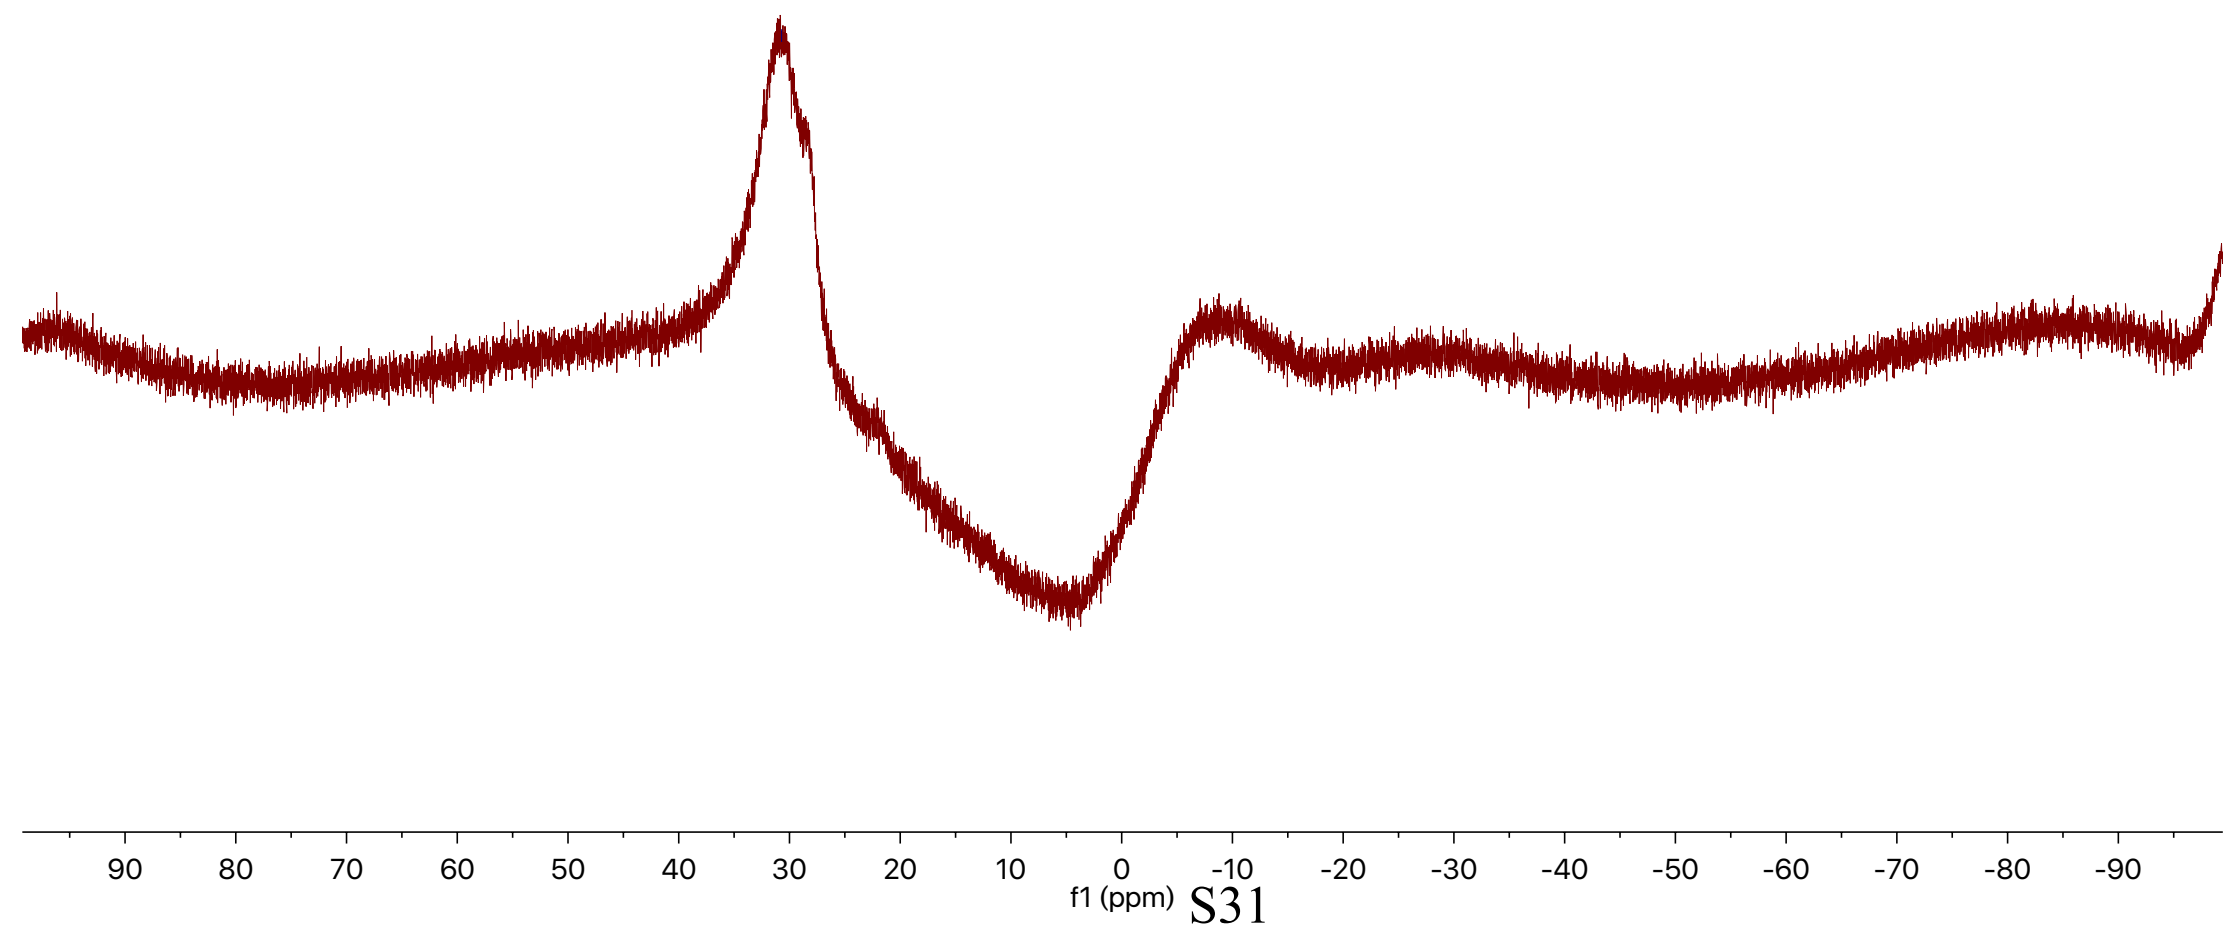

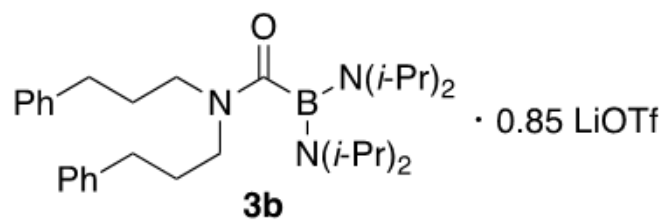

-79.73

10 0 -10 -20 -30 -40 -50 -60 -70 -80 -90 -100 -110 -120 -130 -140 -150 -160 -170 -180 -190 -200 -210

f1 (ppm) S32



LiOTf

-79.83

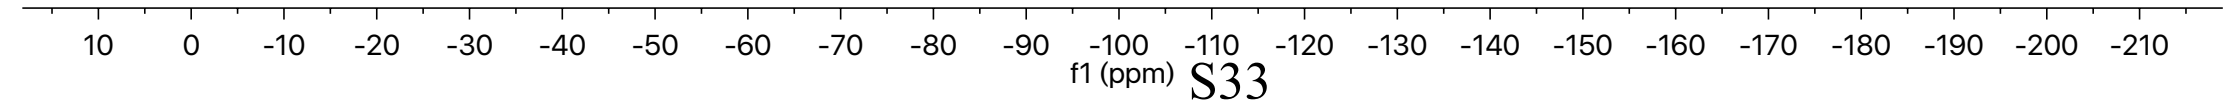

KI\_1506-1  
KI\_1506-1

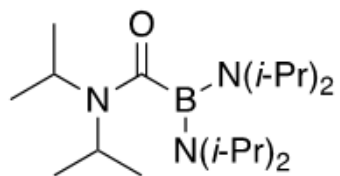

**3a**

• 0.93 LiOTf

— 7.260

3.871  
3.855  
3.838  
3.824  
3.822  
3.805  
3.545  
3.527  
3.523  
3.510  
3.504  
3.493  
3.484  
3.475  
3.467  
3.288  
3.271  
3.253  
1.448  
1.443  
1.431  
1.426  
1.295  
1.278  
1.262  
1.245  
1.229  
1.223  
1.212  
1.206  
1.200  
1.196  
1.184  
1.179  
1.163

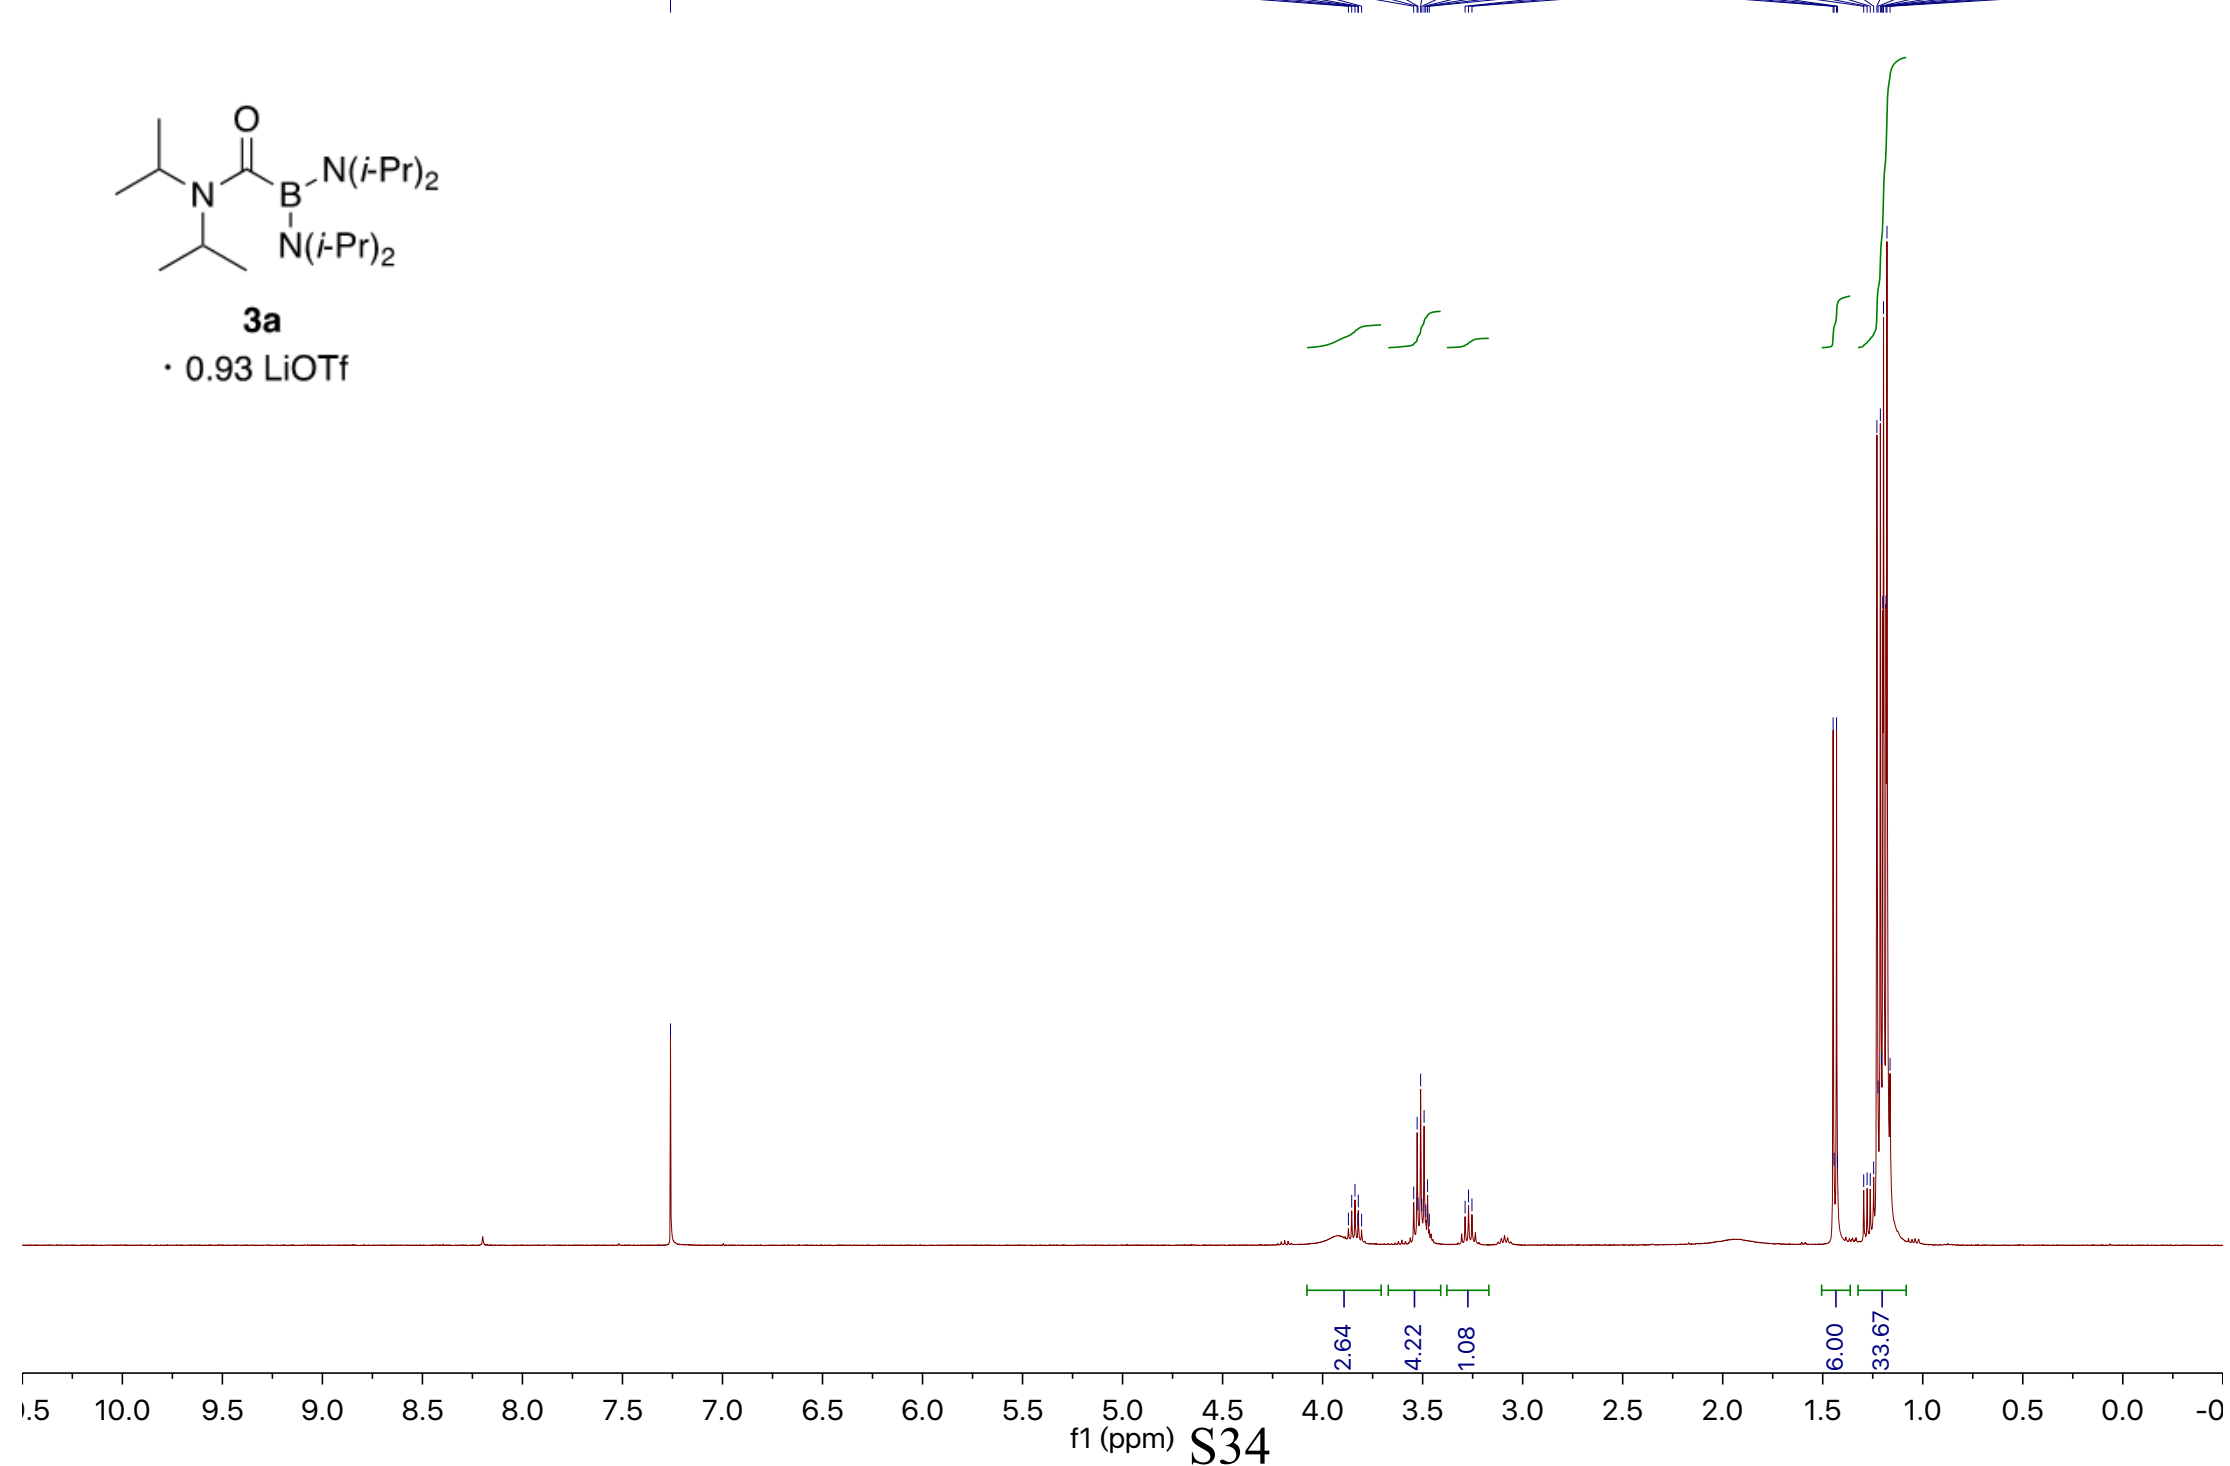

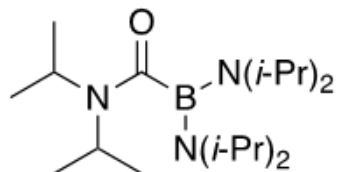

**3a**

· 0.93 LiOTf

77.317  
77.000  
76.682

49.406  
47.962  
44.700

24.815  
24.398  
20.902  
20.082

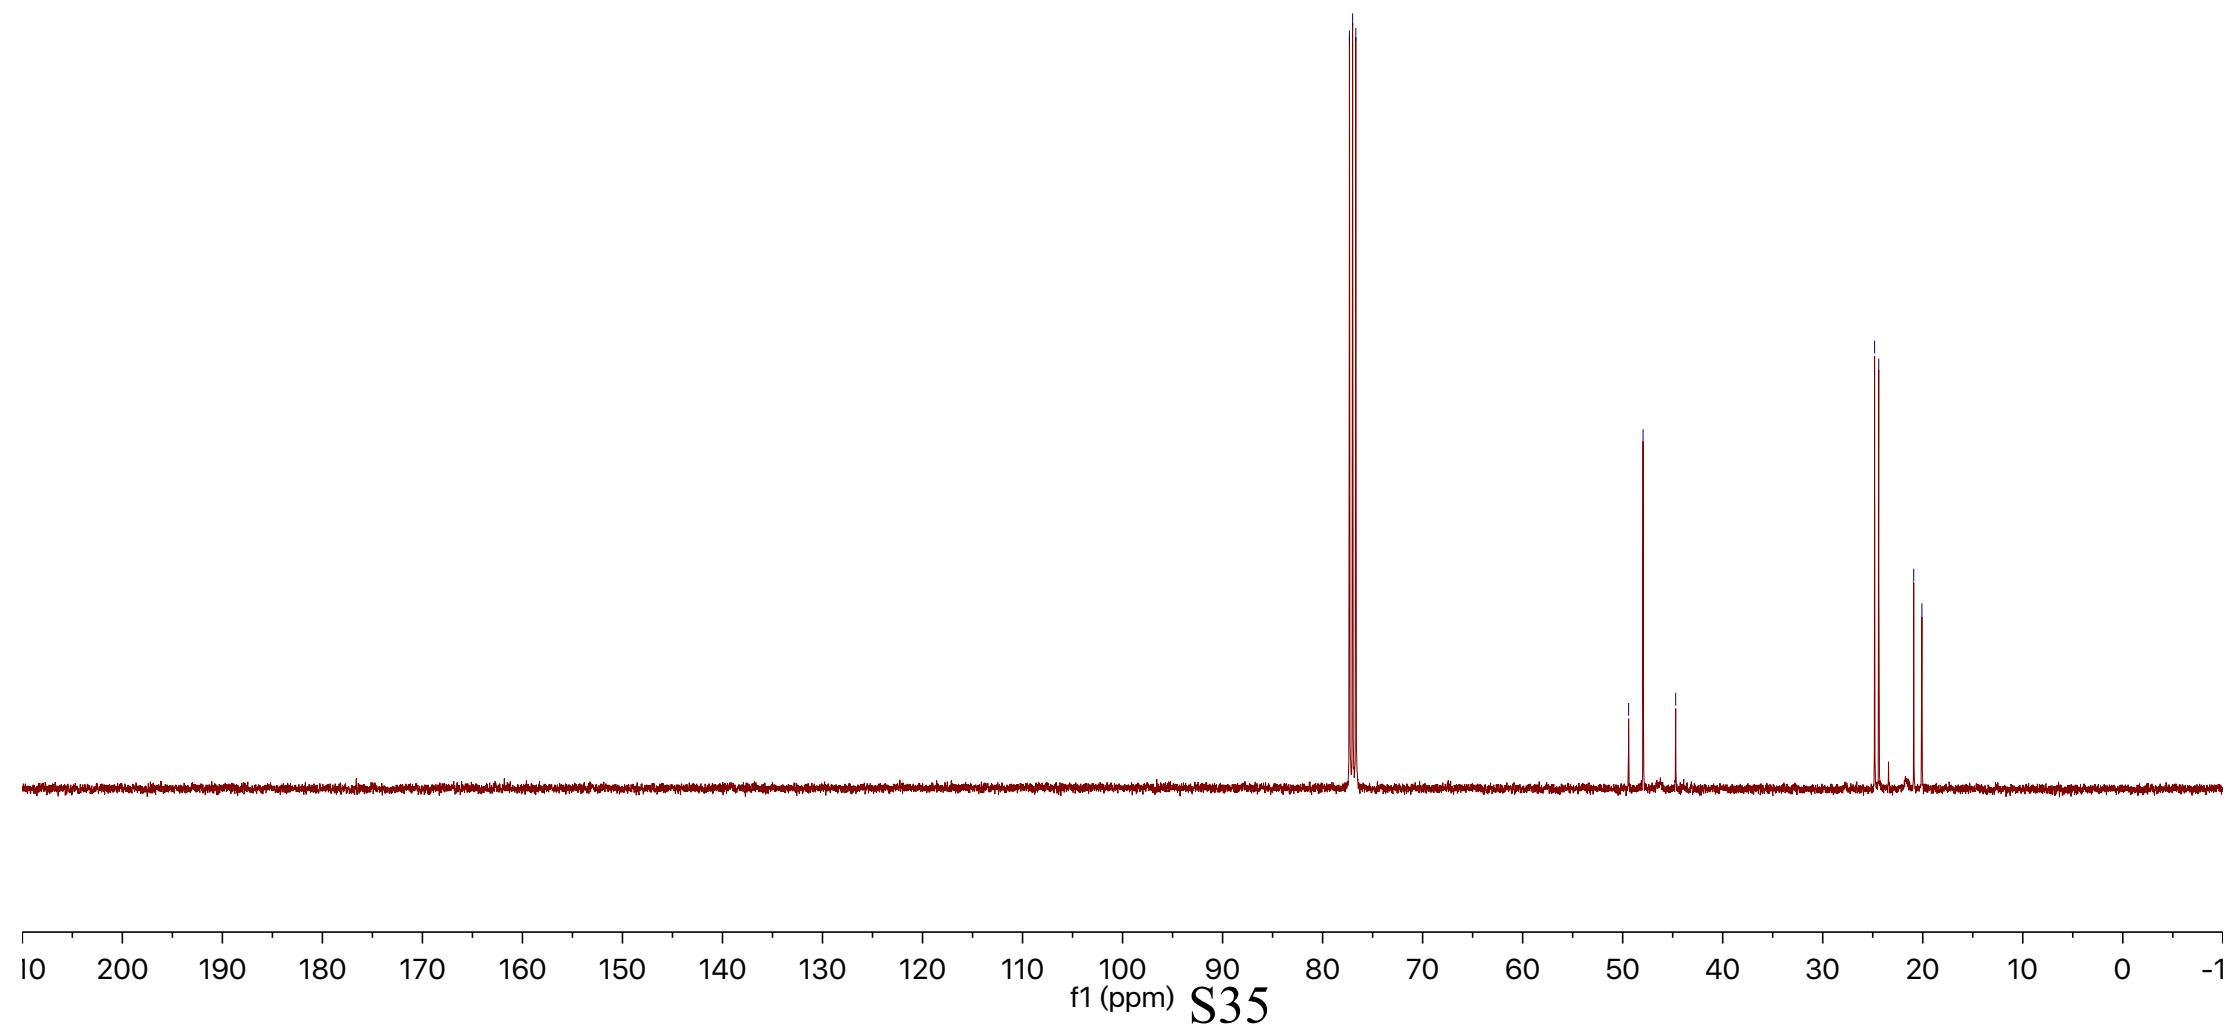

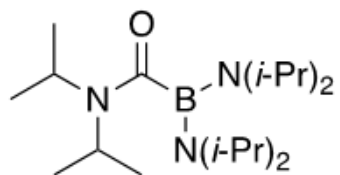

**3a**  
· 0.93 LiOTf

(high concentration sample, overnight run)

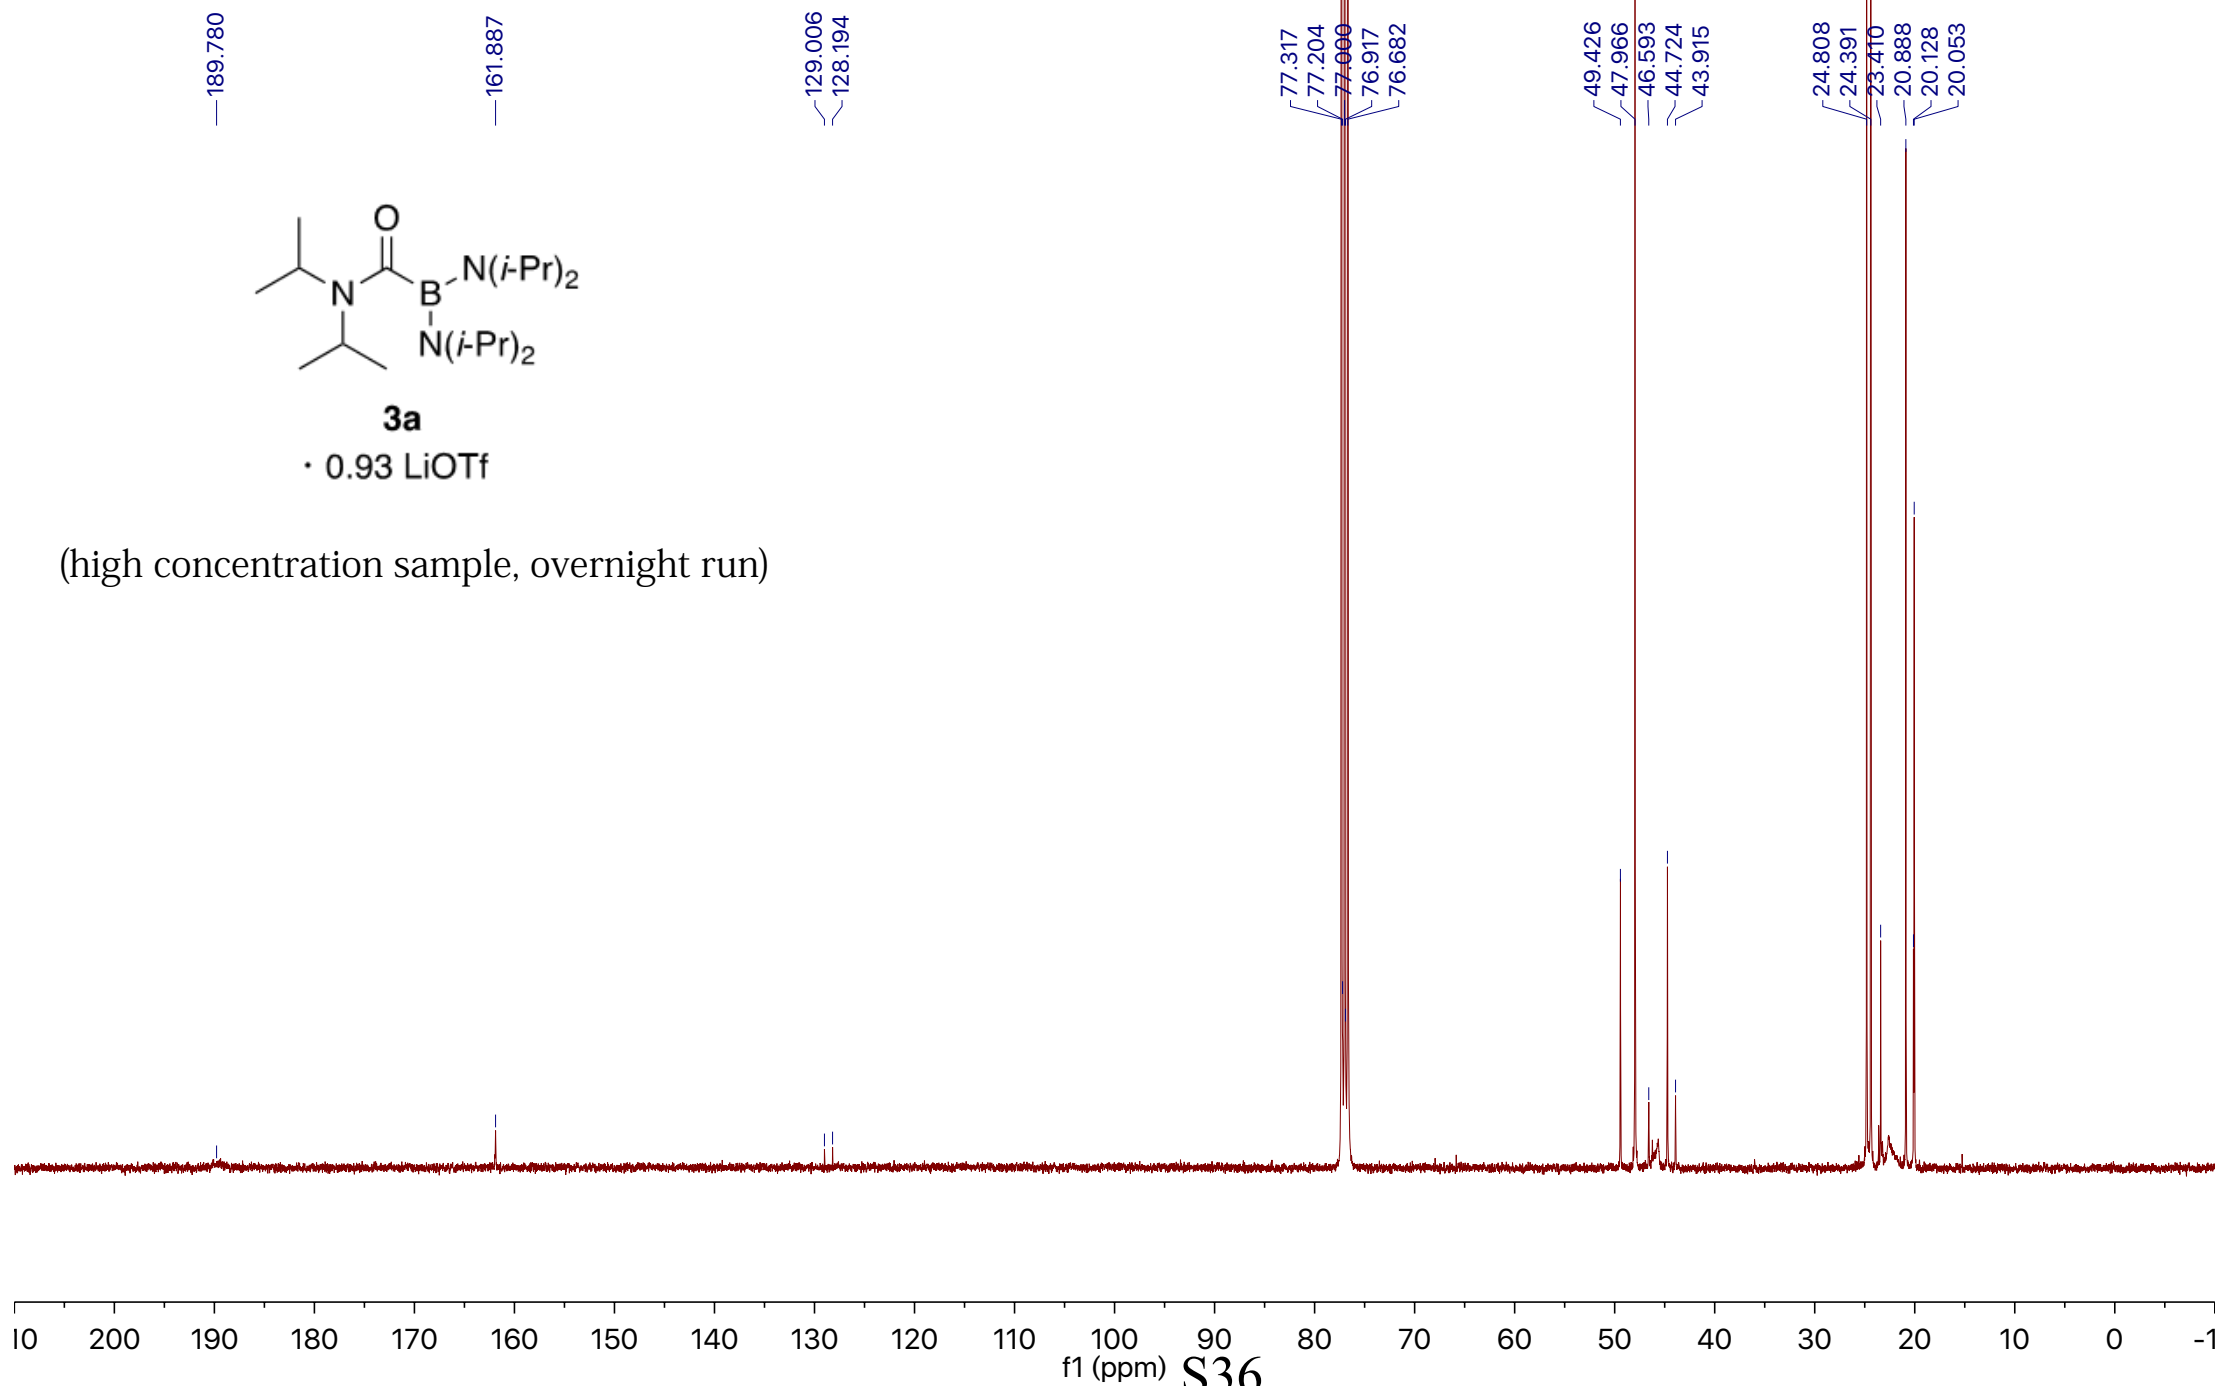

—29.05

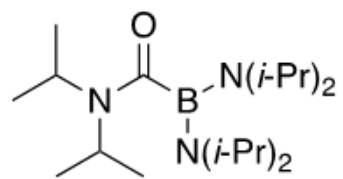

**3a**

· 0.93 LiOTf

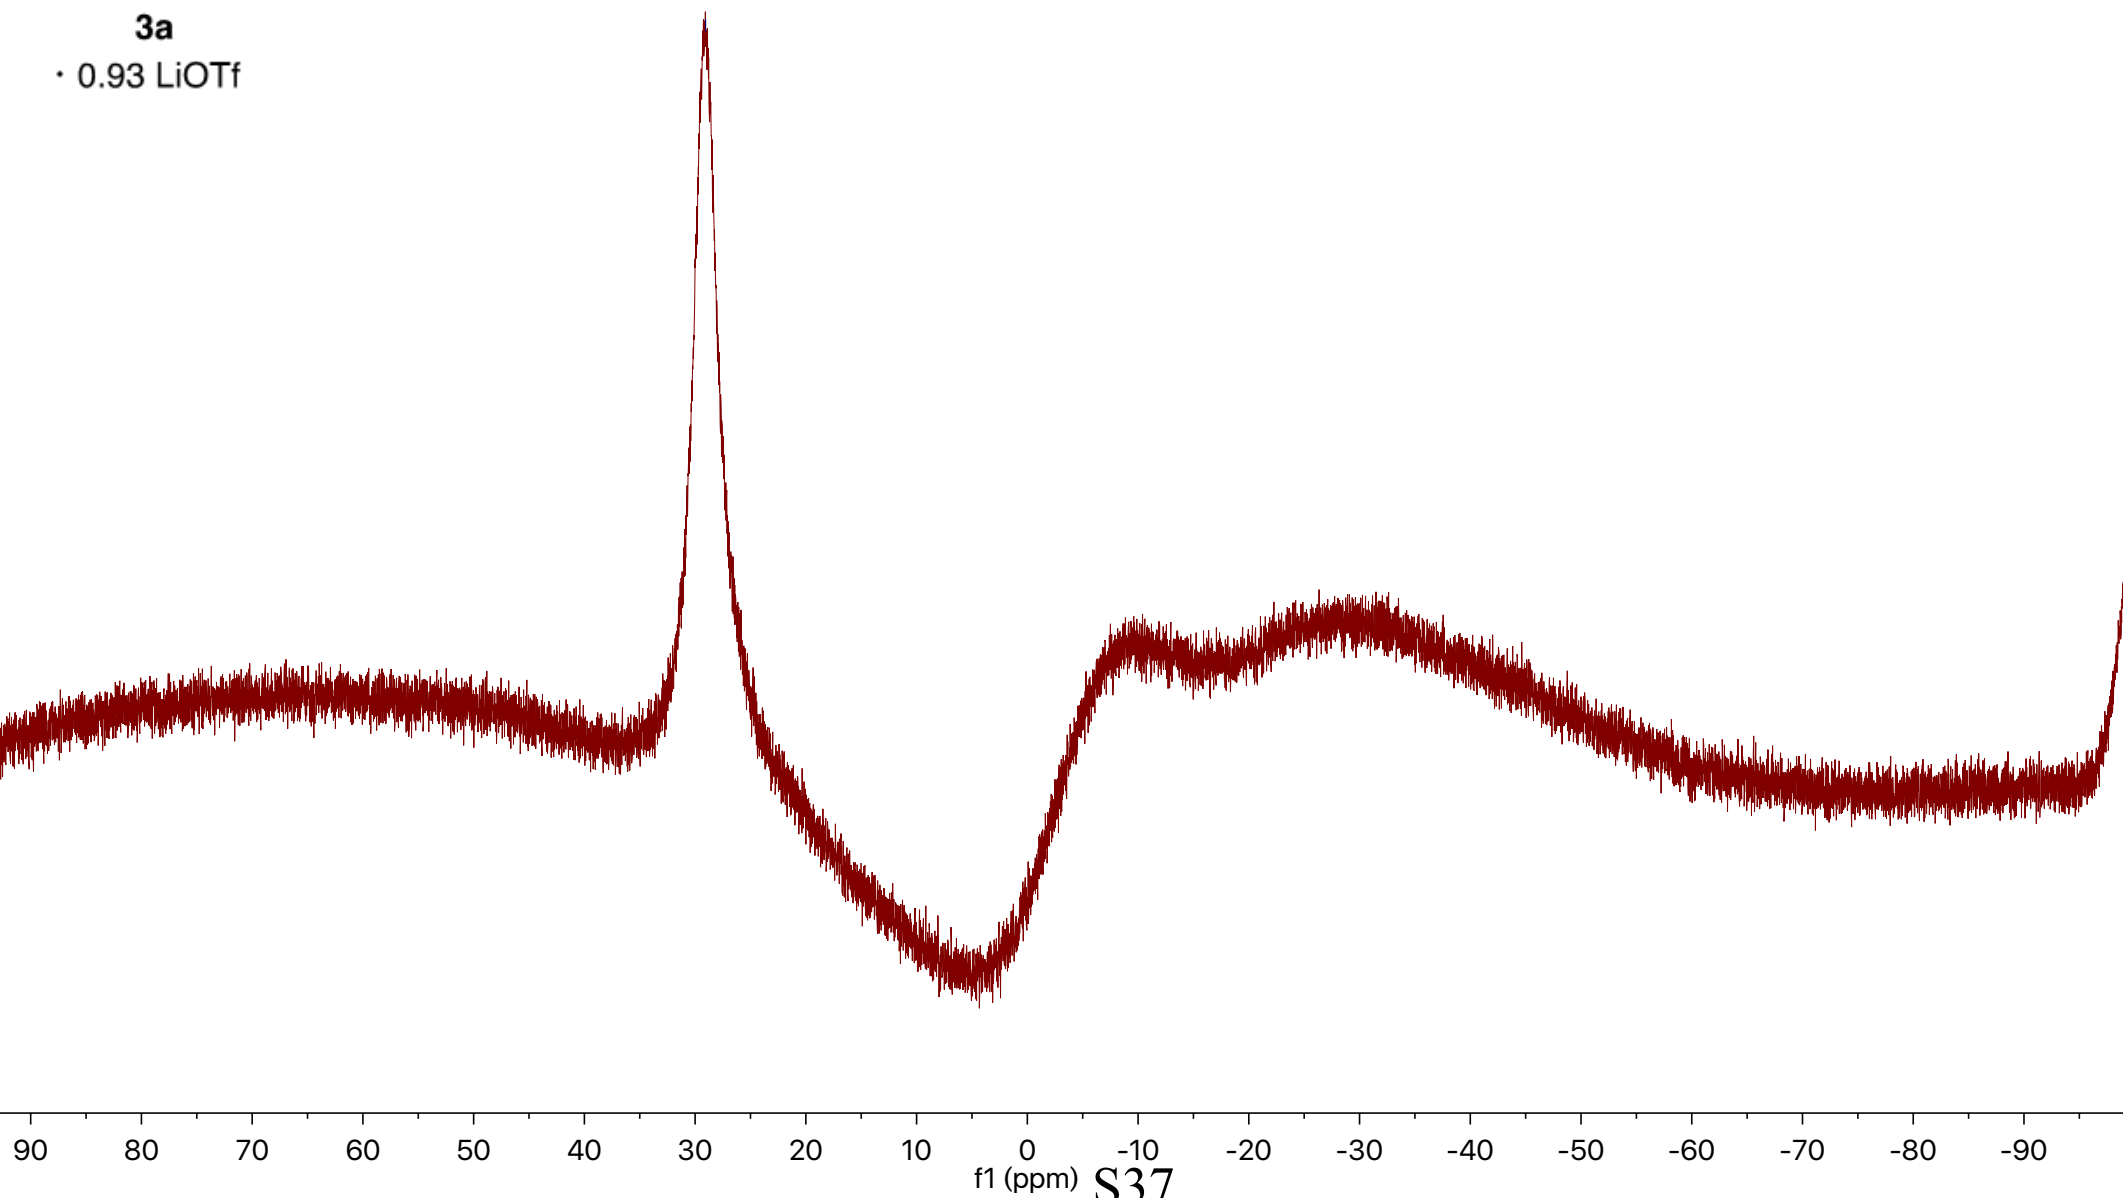

KI\_1852-4  
single\_pulse

7.974  
7.307  
7.300  
7.294  
7.288  
7.280  
7.273  
7.269  
7.262  
7.255  
7.241  
7.236  
7.217  
7.211  
7.199  
7.188  
7.180  
7.176  
7.166  
7.160  
3.469  
3.462  
3.452  
3.445  
3.435  
3.428  
3.417  
3.410  
3.400  
3.393  
3.281  
3.273  
3.260  
3.248  
3.239  
3.231  
3.220  
2.619  
2.612  
2.600  
2.593  
2.581  
2.573  
2.337  
2.329  
1.972  
1.965  
1.960  
1.953  
1.947  
1.940  
1.934  
1.927  
1.917  
1.905  
1.898  
1.887  
1.878  
1.868  
1.858  
1.845  
1.838  
1.801  
1.794  
1.788  
1.781  
1.773  
1.762  
1.754  
1.747  
1.741  
1.734  
1.715  
1.158  
1.151  
1.141  
1.134  
1.098  
1.081  
1.073

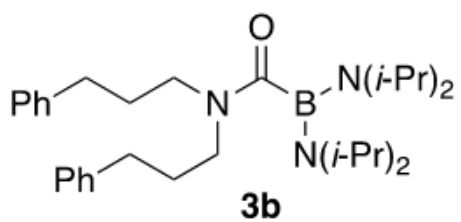

(LiOTf free)

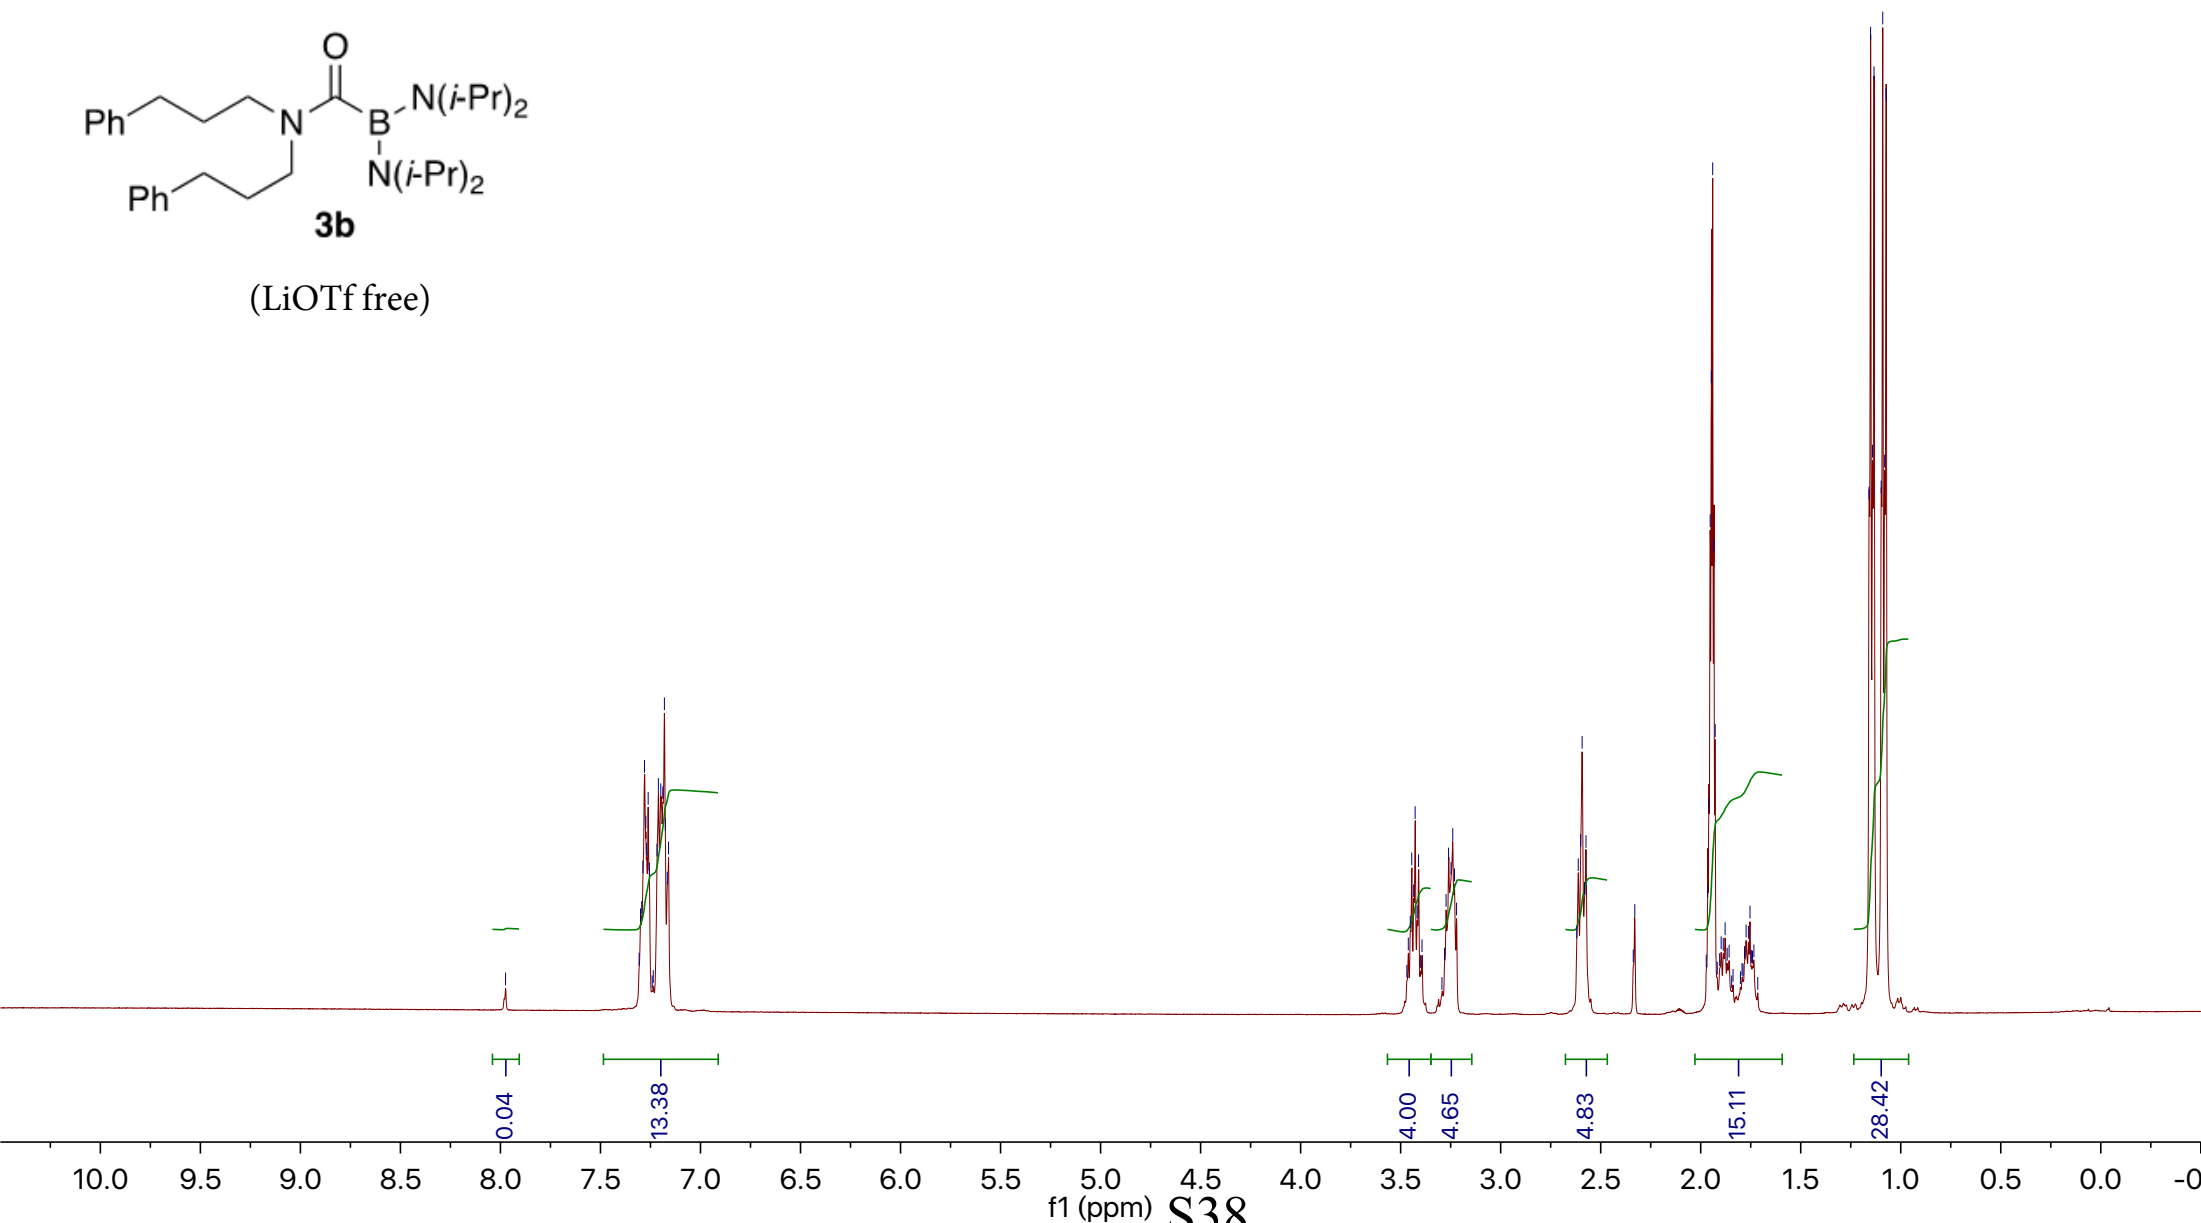

KI\_1852-4  
single pulse decoupled gated NOE

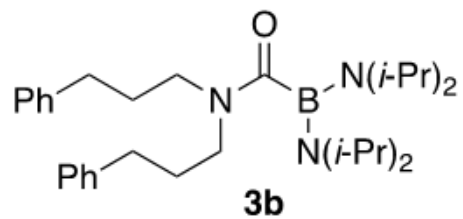

(LiOTf free)

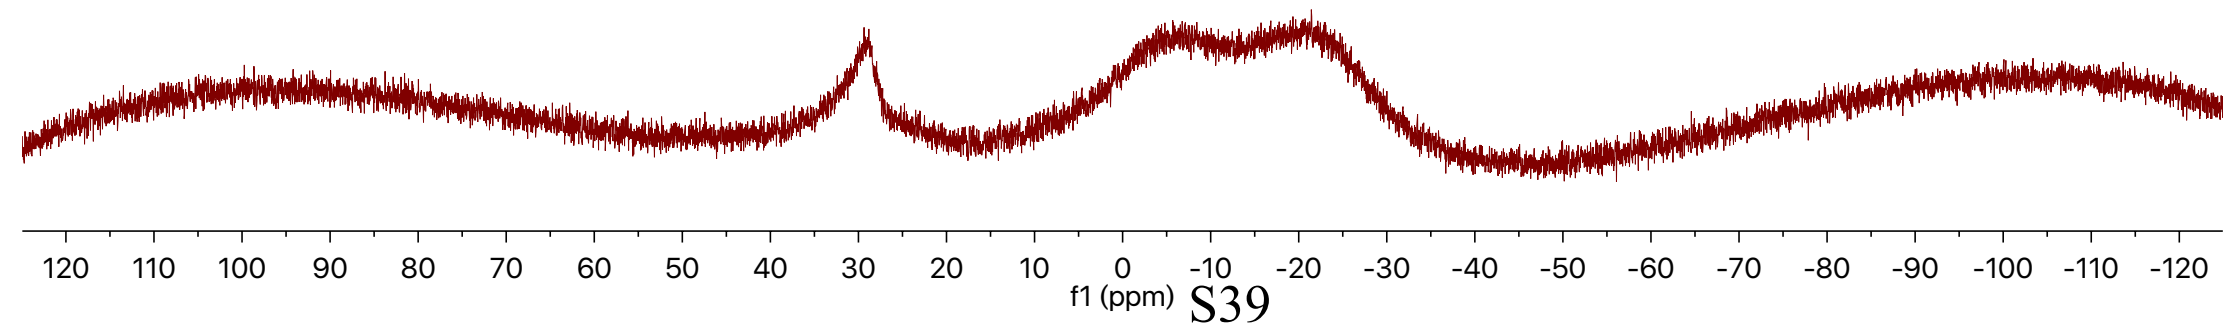

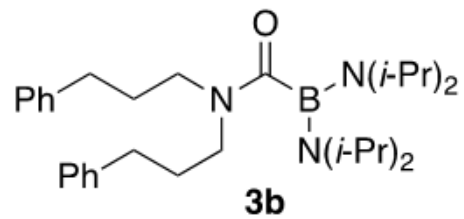

(LiOTf free)

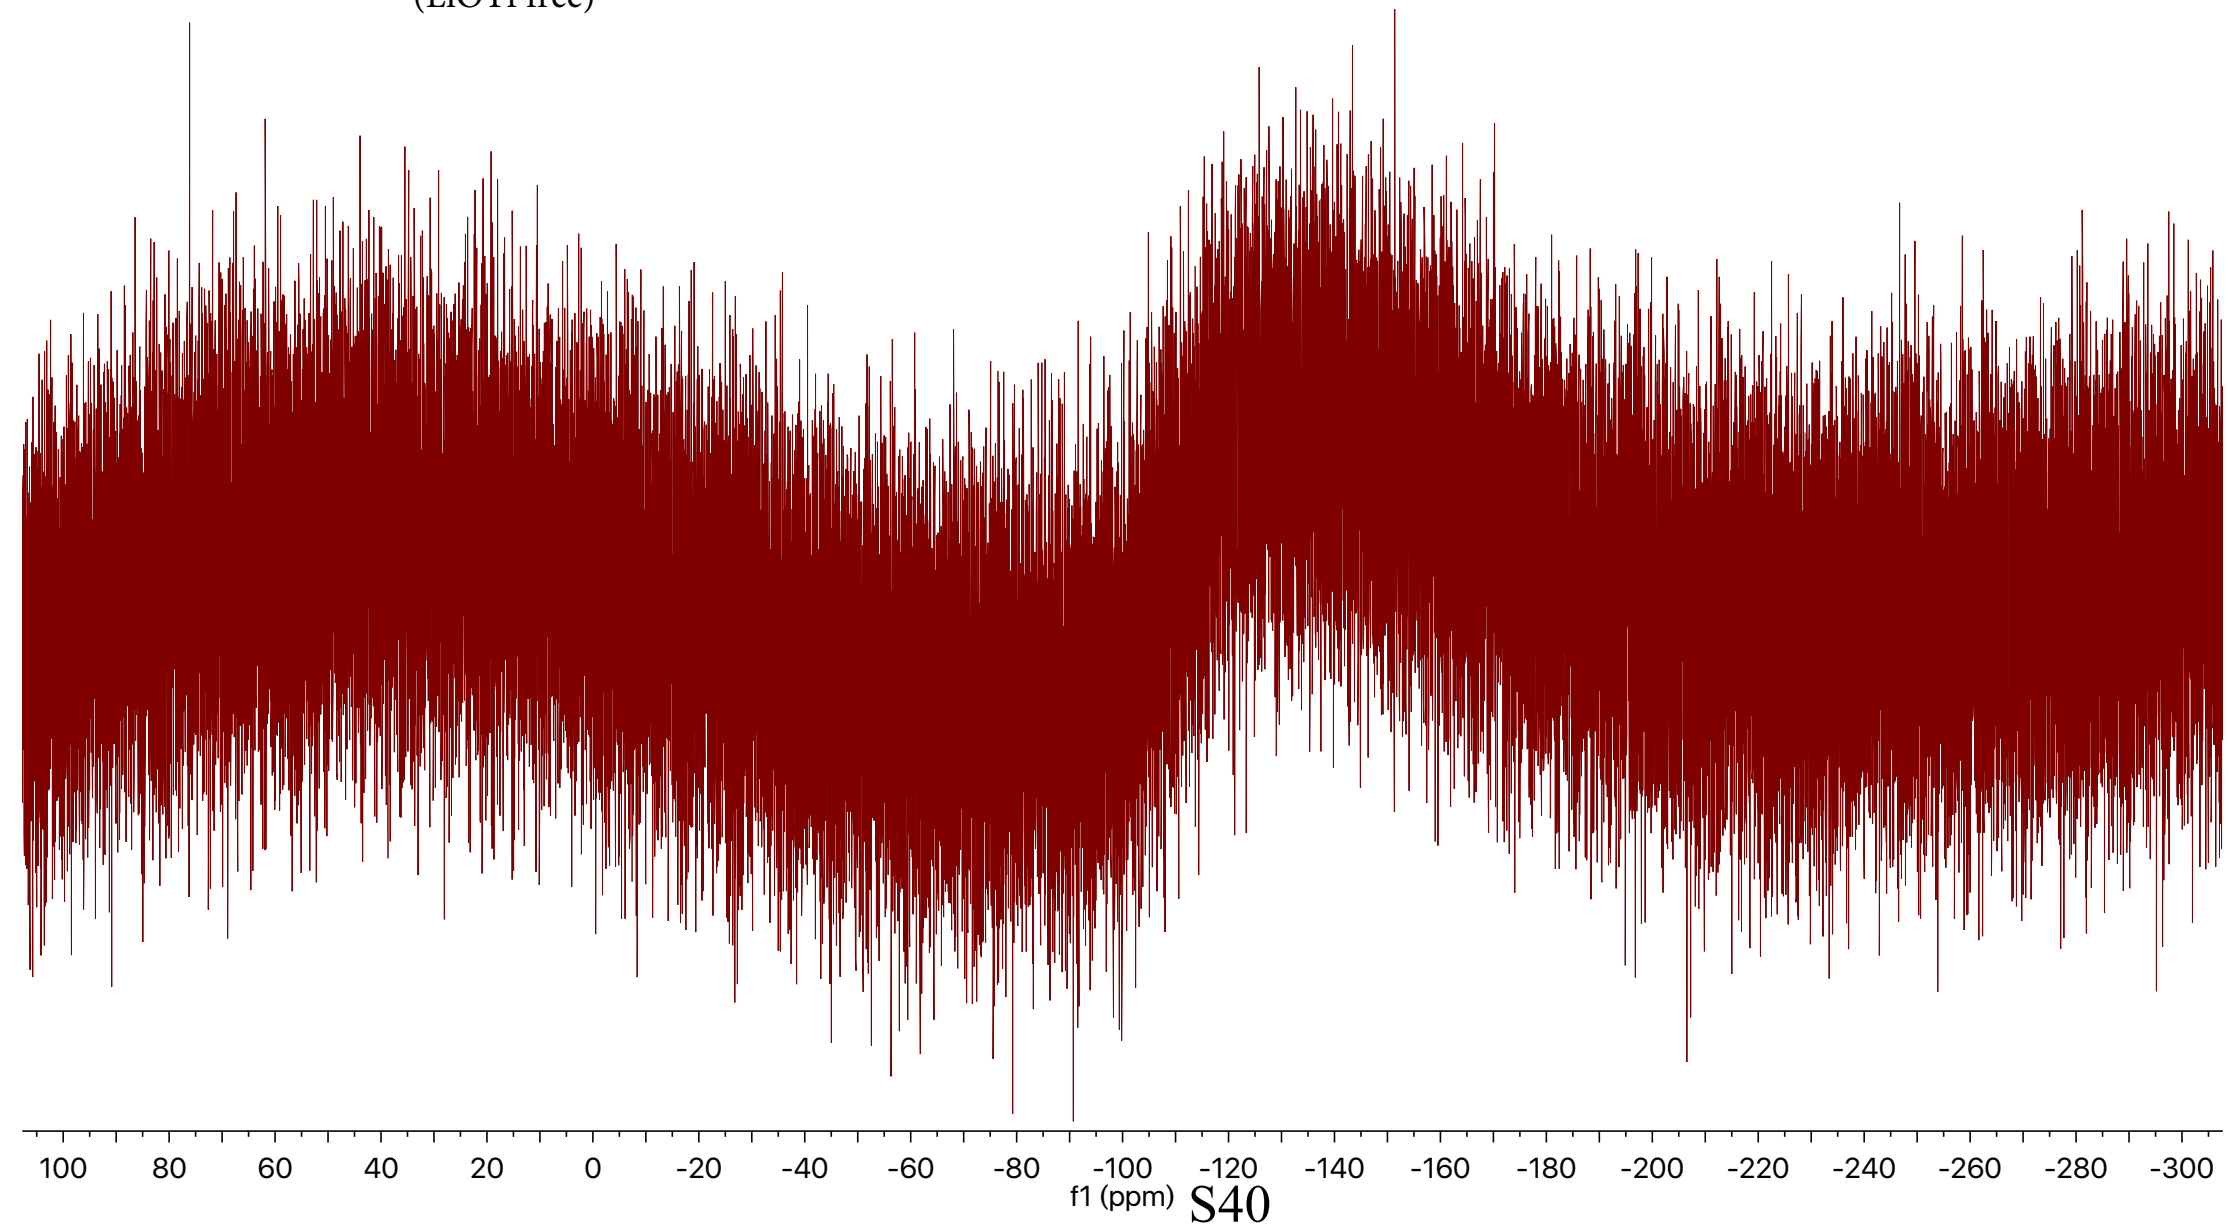



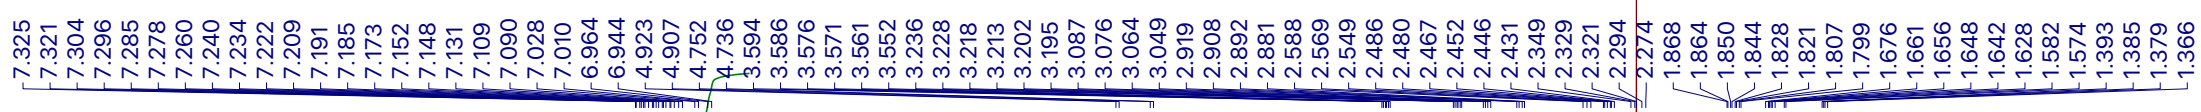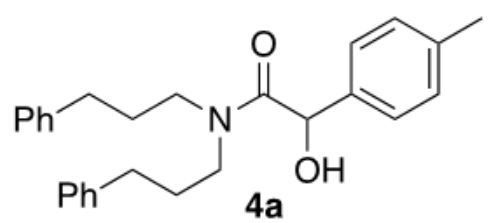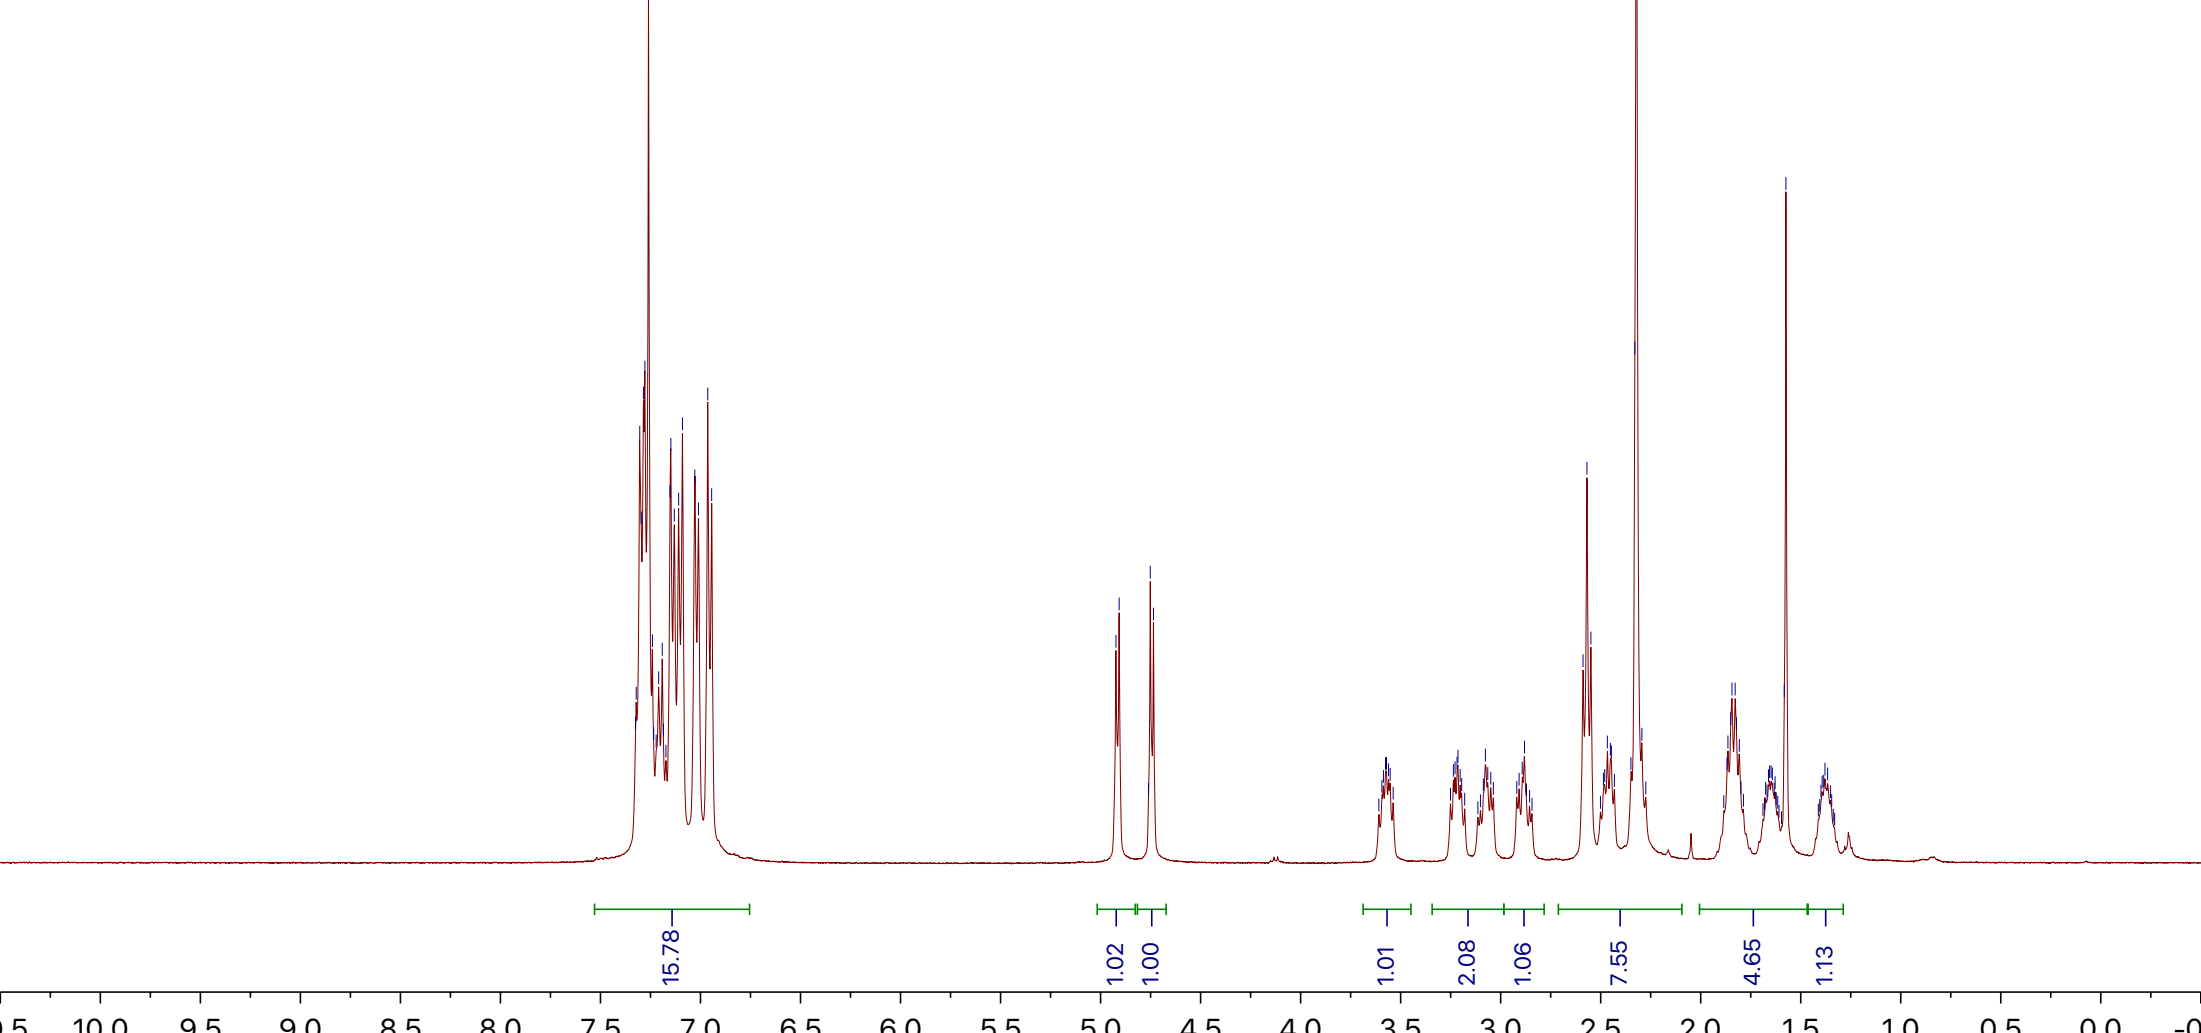

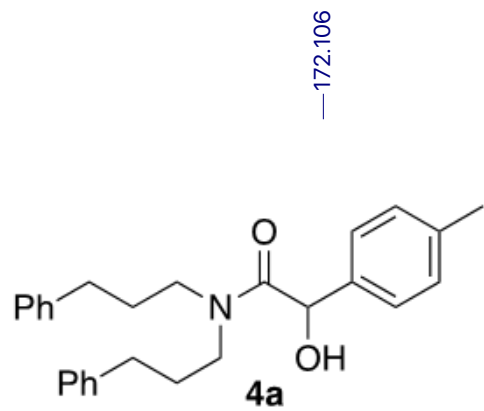

172.106  
141.266  
140.475  
138.211  
136.609  
129.639  
128.579  
128.382  
128.230  
127.314  
126.248  
125.959  
77.317  
76.999  
76.682  
71.361  
46.138  
46.062  
33.148  
32.768  
29.462  
28.897  
21.127

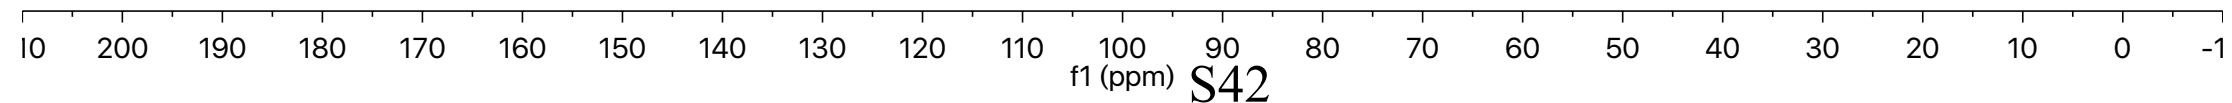

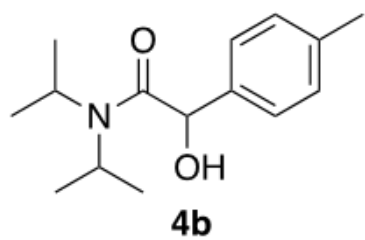

7.268  
7.260  
7.180  
7.159  
7.154  
7.133

5.083  
5.068  
5.062  
5.046

3.835  
3.818  
3.802  
3.785  
3.768  
3.379  
3.363  
3.346  
3.329  
3.312

2.376  
2.347  
2.326  
2.290

1.642  
1.479  
1.462  
1.405  
1.388  
1.250  
1.150  
1.133

0.495  
0.479

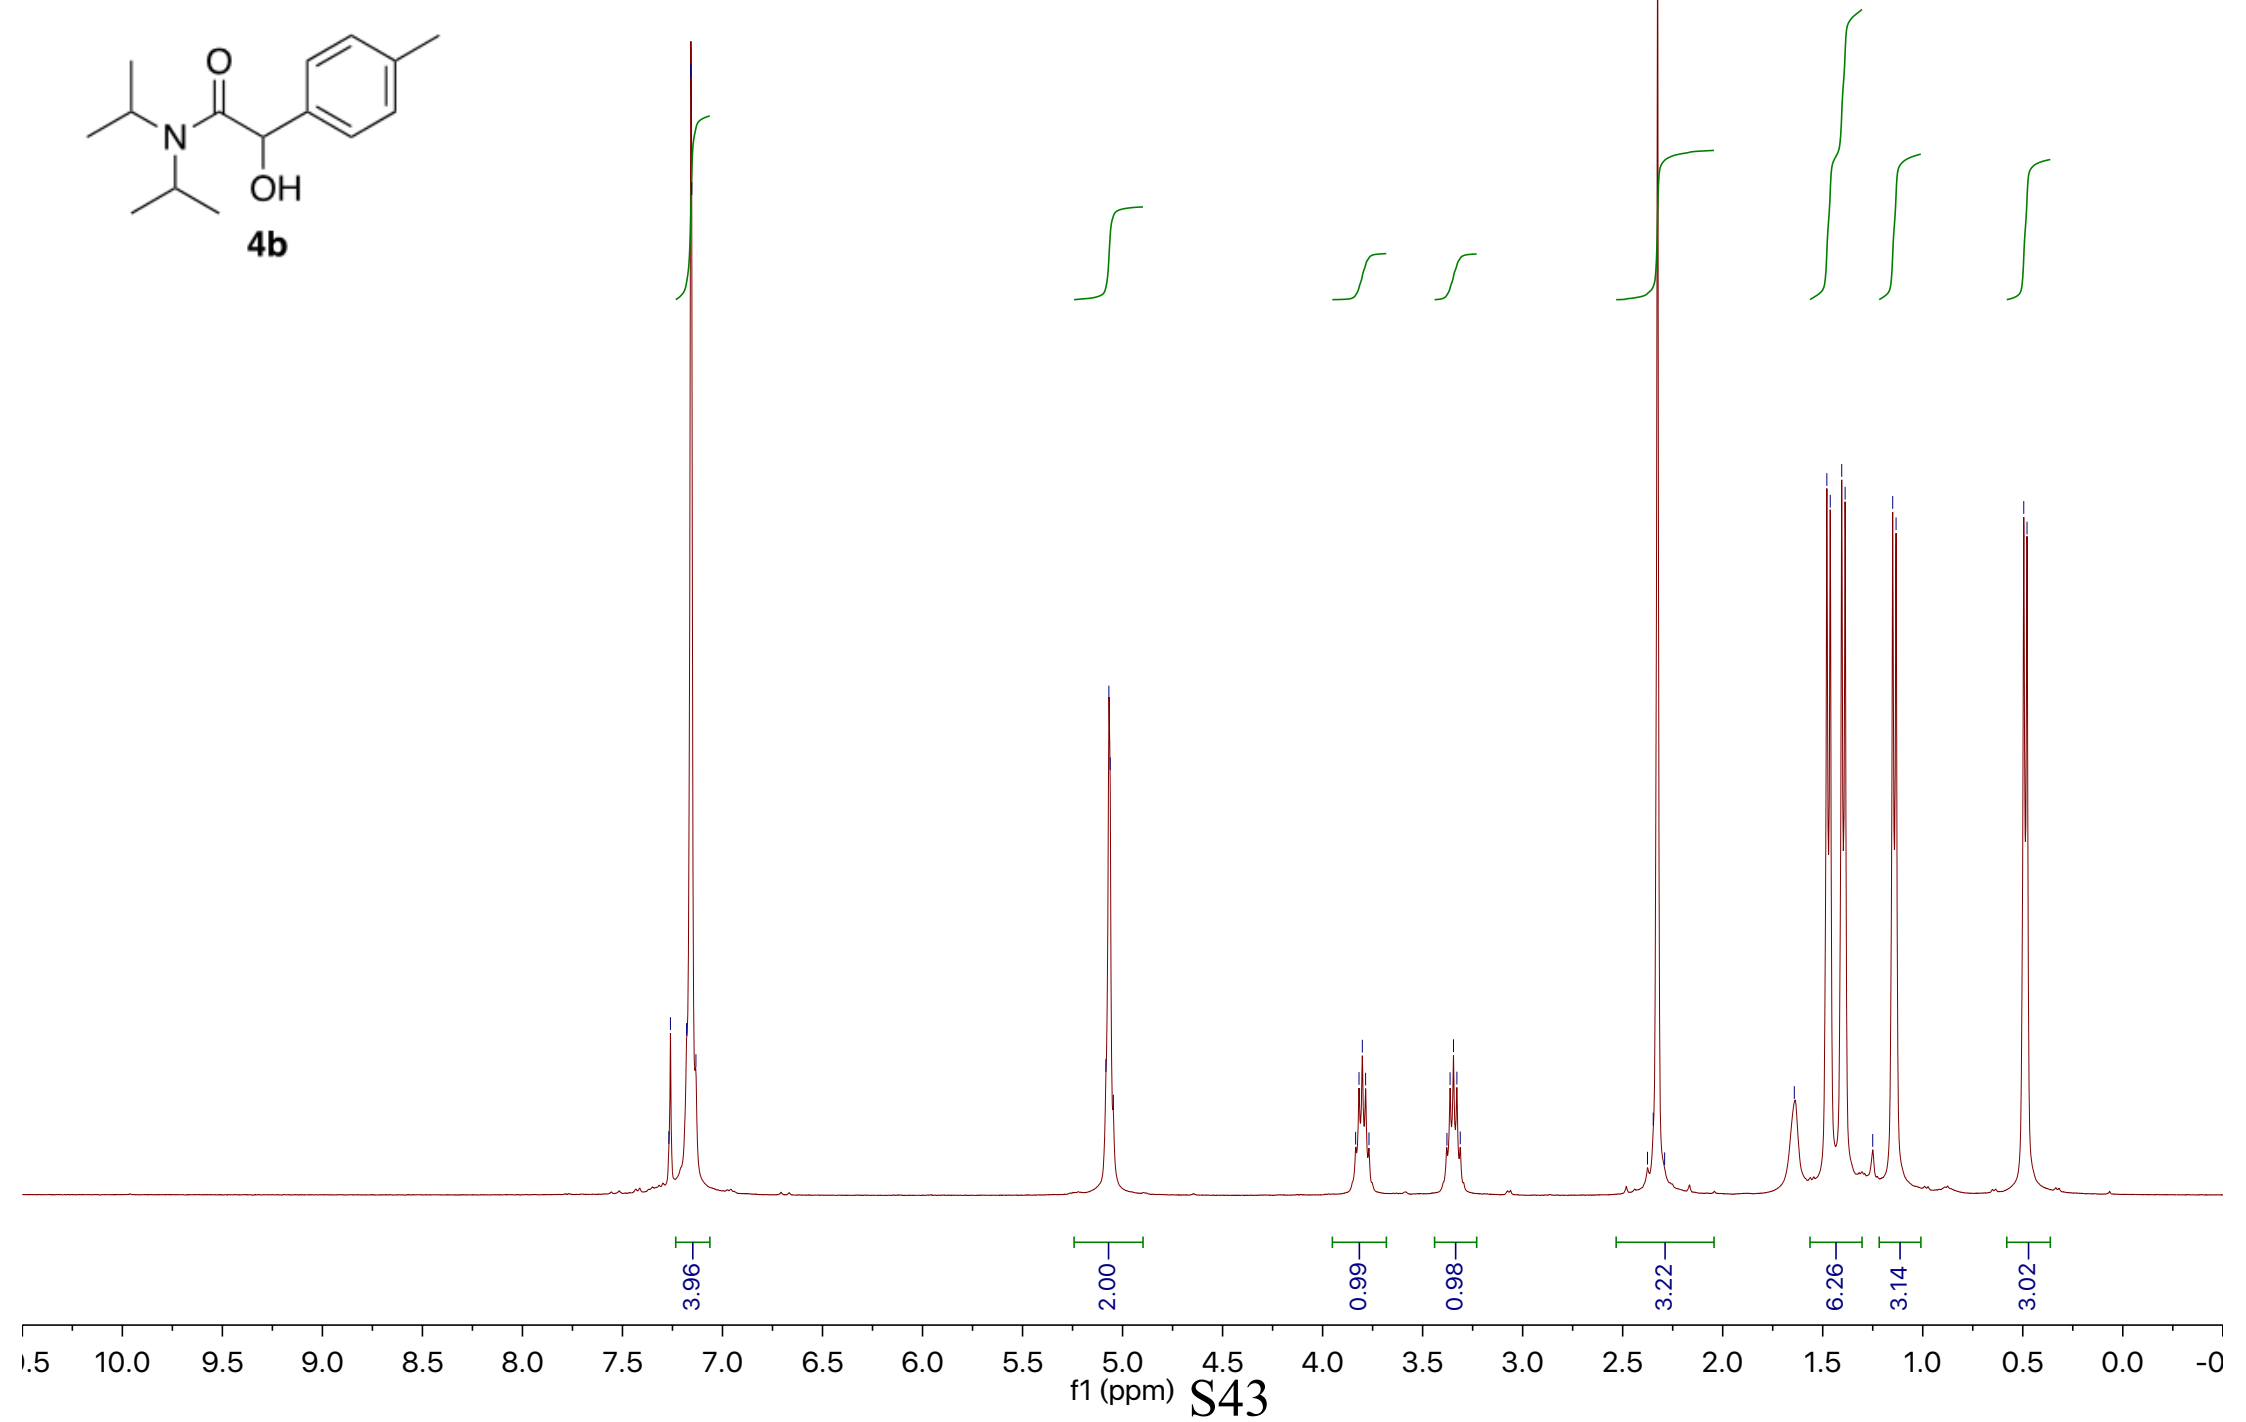

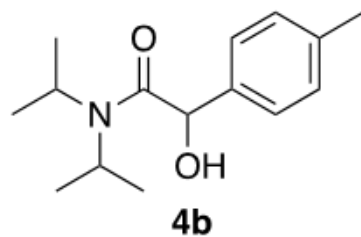

170.806

137.972  
137.216

129.578  
127.295

77.318  
77.001  
76.683  
71.554

47.909  
46.320

21.166  
20.518  
19.627  
18.717

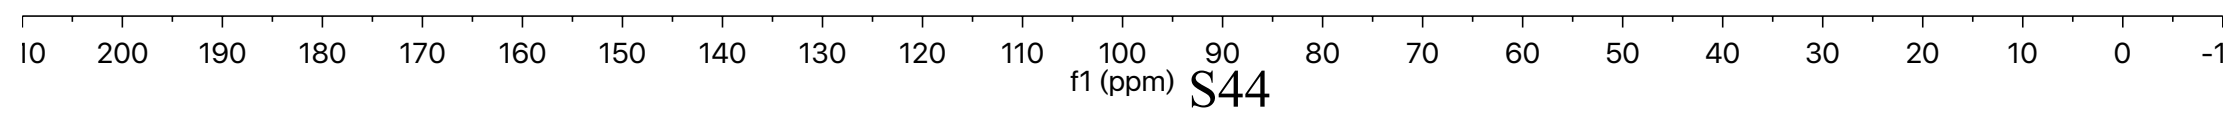

7.333  
7.329  
7.311  
7.303  
7.294  
7.287  
7.279  
7.268  
7.260  
7.250  
7.242  
7.232  
7.211  
7.193  
7.187  
7.175  
7.148  
7.130  
7.077  
7.067  
7.059  
7.051  
7.042  
7.023  
4.941  
4.925  
4.802  
4.793  
4.777  
4.777  
3.617  
3.610  
3.600  
3.595  
3.584  
3.576  
3.232  
3.224  
3.210  
3.198  
3.191  
3.089  
3.079  
3.067  
3.052  
3.039  
2.906  
2.894  
2.879  
2.867  
2.857  
2.858  
2.568  
2.549  
2.511  
2.494  
2.476  
2.459  
2.329  
2.310  
2.294  
2.175  
1.868  
1.854  
1.848  
1.832  
1.826  
1.811  
1.695  
1.687  
1.681  
1.675  
1.667  
1.661  
1.655  
1.647  
1.600  
1.590  
1.456  
1.450  
1.437  
1.422

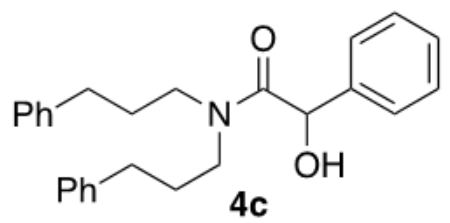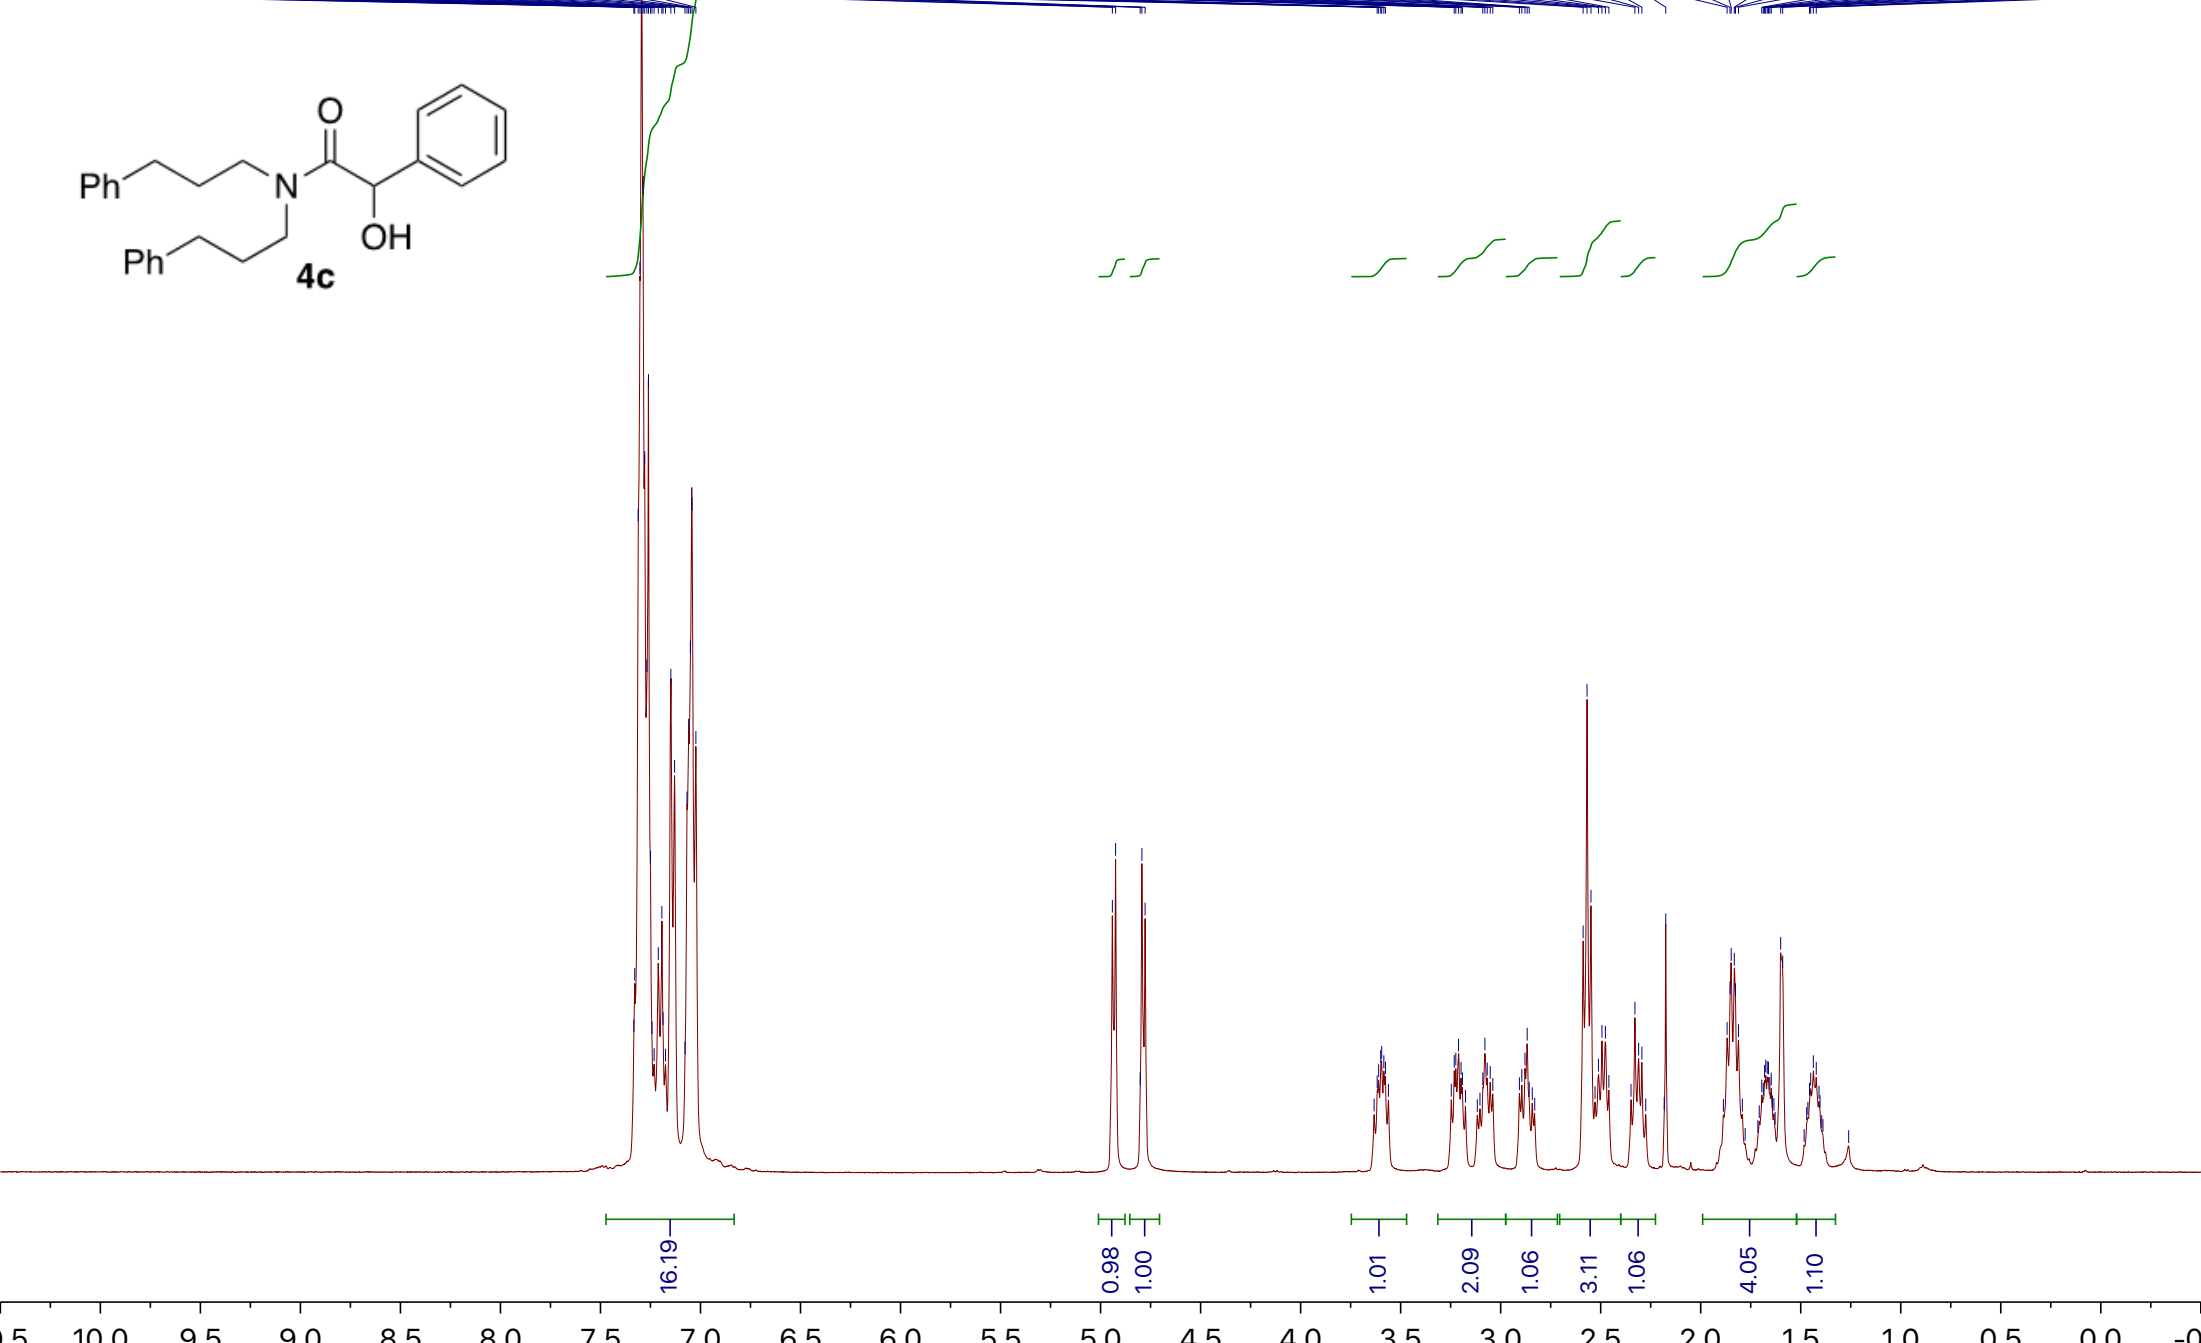

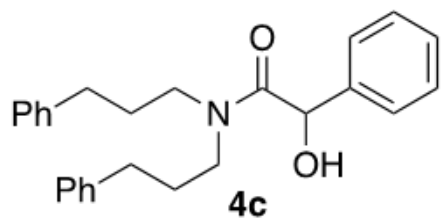

171.936

141.218

140.382

139.538

128.969

128.601

128.405

128.385

128.329

128.250

128.212

127.381

126.284

125.966

77.319

77.000

76.683

71.585

46.051

46.034

33.125

32.713

29.359

28.870

f1 (ppm) S46

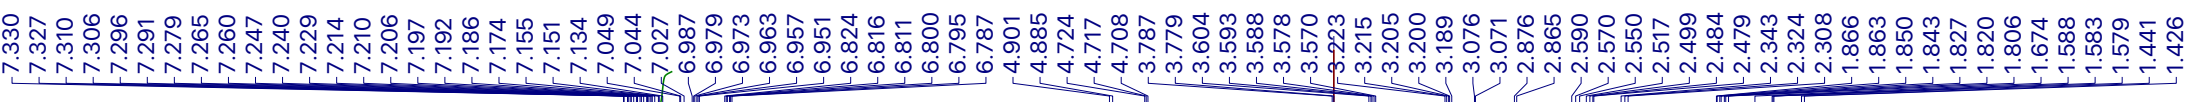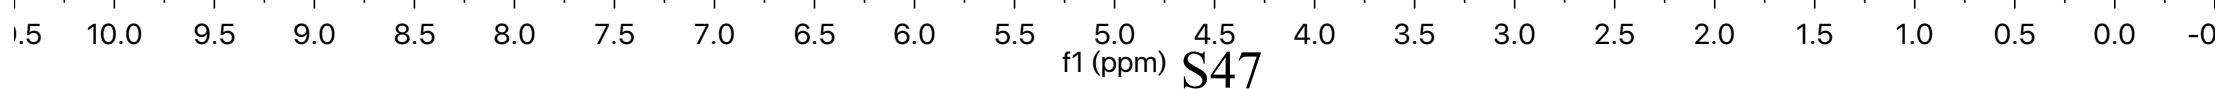

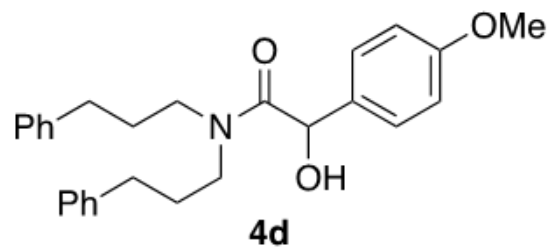

—172.175

—159.539

—141.250

—140.448

—131.861

—128.658

—128.593

—128.382

—128.260

—128.222

—126.265

—125.961

—114.292

77.319

77.001

76.683

70.997

—55.214

46.095

46.056

33.142

32.766

29.446

28.910

f1 (ppm)

S48



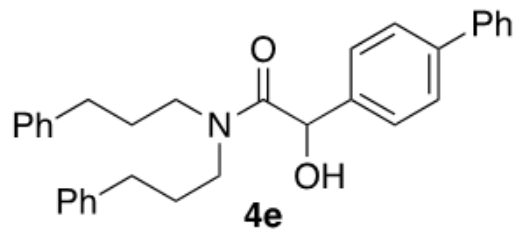

4e

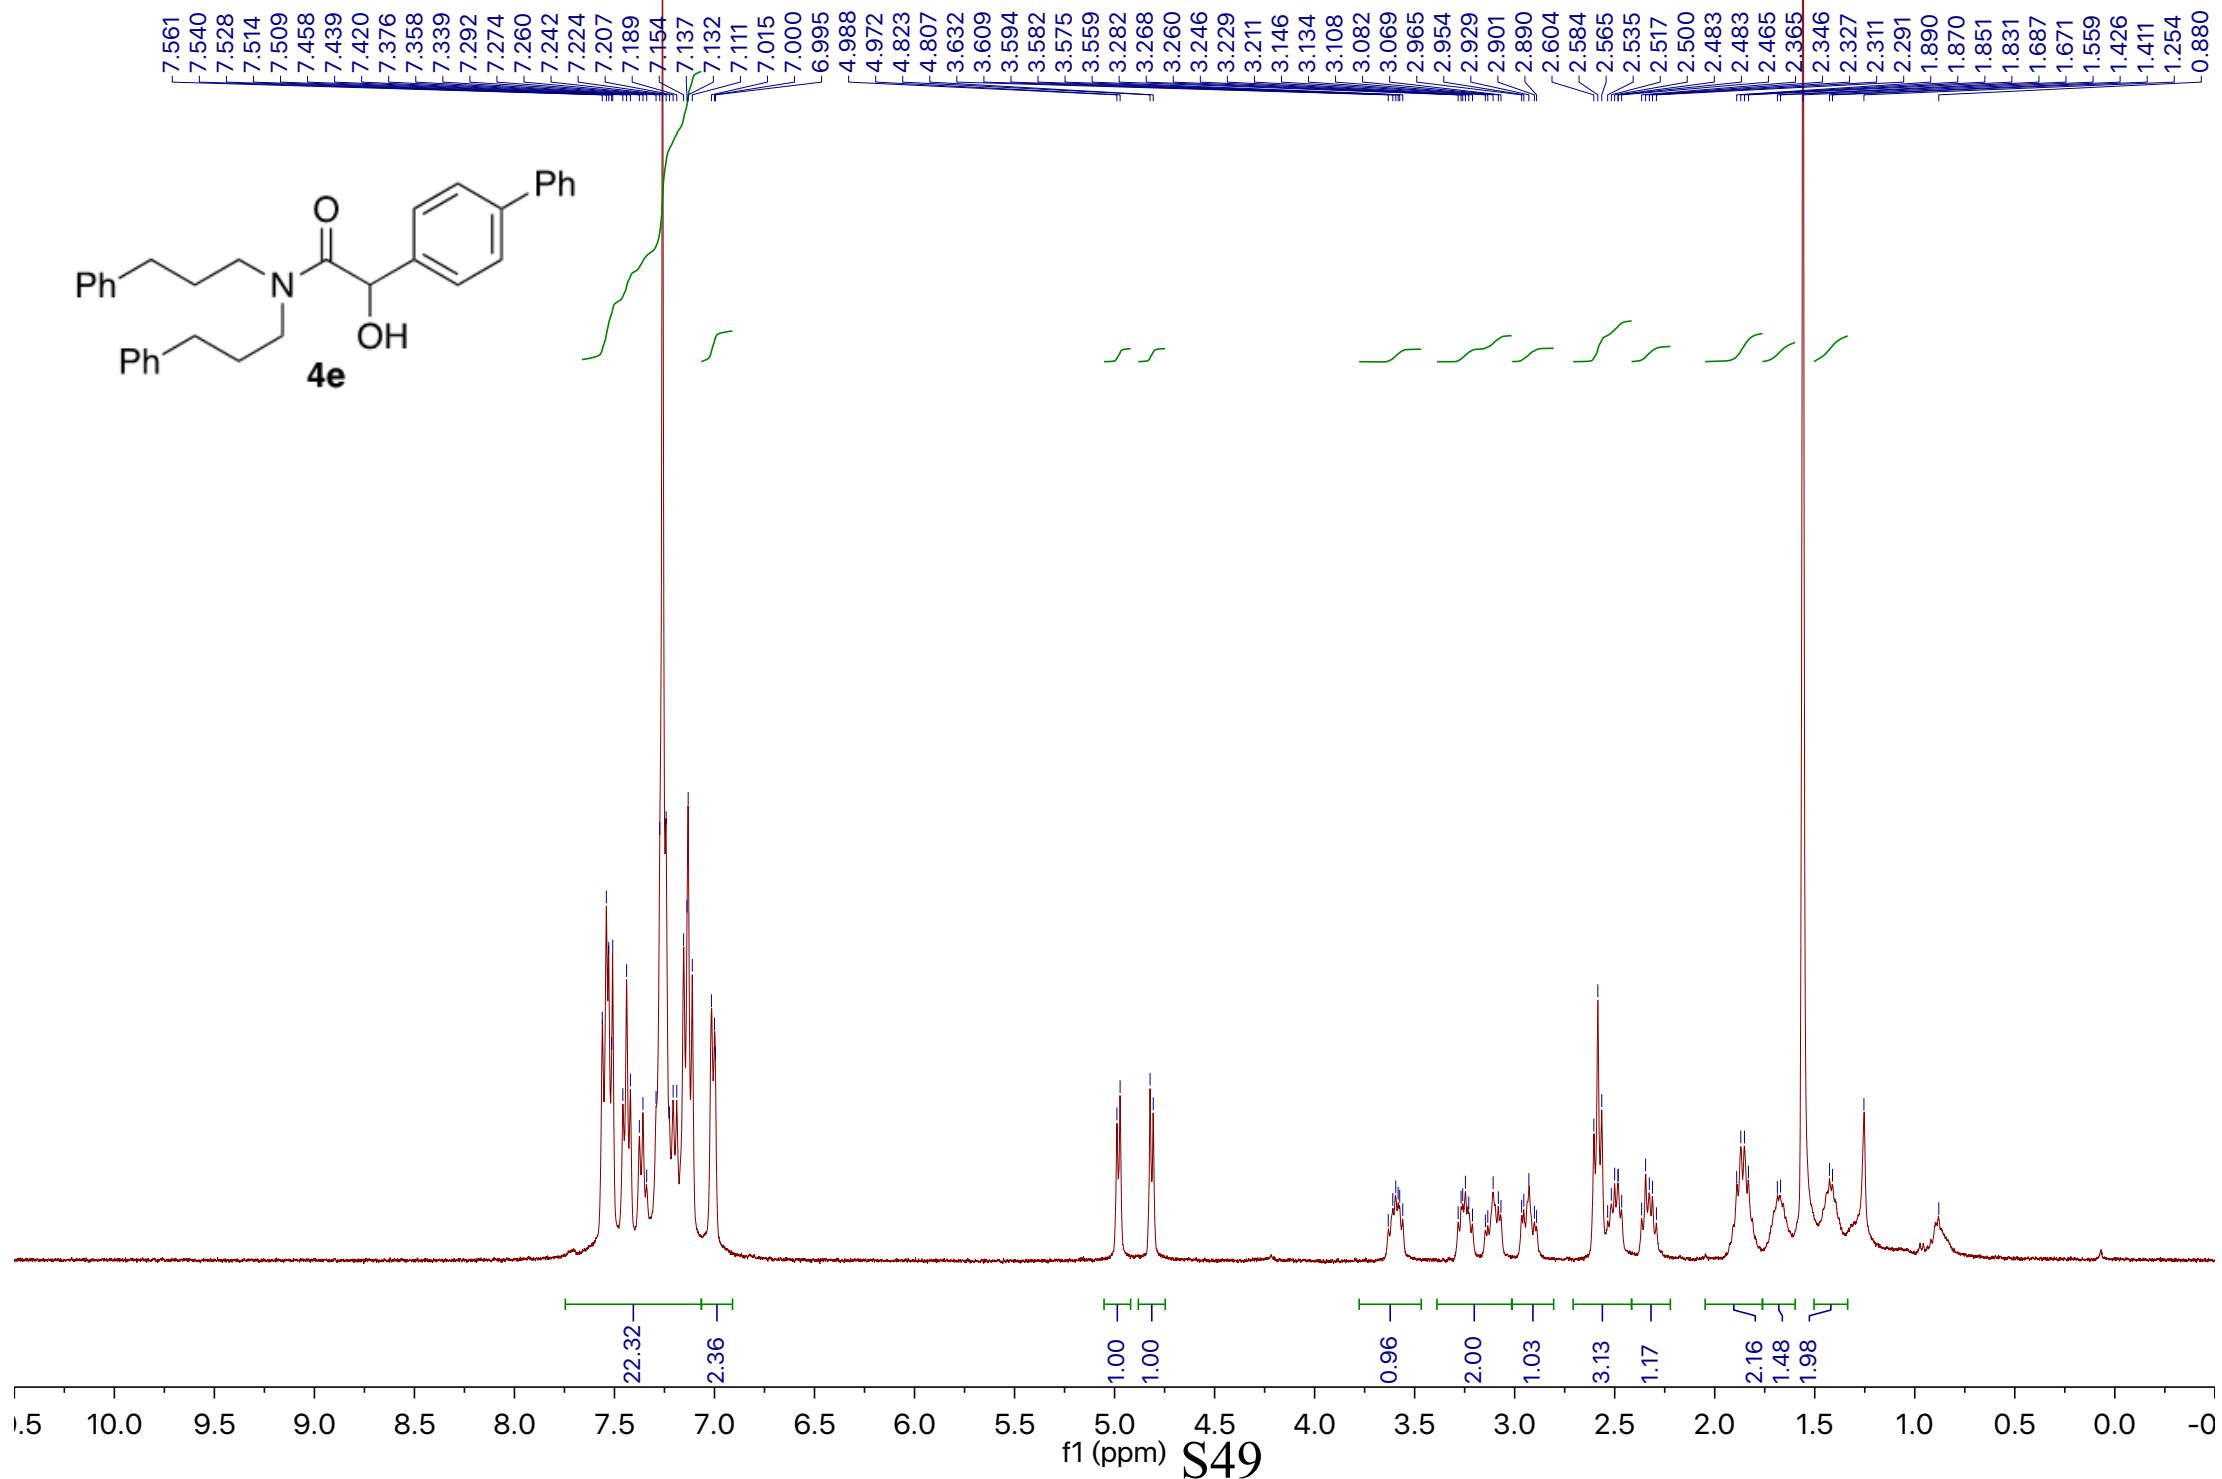

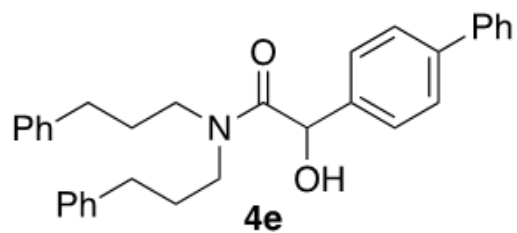

171.879

141.341

141.213

140.379

138.515

128.748

128.712

128.613

128.397

128.244

128.225

127.840

127.715

127.479

127.063

126.270

125.979

77.317

76.999

76.682

71.294

46.175

46.136

33.151

32.792

29.512

28.909

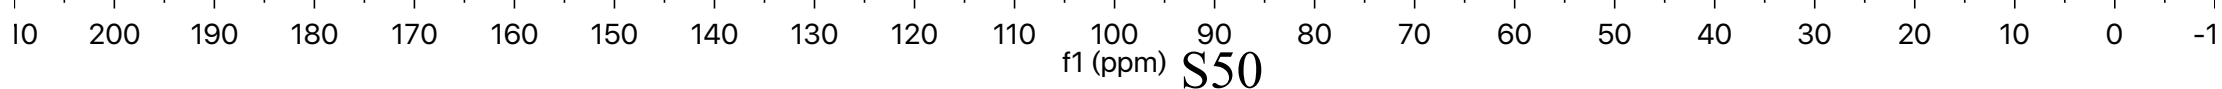

K\_ishidakento-1590-5-1-2-second.20.fid

KI\_1590-5-1-2

7.308 7.290 7.270 7.260 7.252 7.247 7.233 7.220 7.215 7.211 7.206 7.201 7.193 7.183 7.178 7.163 7.145 7.141 7.128 7.123 7.123 7.040 7.037 7.037 7.021 7.018 6.963 6.958 6.942 5.227 5.212 4.644 4.629 4.623 3.580 3.571 3.565 3.556 3.546 3.532 3.304 3.294 3.285 3.279 3.270 3.260 2.925 2.911 2.900 2.885 2.877 2.864 2.851 2.839 2.839 2.639 2.620 2.600 2.316 2.300 2.282 2.282 1.945 1.937 1.933 1.916 1.899 1.894 1.879 1.857 1.665 1.654 1.647 1.639 1.631 1.621 1.565 1.300 1.294 1.287 1.280 1.274 1.268 1.261 1.255

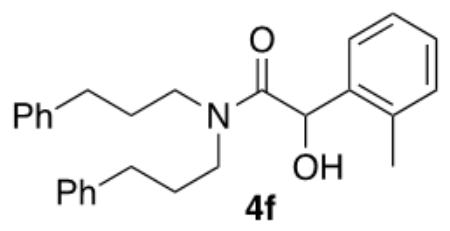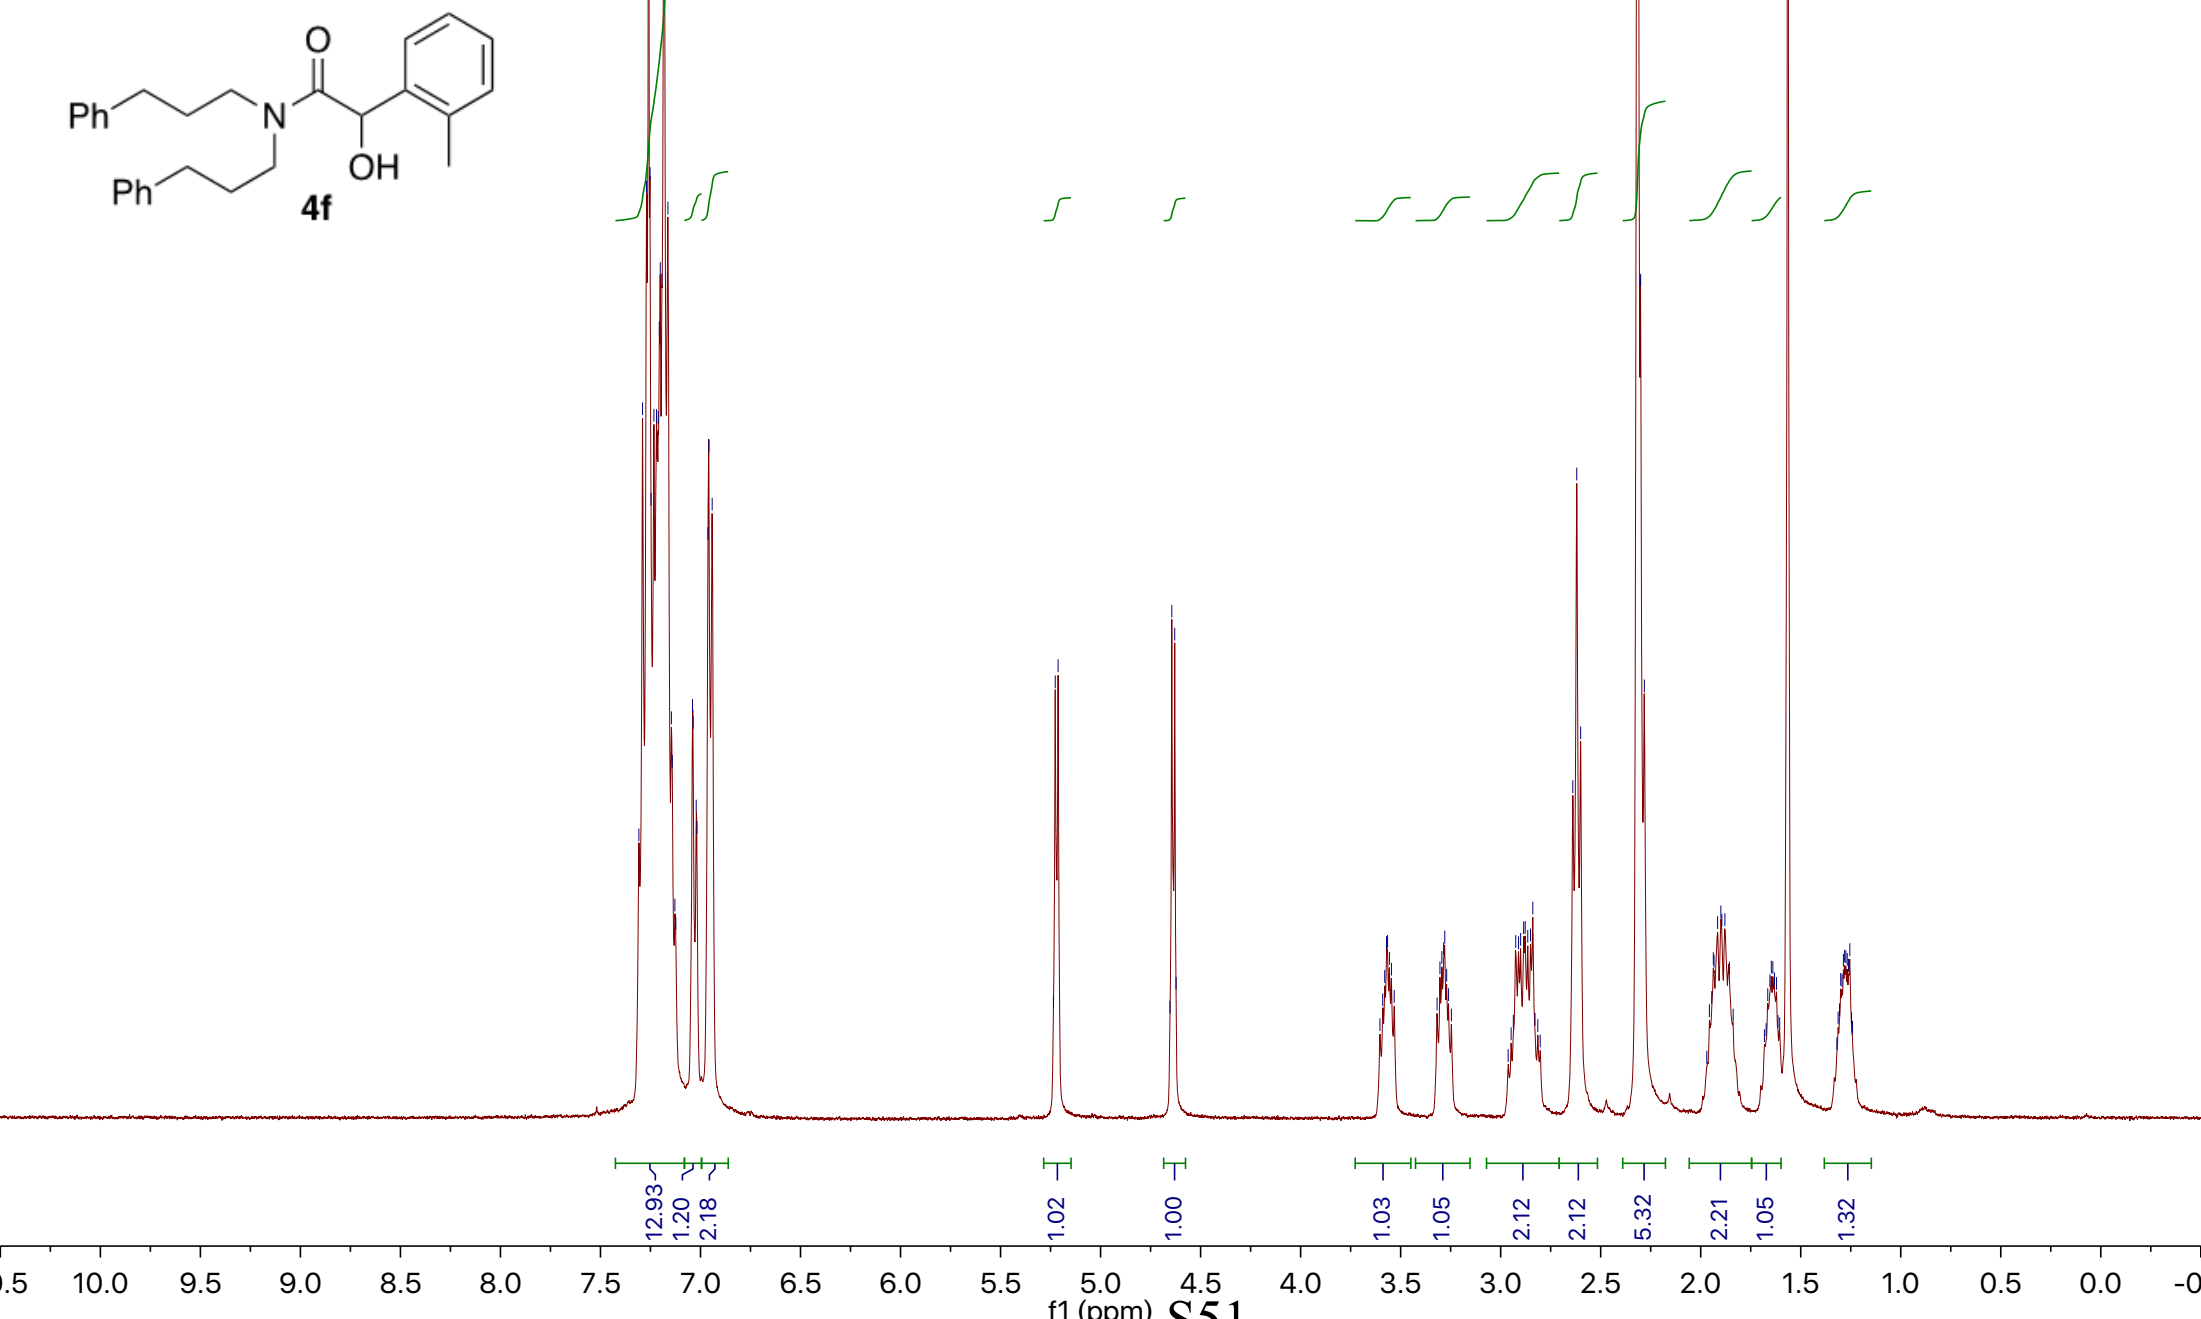

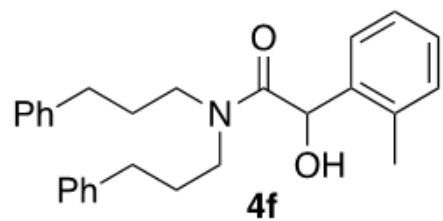

172.523

141.209

140.351

137.515

136.409

131.127

128.563

128.524

128.434

128.254

128.118

127.221

126.667

126.235

126.018

77.317

77.000

76.682

68.919

46.308

46.019

33.264

32.860

29.217

28.791

18.933

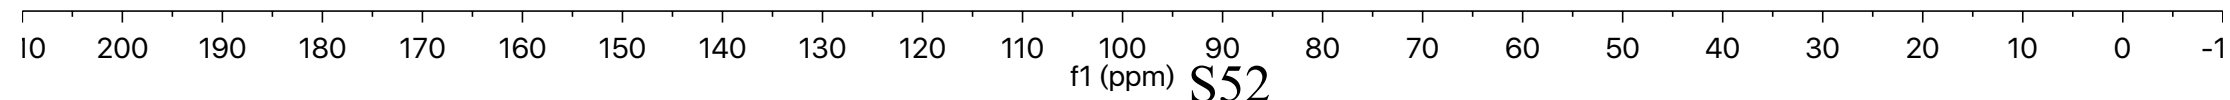

7.436  
7.431  
7.416  
7.411  
7.360  
7.342  
7.323  
7.301  
7.293  
7.282  
7.274  
7.265  
7.260  
7.225  
7.219  
7.213  
7.195  
7.178  
7.166  
7.155  
7.147  
7.135  
7.128  
7.076  
7.058  
6.932  
6.913  
4.826  
3.619  
3.602  
3.585  
3.566  
3.252  
3.234  
3.216  
3.200  
3.181  
3.067  
3.052  
3.042  
3.031  
3.015  
3.002  
2.886  
2.874  
2.859  
2.847  
2.837  
2.822  
2.809  
2.592  
2.572  
2.552  
2.546  
2.530  
2.378  
2.359  
2.341  
2.324  
2.305  
2.049  
1.882  
1.863  
1.844  
1.824  
1.805  
1.727  
1.714  
1.701  
1.695  
1.686  
1.681  
1.674  
1.666  
1.653  
1.570  
1.555  
1.539  
1.525  
1.510  
1.262

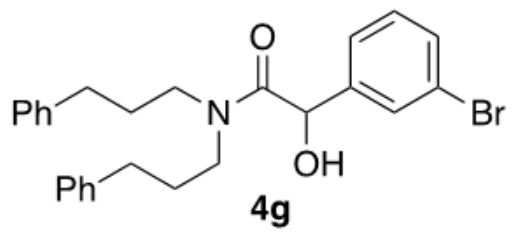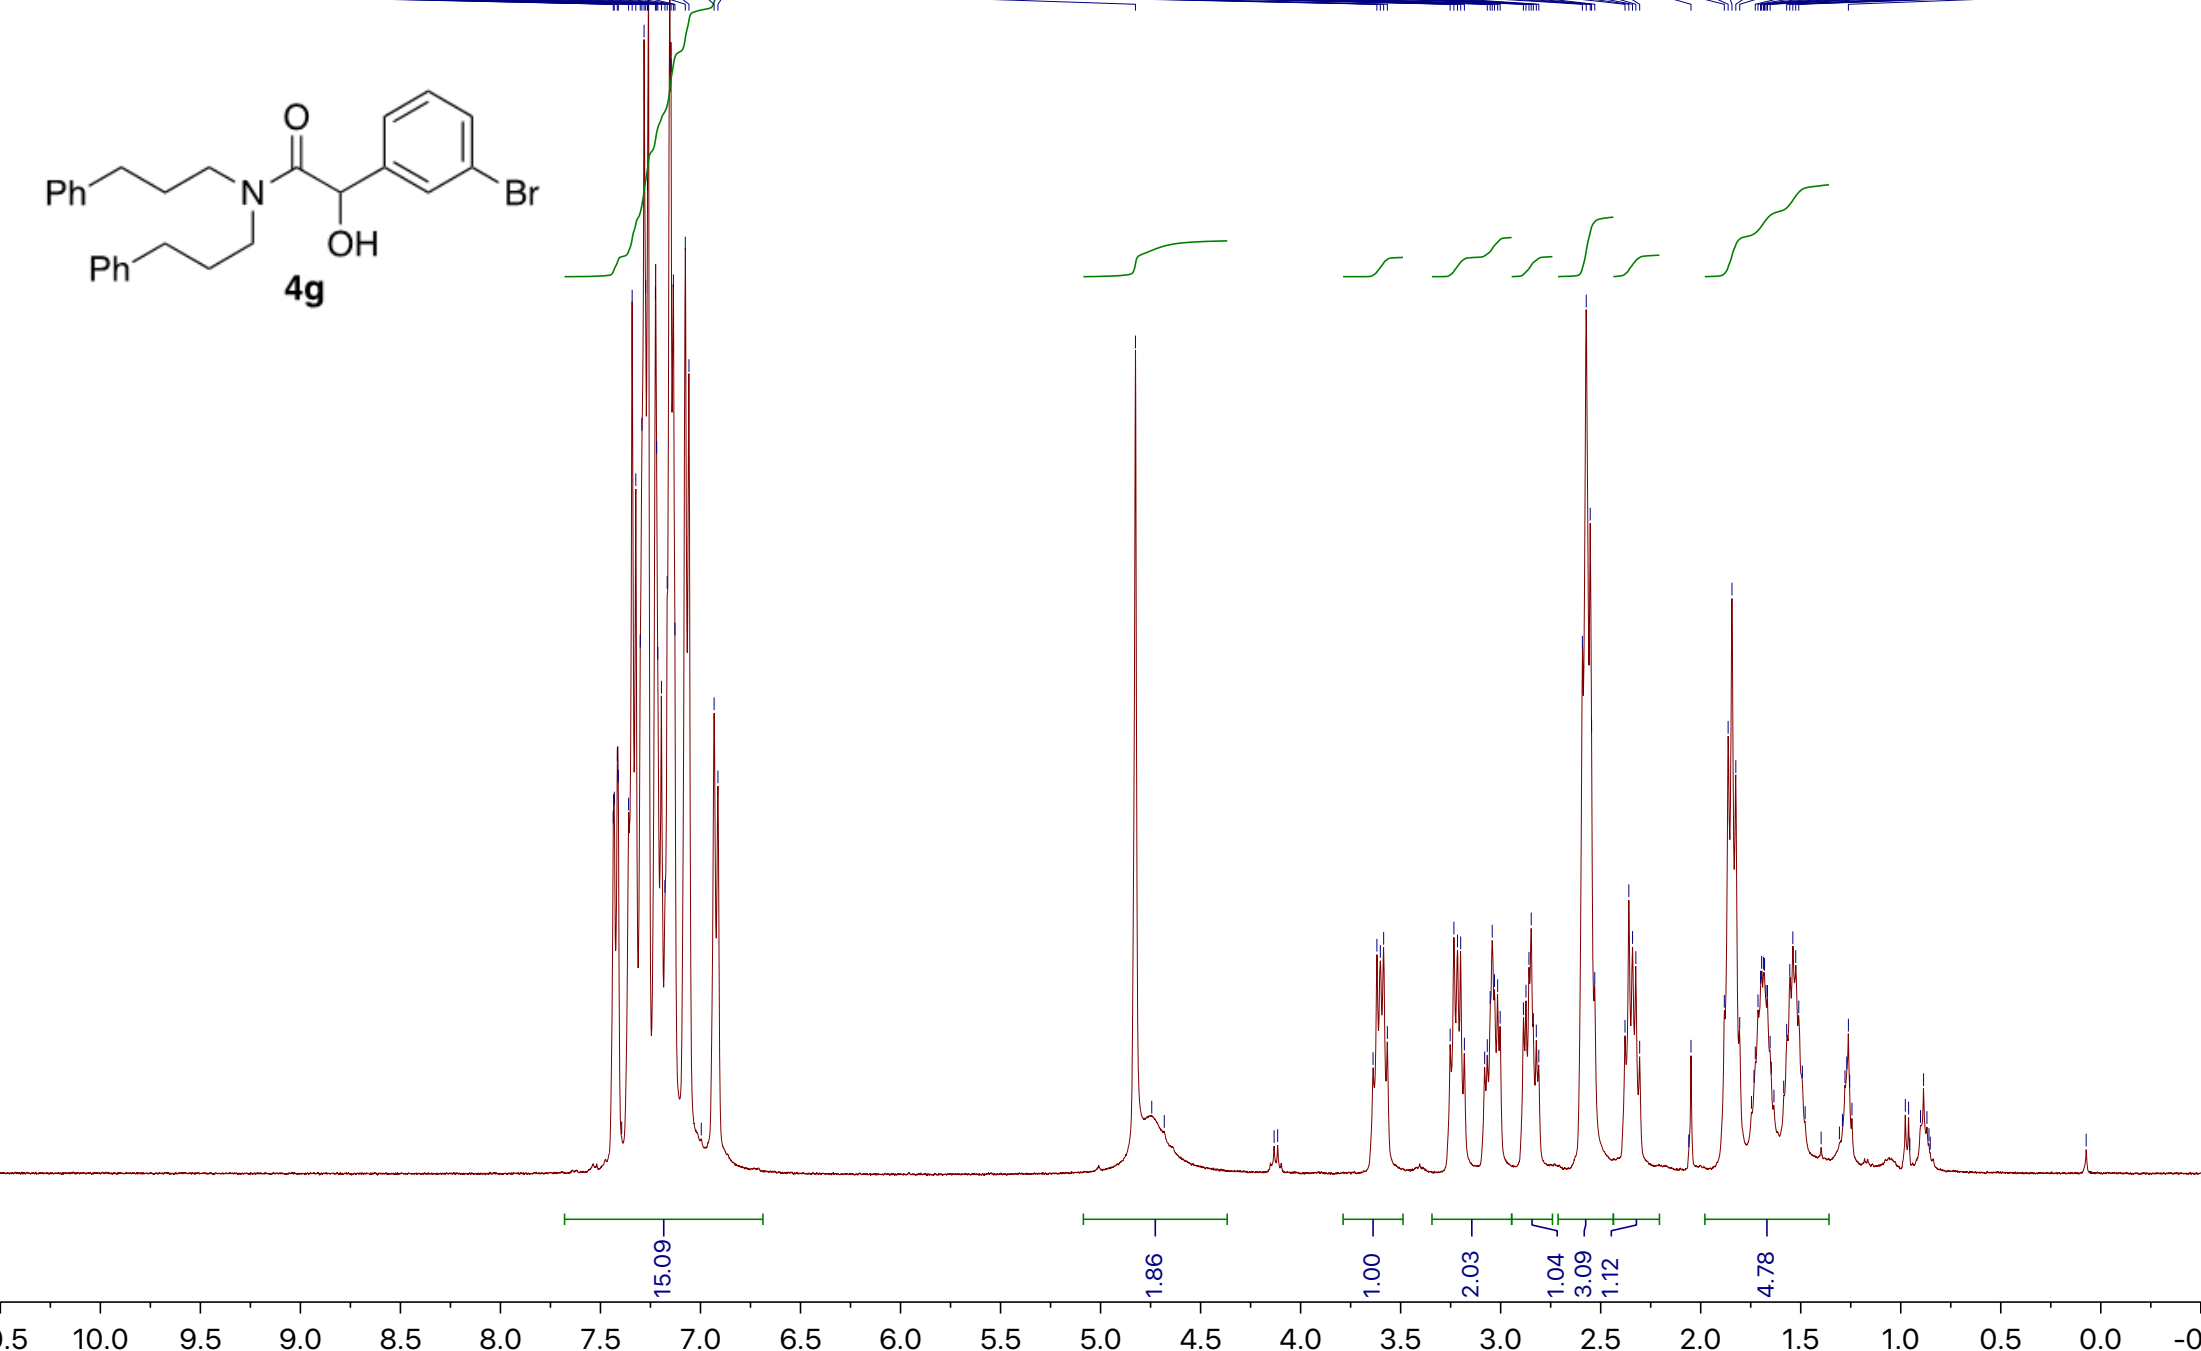

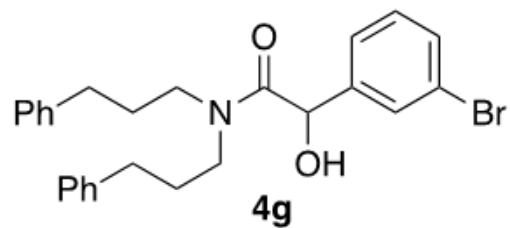

171.283

141.712

141.081

140.192

131.574

130.537

130.449

128.741

128.401

128.227

128.210

126.474

126.002

125.904

122.878

77.318

77.000

76.682

70.815

46.060

45.950

33.101

32.621

29.458

28.804

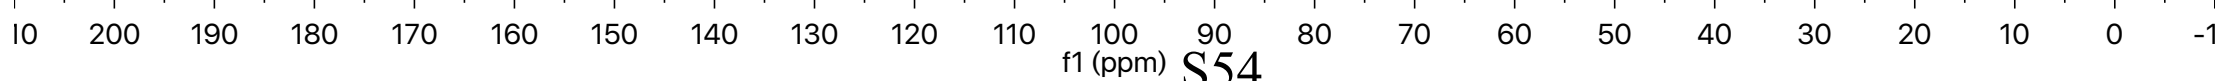

7.831 7.823 7.816 7.807 7.798 7.778 7.769 7.522 7.513 7.505 7.498 7.489 7.480 7.476 7.281 7.260 7.246 7.240 7.231 7.227 7.210 7.205 7.199 7.182 7.164 7.129 7.110 6.843 6.834 6.826 6.820 5.109 5.093 4.892 4.876 3.625 3.617 3.605 3.592 3.583 3.254 3.246 3.232 3.220 3.212 3.143 3.135 3.130 3.121 3.106 2.917 2.900 2.890 2.591 2.571 2.552 2.445 2.439 2.425 2.410 2.404 2.390 2.274 2.255 2.239 1.871 1.853 1.834 1.814 1.673 1.659 1.653 1.645 1.639 1.628 1.625 1.574 1.355 1.340 1.332 1.325

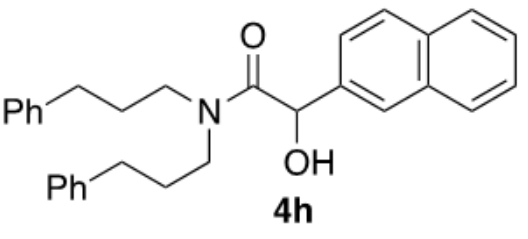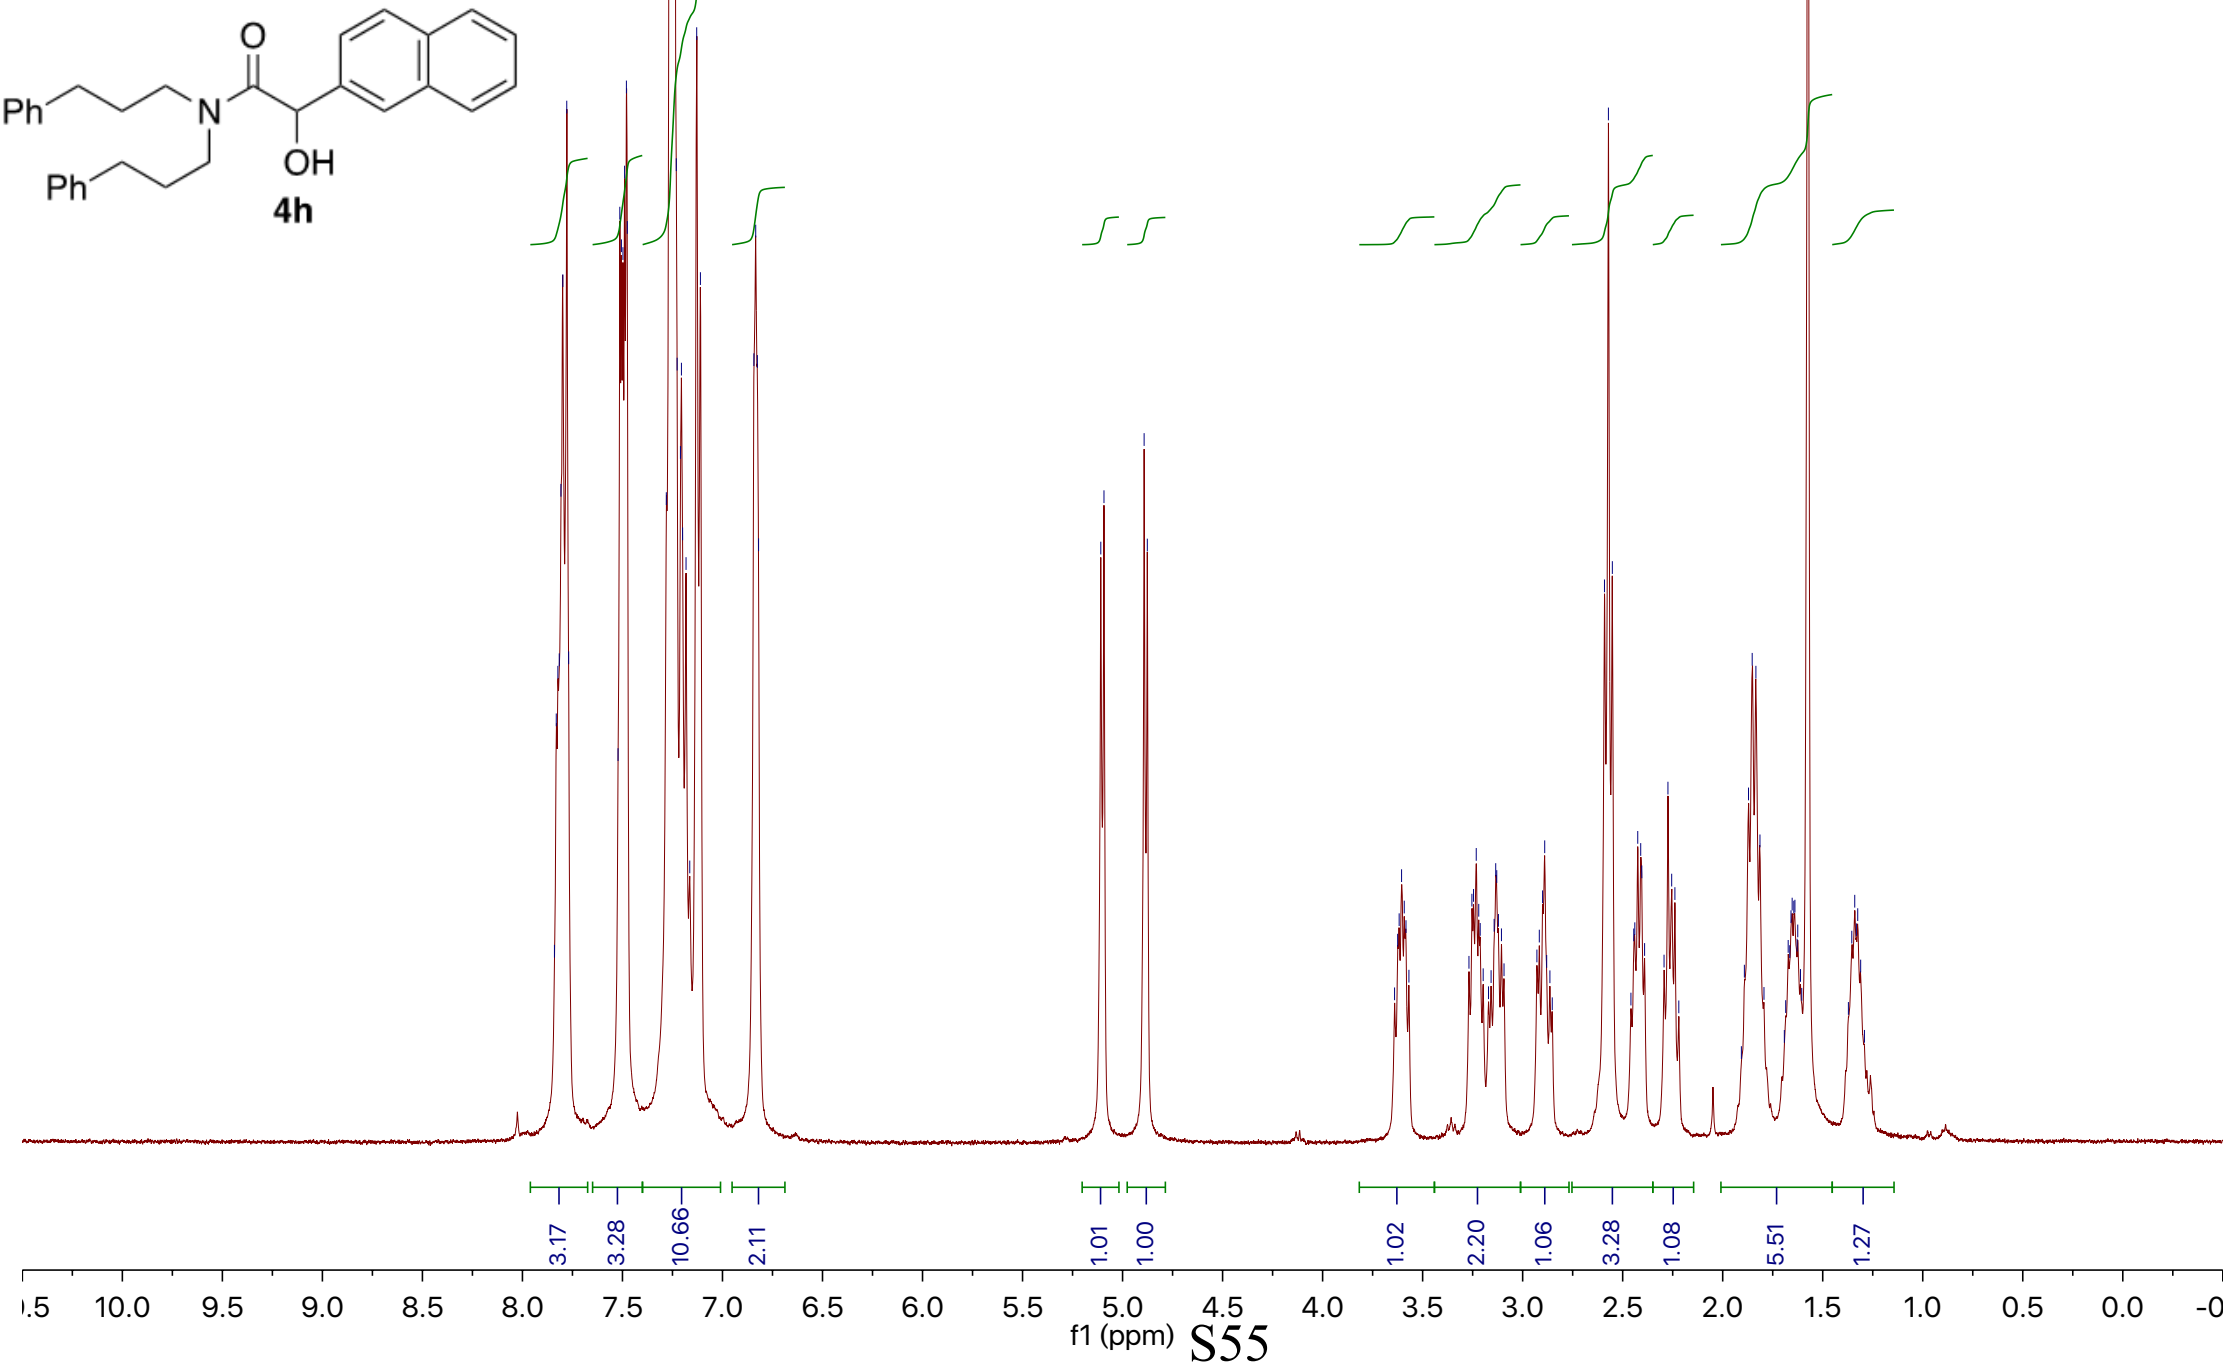

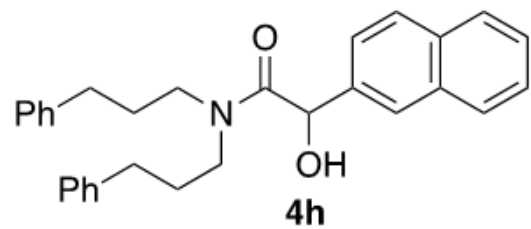

171.877

141.183  
140.330  
136.861  
133.246  
133.178  
129.112  
128.600  
128.384  
128.217  
128.155  
128.000  
127.710  
126.934  
126.384  
126.255  
125.967  
124.52177.317  
77.000  
76.682  
71.74946.167  
46.13733.140  
32.716  
29.609  
28.880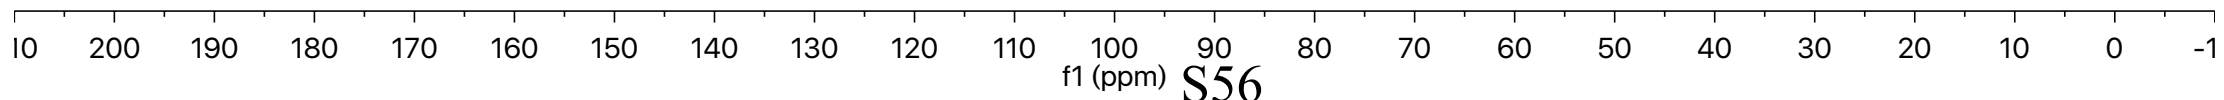



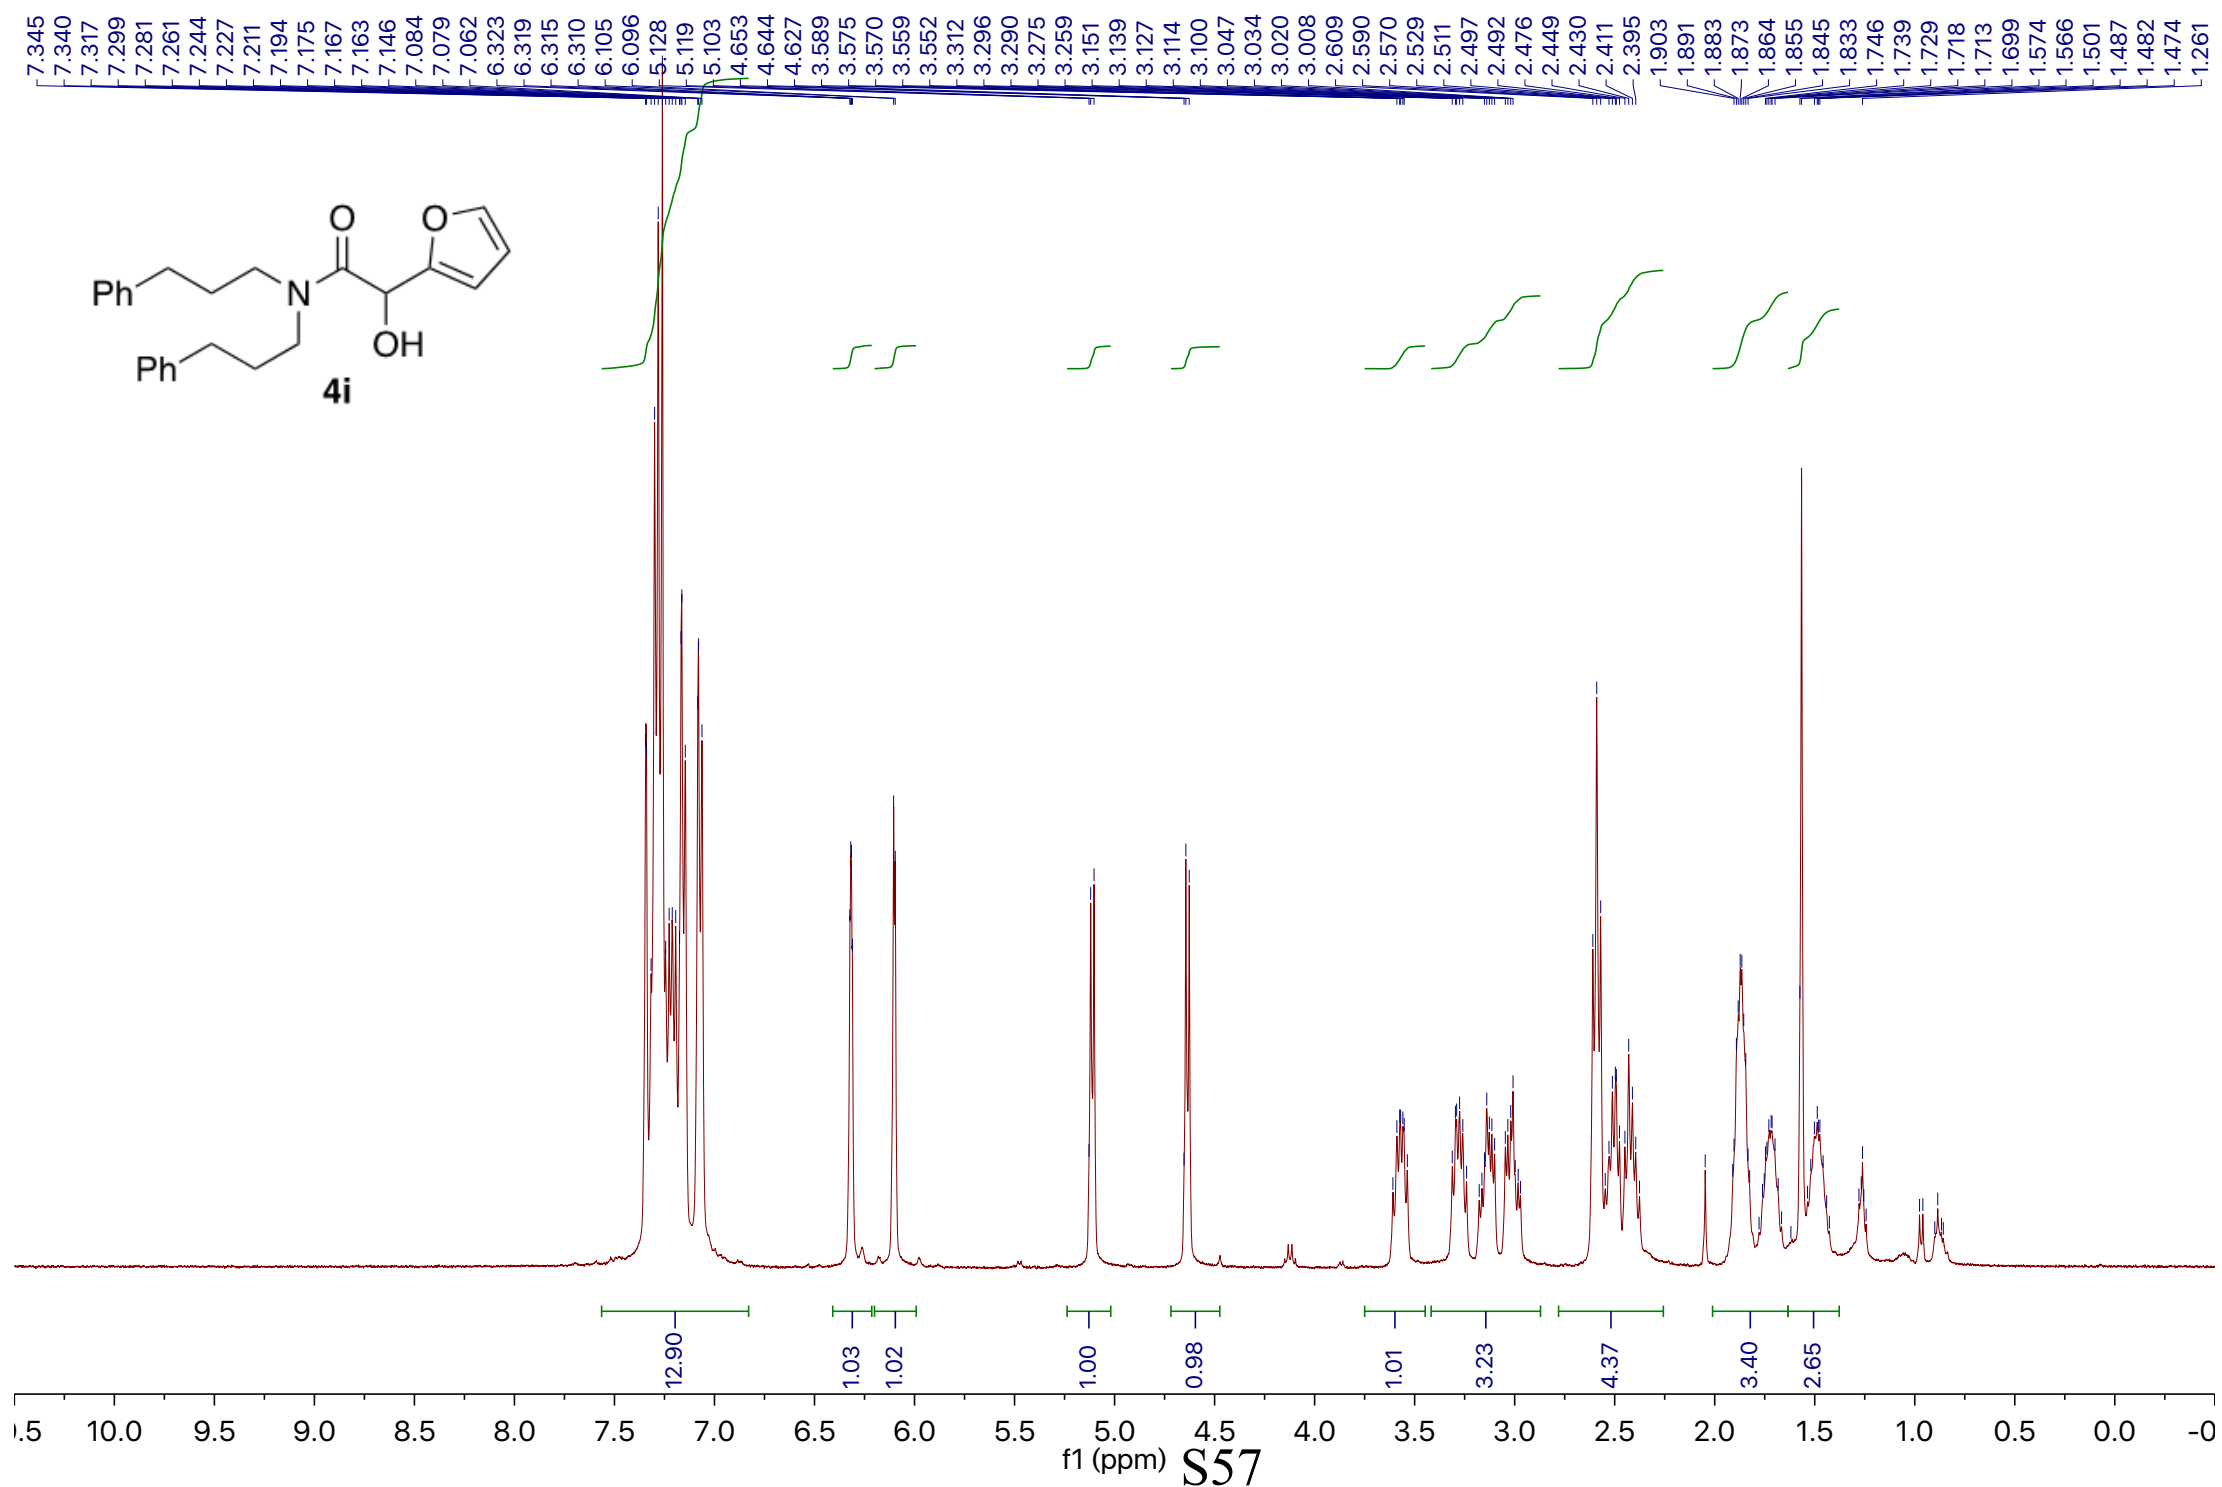

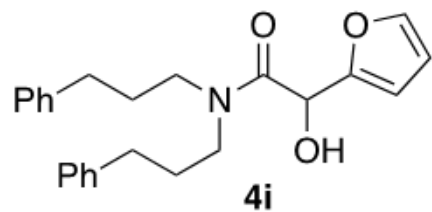

169.651

152.192

142.599

141.228

140.361

128.568

128.403

128.237

128.188

126.294

125.986

110.643

108.219

77.318

77.000

76.683

64.514

46.148

46.129

33.081

32.754

29.516

28.831

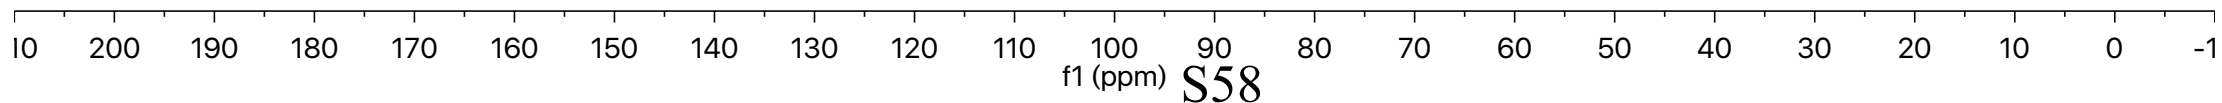

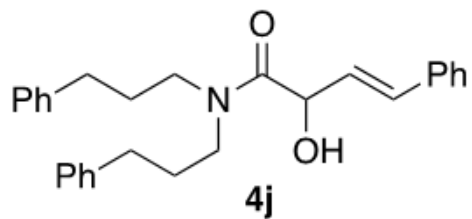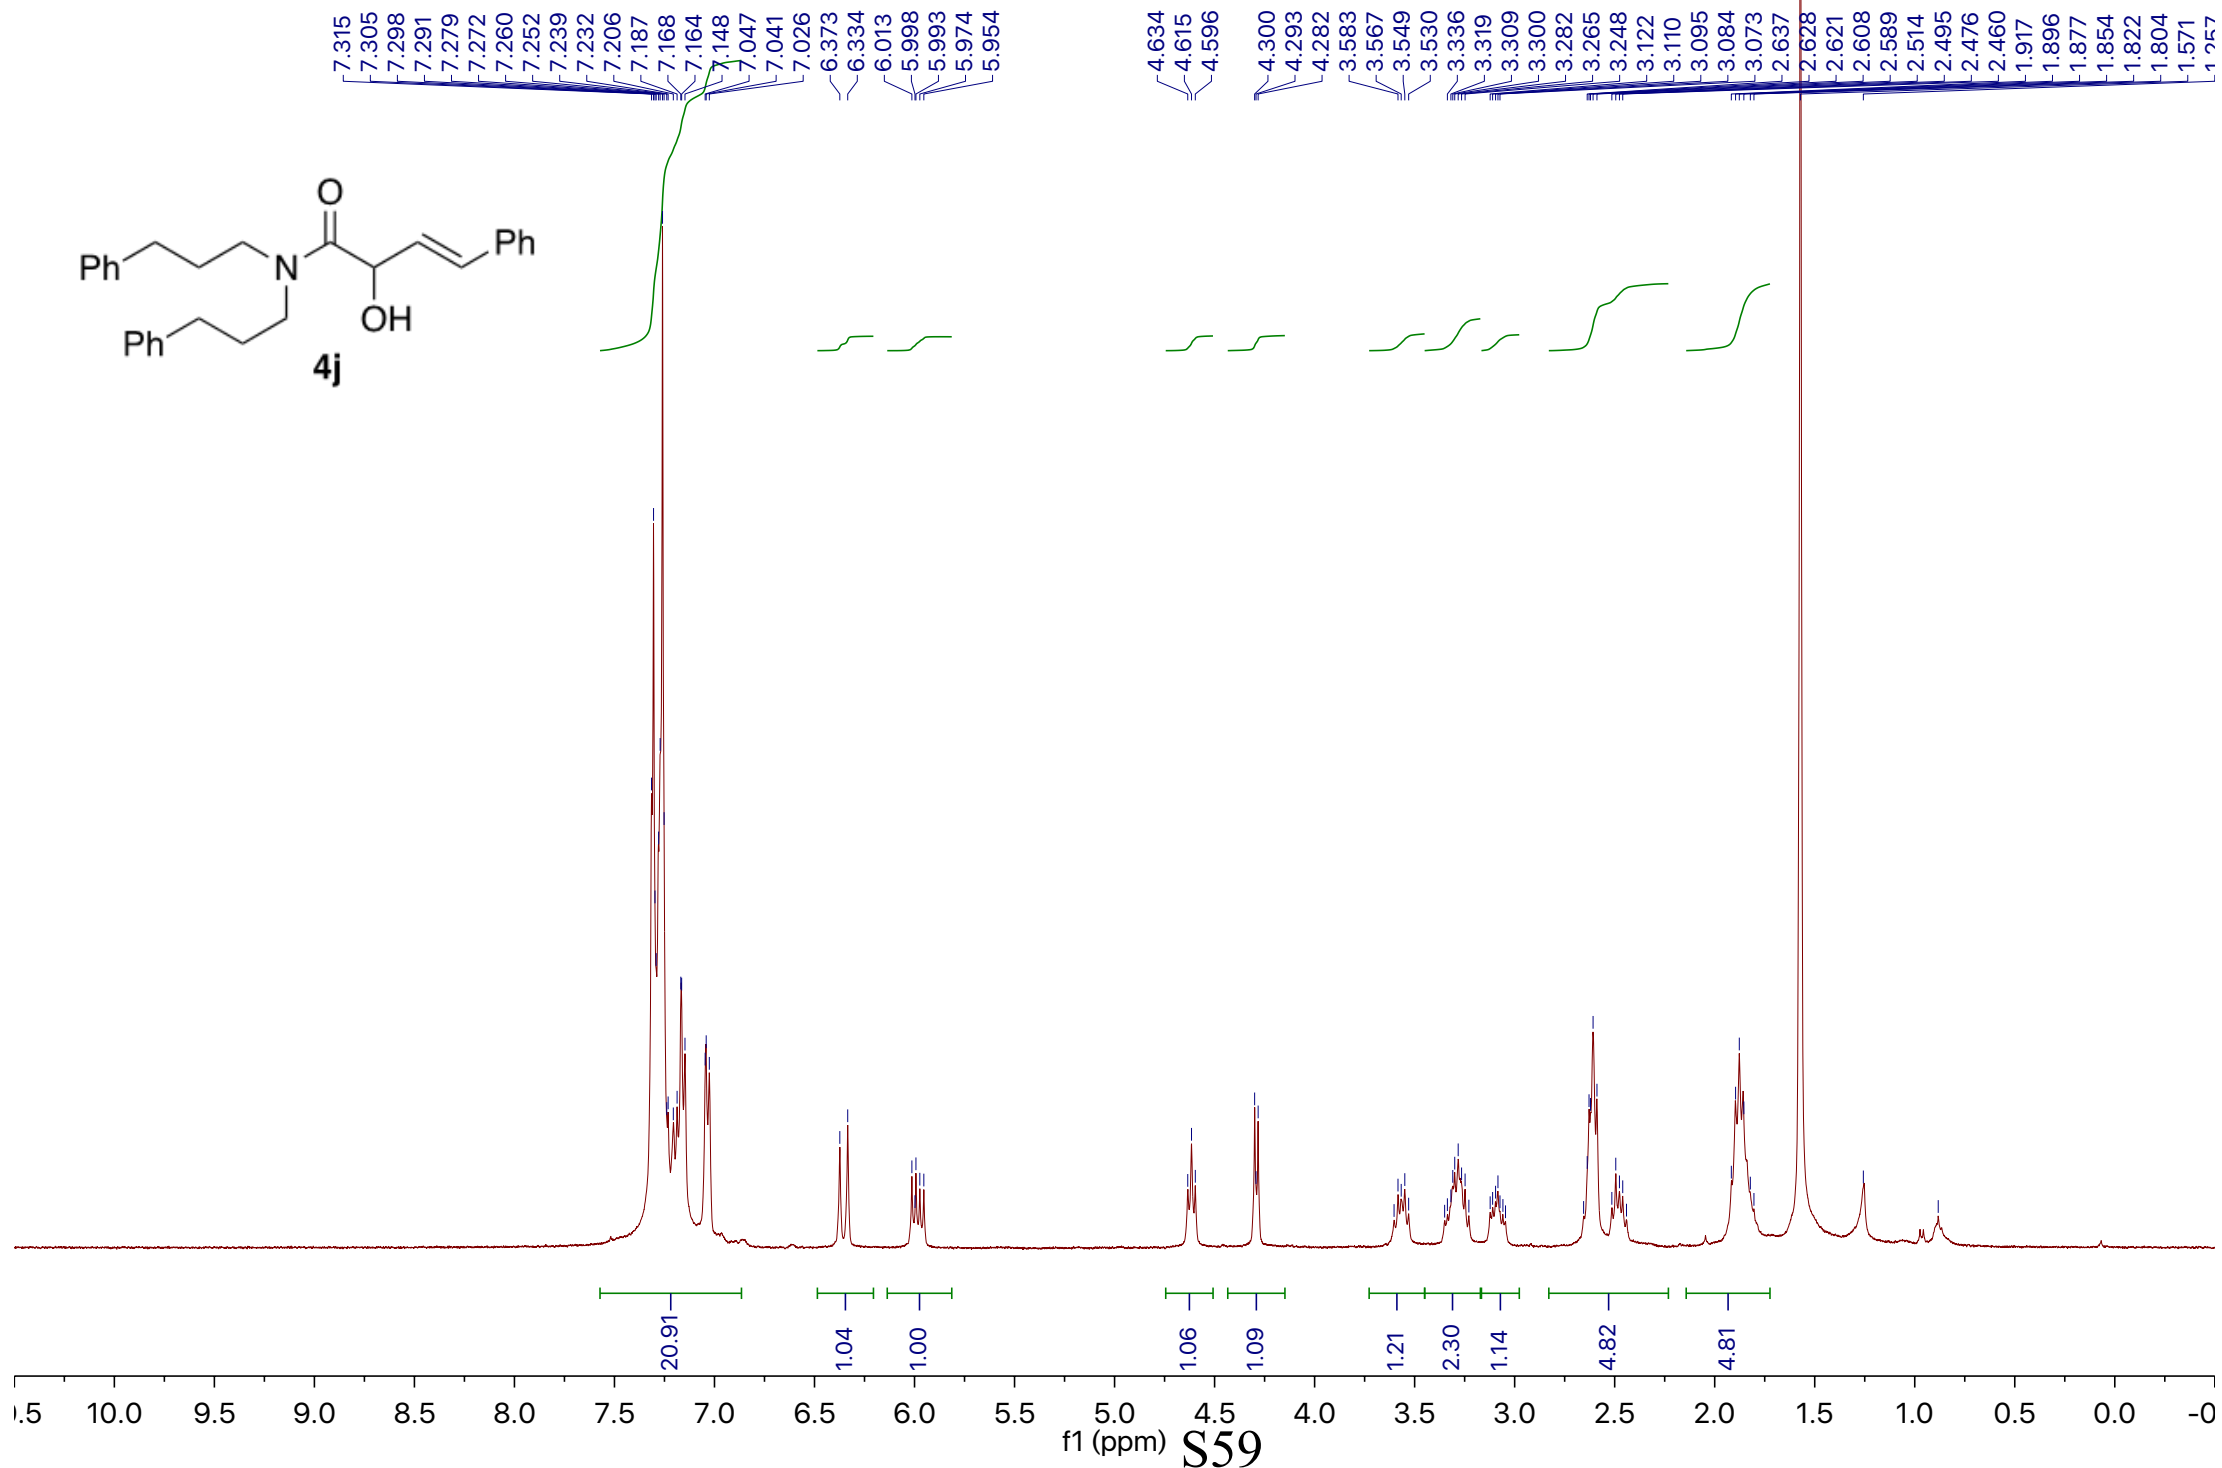

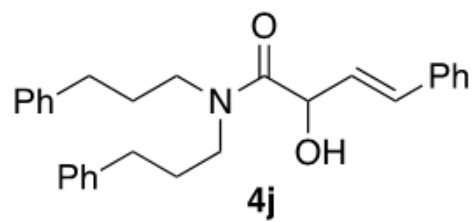

171.849

141.189

140.351

135.936

133.932

128.671

128.598

128.423

128.253

128.205

126.653

126.415

126.374

126.013

77.317

76.999

76.682

69.763

46.187

46.127

33.165

32.822

30.093

29.044

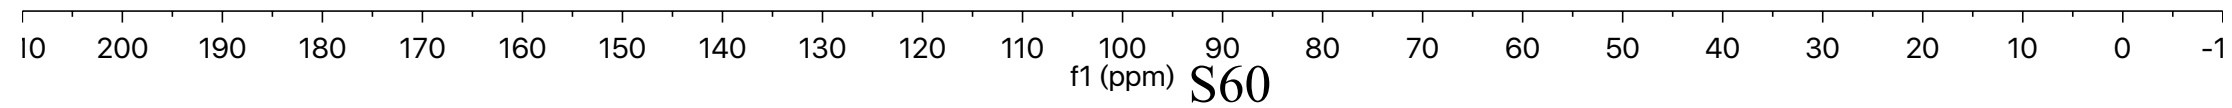

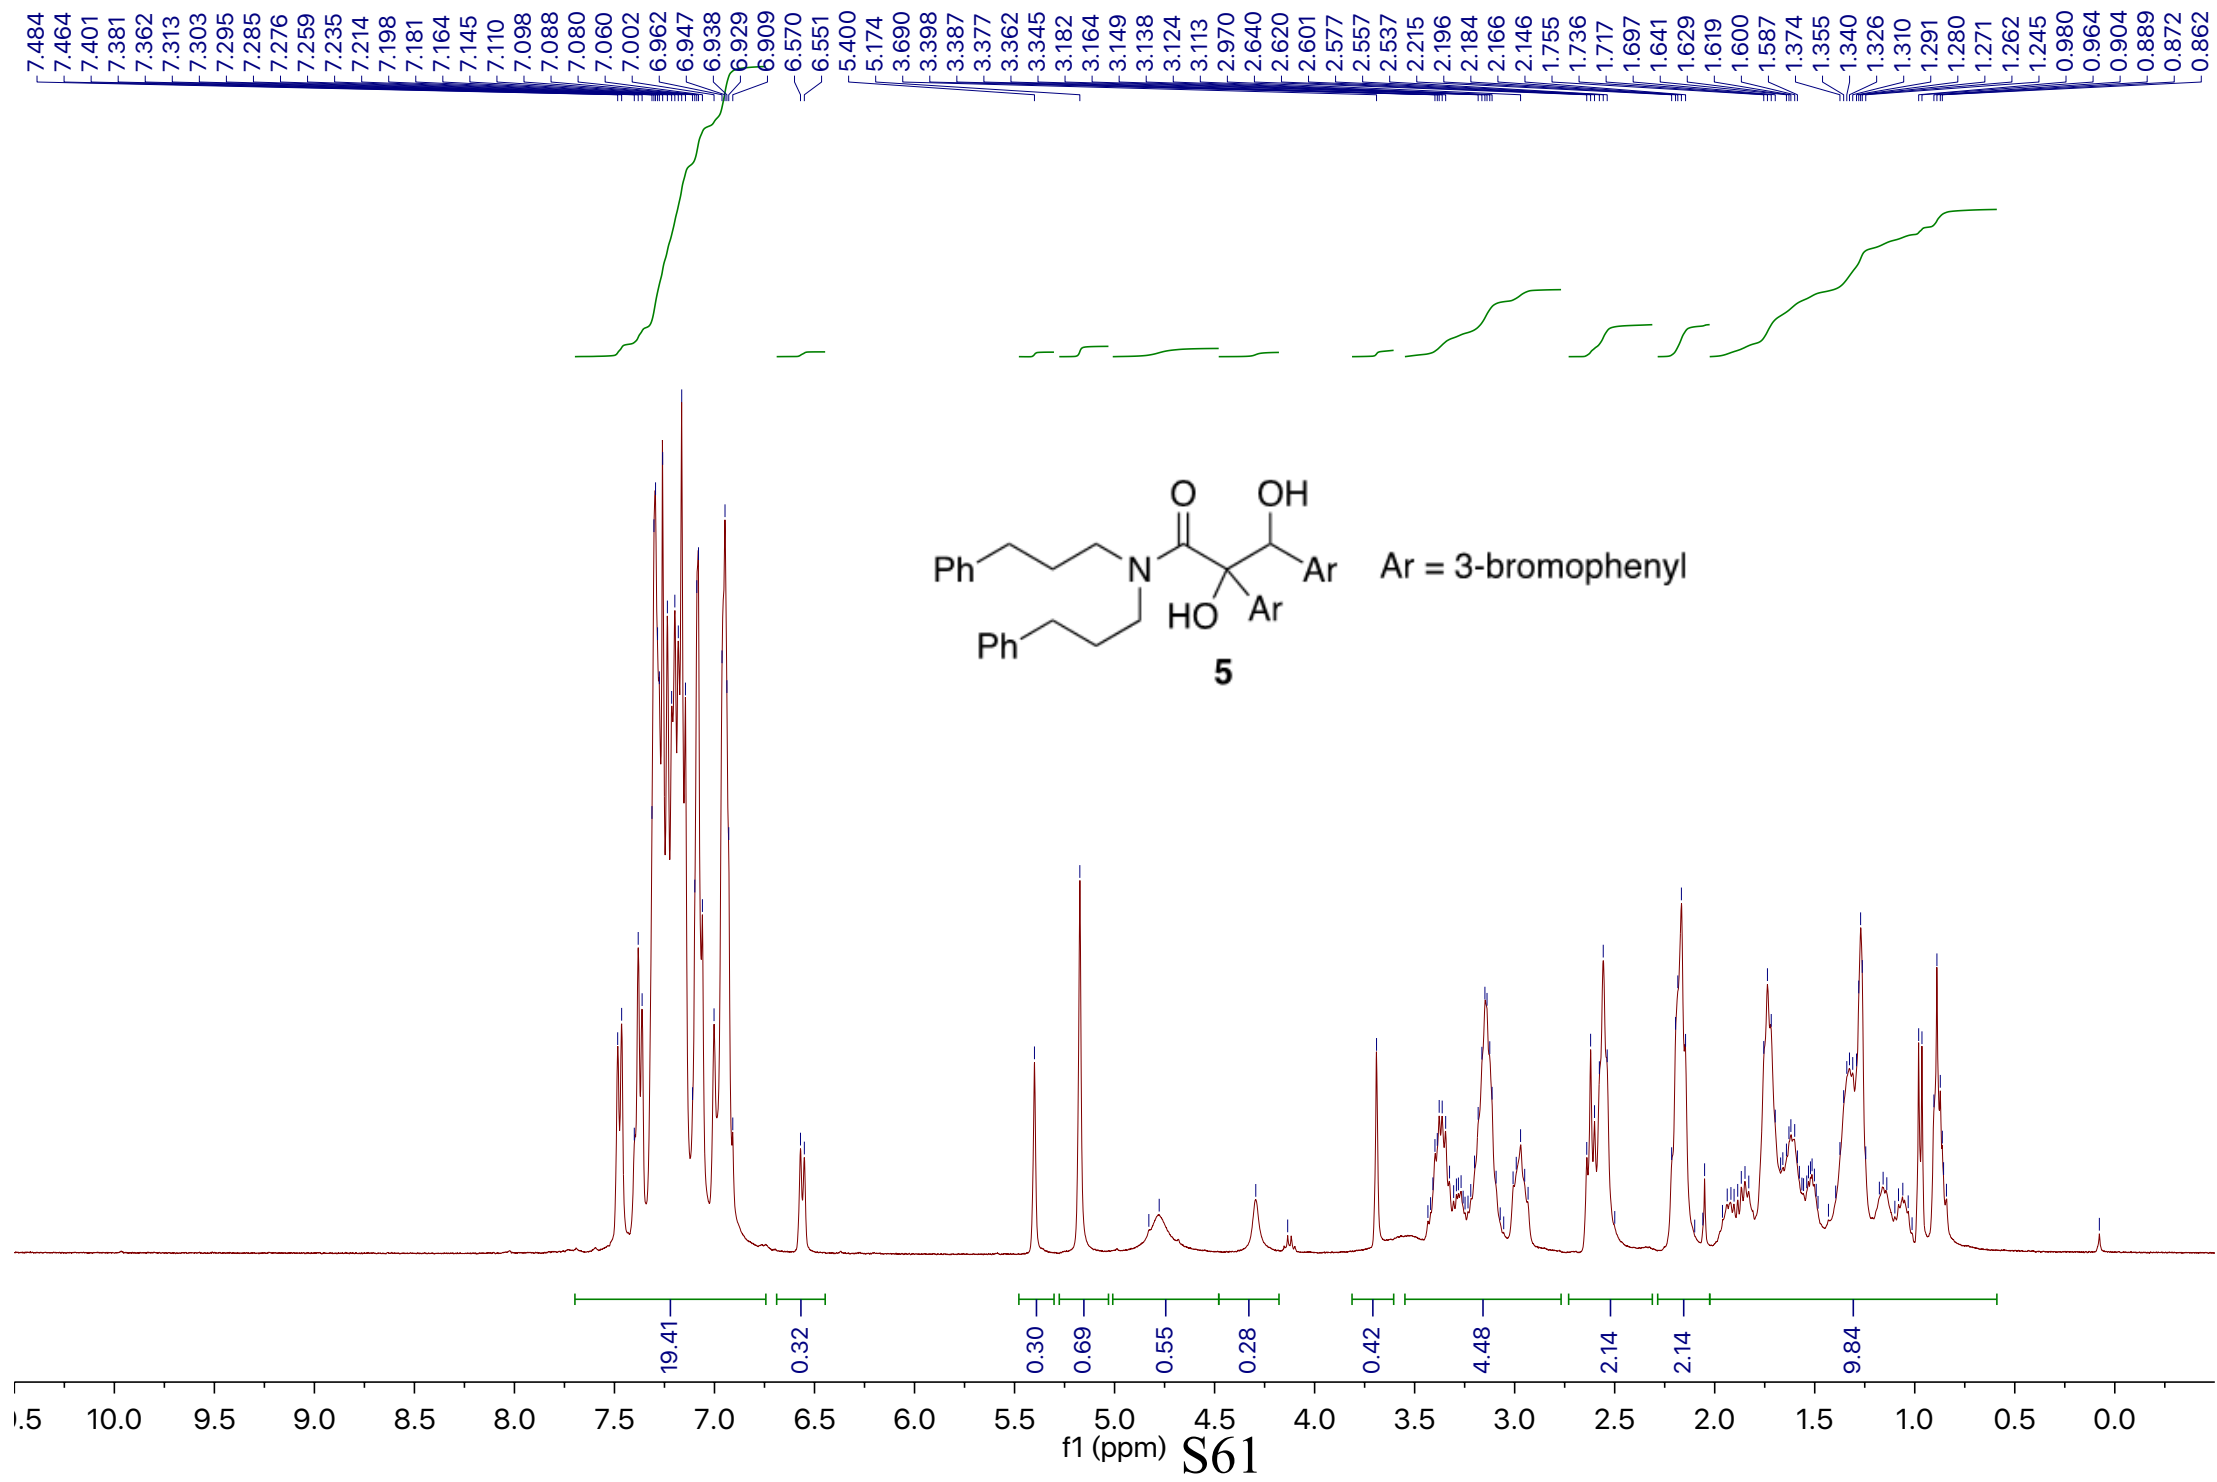

172.739  
171.829141.245  
141.201  
140.892  
140.705  
140.651  
140.313  
139.803  
138.564  
131.357  
131.213  
131.166  
131.073  
130.727  
130.629  
129.842  
129.468  
129.237  
128.540  
128.443  
128.401  
128.338  
128.268  
128.155  
128.110  
127.946  
126.605  
126.357  
126.075  
126.025  
126.008  
125.962  
125.154  
123.365  
122.624  
122.208  
121.822  
121.468  
82.031  
79.804  
78.357  
77.317  
77.000  
76.682  
47.476  
46.420  
46.318  
34.646  
34.507  
33.335  
33.244  
32.962  
32.882  
31.575  
29.615  
29.373  
28.450  
28.059  
25.262  
22.645  
20.691  
14.123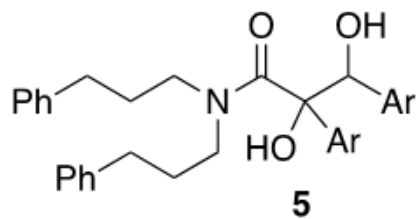

Ar = 3-bromophenyl

5

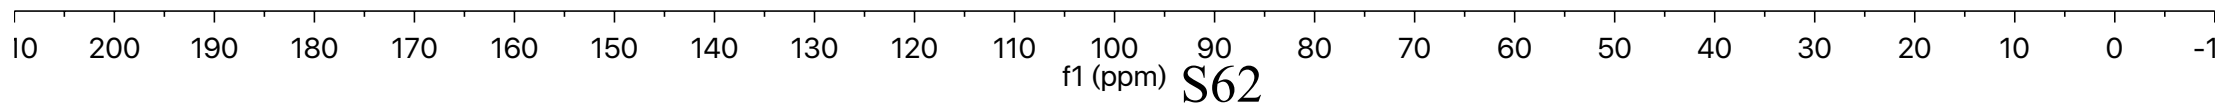

Supplement: d1cc06377d1.pdf [file d1cc06377d1.pdf]
